# Supplementary material for: Deepening of In Silico Evaluation of SARS-CoV-2 Detection RT-qPCR Assays in the Context of New Variants
Source: MDPI journal article supplement (doi:10.3390/genes12040565), 2021-04-13
Supplement: s1 [file s1]

We gratefully acknowledge the following Authors from the Originating laboratories responsible for obtaining the specimens, as well as the Submitting laboratories where the genome data were generated and shared via GISAID, on which this research is based.

All Submitters of data may be contacted directly via [www.gisaid.org](http://www.gisaid.org)

Authors are sorted alphabetically.

[illegible]

[illegible]

[illegible]

[illegible]

[illegible]

[illegible]

[illegible]

[illegible]



[illegible]

[illegible]

[illegible]

[illegible]

[illegible]

|                                                                                                                                                                                                                                                                                                                                                                                                                                                                                                                                                                                                                                                                                                                                                                                                                                                                                                                                                                                                                                                                                                                                                                                                                                                                                                                                                                                                                                                                                                                                                                                                                                                                                                                                                                                                                                                                                                                                                                                                                                                                                                                                                                                                                                                                                                                                                                                                                                                                                                                                                                                                                                                                                                                                                                                                                                                                                                                                                                                                                                                                                                                                                                                                                                                                                                                                                                                                                                                                                                                                                                                                                                                                                                                                                                                                                                                                                                                                                                                                                                                                                                                                                                                                                                                                                                                                                                                                                                                                                                                                                                                                                                                                                                                                                                                                                                                                                                                                                                                                                |                                 |                                                                            |                                                                                                                                                                                                                                                                                                   |                                                                                                                                                                                                                                                                   |
|----------------------------------------------------------------------------------------------------------------------------------------------------------------------------------------------------------------------------------------------------------------------------------------------------------------------------------------------------------------------------------------------------------------------------------------------------------------------------------------------------------------------------------------------------------------------------------------------------------------------------------------------------------------------------------------------------------------------------------------------------------------------------------------------------------------------------------------------------------------------------------------------------------------------------------------------------------------------------------------------------------------------------------------------------------------------------------------------------------------------------------------------------------------------------------------------------------------------------------------------------------------------------------------------------------------------------------------------------------------------------------------------------------------------------------------------------------------------------------------------------------------------------------------------------------------------------------------------------------------------------------------------------------------------------------------------------------------------------------------------------------------------------------------------------------------------------------------------------------------------------------------------------------------------------------------------------------------------------------------------------------------------------------------------------------------------------------------------------------------------------------------------------------------------------------------------------------------------------------------------------------------------------------------------------------------------------------------------------------------------------------------------------------------------------------------------------------------------------------------------------------------------------------------------------------------------------------------------------------------------------------------------------------------------------------------------------------------------------------------------------------------------------------------------------------------------------------------------------------------------------------------------------------------------------------------------------------------------------------------------------------------------------------------------------------------------------------------------------------------------------------------------------------------------------------------------------------------------------------------------------------------------------------------------------------------------------------------------------------------------------------------------------------------------------------------------------------------------------------------------------------------------------------------------------------------------------------------------------------------------------------------------------------------------------------------------------------------------------------------------------------------------------------------------------------------------------------------------------------------------------------------------------------------------------------------------------------------------------------------------------------------------------------------------------------------------------------------------------------------------------------------------------------------------------------------------------------------------------------------------------------------------------------------------------------------------------------------------------------------------------------------------------------------------------------------------------------------------------------------------------------------------------------------------------------------------------------------------------------------------------------------------------------------------------------------------------------------------------------------------------------------------------------------------------------------------------------------------------------------------------------------------------------------------------------------------------------------------------------------------------------------|---------------------------------|----------------------------------------------------------------------------|---------------------------------------------------------------------------------------------------------------------------------------------------------------------------------------------------------------------------------------------------------------------------------------------------|-------------------------------------------------------------------------------------------------------------------------------------------------------------------------------------------------------------------------------------------------------------------|
| EPI_ISL_676010                                                                                                                                                                                                                                                                                                                                                                                                                                                                                                                                                                                                                                                                                                                                                                                                                                                                                                                                                                                                                                                                                                                                                                                                                                                                                                                                                                                                                                                                                                                                                                                                                                                                                                                                                                                                                                                                                                                                                                                                                                                                                                                                                                                                                                                                                                                                                                                                                                                                                                                                                                                                                                                                                                                                                                                                                                                                                                                                                                                                                                                                                                                                                                                                                                                                                                                                                                                                                                                                                                                                                                                                                                                                                                                                                                                                                                                                                                                                                                                                                                                                                                                                                                                                                                                                                                                                                                                                                                                                                                                                                                                                                                                                                                                                                                                                                                                                                                                                                                                                 | Lighthouse Lab in Alderley Park | Wellcome Sanger Institute for the COVID-19 Genomics UK (COG-UK) Consortium | Jacquelyn Wynn, Mairead Hyland, The Lighthouse Lab in Alderley Park and Alex Alderton, Roberto Amato, Sonia Goncalves, Ewan Harrison, David K. Jackson, Ian Johnston, Dominic Kwiatkowski, Cordelia Langford, John Sillitoe on behalf of the Wellcome Sanger Institute COVID-19 Surveillance Team |                                                                                                                                                                                                                                                                   |
| EPI_ISL_676011, EPI_ISL_676012, EPI_ISL_676013, EPI_ISL_676014, EPI_ISL_676015, EPI_ISL_676016, EPI_ISL_676017, EPI_ISL_676018, EPI_ISL_676019, EPI_ISL_676020, EPI_ISL_676021, EPI_ISL_676022, EPI_ISL_676023, EPI_ISL_676024, EPI_ISL_676025, EPI_ISL_676026, EPI_ISL_676027, EPI_ISL_676028, EPI_ISL_676029, EPI_ISL_676030, EPI_ISL_676031, EPI_ISL_676032, EPI_ISL_676033, EPI_ISL_676034, EPI_ISL_676035, EPI_ISL_676036, EPI_ISL_676037, EPI_ISL_676038, EPI_ISL_676039, EPI_ISL_676040, EPI_ISL_676041, EPI_ISL_676042, EPI_ISL_676043, EPI_ISL_676044, EPI_ISL_676045, EPI_ISL_676046, EPI_ISL_676047, EPI_ISL_676048, EPI_ISL_676049, EPI_ISL_676050, EPI_ISL_676051, EPI_ISL_676052, EPI_ISL_676053, EPI_ISL_676054, EPI_ISL_676055, EPI_ISL_676056, EPI_ISL_676057, EPI_ISL_676058, EPI_ISL_676059, EPI_ISL_676060, EPI_ISL_676061, EPI_ISL_676062, EPI_ISL_676063, EPI_ISL_676064, EPI_ISL_676065, EPI_ISL_676066, EPI_ISL_676067, EPI_ISL_676068, EPI_ISL_676069, EPI_ISL_676070, EPI_ISL_676071, EPI_ISL_676072, EPI_ISL_676073, EPI_ISL_676074, EPI_ISL_676075, EPI_ISL_676076, EPI_ISL_676077, EPI_ISL_676078, EPI_ISL_676079, EPI_ISL_676080, EPI_ISL_676081, EPI_ISL_676082, EPI_ISL_676083, EPI_ISL_676084, EPI_ISL_676085, EPI_ISL_676086, EPI_ISL_676087, EPI_ISL_676088, EPI_ISL_676089, EPI_ISL_676090, EPI_ISL_676091, EPI_ISL_676092, EPI_ISL_676093, EPI_ISL_676094, EPI_ISL_676095, EPI_ISL_676096, EPI_ISL_676097, EPI_ISL_676098, EPI_ISL_676099, EPI_ISL_676100, EPI_ISL_676101, EPI_ISL_676102, EPI_ISL_676103, EPI_ISL_676104, EPI_ISL_676105, EPI_ISL_676106, EPI_ISL_676107, EPI_ISL_676108, EPI_ISL_676109, EPI_ISL_676110, EPI_ISL_676111, EPI_ISL_676112, EPI_ISL_676113, EPI_ISL_676114, EPI_ISL_676115, EPI_ISL_676116, EPI_ISL_676117, EPI_ISL_676118, EPI_ISL_676119, EPI_ISL_676120, EPI_ISL_676121, EPI_ISL_676122, EPI_ISL_676123, EPI_ISL_676124, EPI_ISL_676125, EPI_ISL_676126, EPI_ISL_676127, EPI_ISL_676128, EPI_ISL_676129, EPI_ISL_676130, EPI_ISL_676131, EPI_ISL_676132, EPI_ISL_676133, EPI_ISL_676134, EPI_ISL_676135, EPI_ISL_676136, EPI_ISL_676137, EPI_ISL_676138, EPI_ISL_676139, EPI_ISL_676140, EPI_ISL_676141, EPI_ISL_676142, EPI_ISL_676143, EPI_ISL_676144, EPI_ISL_676145, EPI_ISL_676146, EPI_ISL_676147, EPI_ISL_676148, EPI_ISL_676149, EPI_ISL_676150, EPI_ISL_676151, EPI_ISL_676152, EPI_ISL_676153, EPI_ISL_676154, EPI_ISL_676155, EPI_ISL_676156, EPI_ISL_676157, EPI_ISL_676158, EPI_ISL_676159, EPI_ISL_676160, EPI_ISL_676161, EPI_ISL_676162, EPI_ISL_676163, EPI_ISL_676164, EPI_ISL_676165, EPI_ISL_676166, EPI_ISL_676167, EPI_ISL_676168, EPI_ISL_676169, EPI_ISL_676170, EPI_ISL_676171, EPI_ISL_676172, EPI_ISL_676173, EPI_ISL_676174, EPI_ISL_676175, EPI_ISL_676176, EPI_ISL_676177, EPI_ISL_676178, EPI_ISL_676179, EPI_ISL_676180, EPI_ISL_676181, EPI_ISL_676182, EPI_ISL_676183, EPI_ISL_676184, EPI_ISL_676185, EPI_ISL_676186, EPI_ISL_676187, EPI_ISL_676188, EPI_ISL_676189, EPI_ISL_676190, EPI_ISL_676191, EPI_ISL_676192, EPI_ISL_676193, EPI_ISL_676194, EPI_ISL_676195, EPI_ISL_676196, EPI_ISL_676197, EPI_ISL_676198, EPI_ISL_676199, EPI_ISL_676200, EPI_ISL_676201, EPI_ISL_676202, EPI_ISL_676203, EPI_ISL_676204, EPI_ISL_676205, EPI_ISL_676206, EPI_ISL_676207, EPI_ISL_676208, EPI_ISL_676209, EPI_ISL_676210, EPI_ISL_676211, EPI_ISL_676212, EPI_ISL_676213, EPI_ISL_676214, EPI_ISL_676215, EPI_ISL_676216, EPI_ISL_676217, EPI_ISL_676218, EPI_ISL_676219, EPI_ISL_676220, EPI_ISL_676221, EPI_ISL_676222, EPI_ISL_676223, EPI_ISL_676224, EPI_ISL_676225, EPI_ISL_676226, EPI_ISL_676227, EPI_ISL_676228, EPI_ISL_676229, EPI_ISL_676230, EPI_ISL_676231, EPI_ISL_676232, EPI_ISL_676233, EPI_ISL_676234, EPI_ISL_676235, EPI_ISL_676236, EPI_ISL_676237, EPI_ISL_676238, EPI_ISL_676239, EPI_ISL_676240, EPI_ISL_676241, EPI_ISL_676242, EPI_ISL_676243, EPI_ISL_676244, EPI_ISL_676245, EPI_ISL_676246, EPI_ISL_676247, EPI_ISL_676248, EPI_ISL_676249, EPI_ISL_676250, EPI_ISL_676251, EPI_ISL_676252, EPI_ISL_676253, EPI_ISL_676254, EPI_ISL_676255, EPI_ISL_676256, EPI_ISL_676257, EPI_ISL_676258, EPI_ISL_676259, EPI_ISL_676260, EPI_ISL_676261, EPI_ISL_676262, EPI_ISL_676263, EPI_ISL_676264, EPI_ISL_676265, EPI_ISL_676266, EPI_ISL_676267, EPI_ISL_676268, EPI_ISL_676269, EPI_ISL_676270, EPI_ISL_676271, EPI_ISL_676272, EPI_ISL_676273, EPI_ISL_676274, EPI_ISL_676275, EPI_ISL_676276, EPI_ISL_676277, EPI_ISL_676278, EPI_ISL_676279, EPI_ISL_676280, EPI_ISL_676281, EPI_ISL_676282, EPI_ISL_676283, EPI_ISL_676284, EPI_ISL_676285, EPI_ISL_676286, EPI_ISL_676287, EPI_ISL_676288, EPI_ISL_676289, EPI_ISL_676290, EPI_ISL_676291, EPI_ISL_676292, EPI_ISL_676293, EPI_ISL_676294, EPI_ISL_676295, EPI_ISL_676296, EPI_ISL_676297, EPI_ISL_676298, EPI_ISL_676299, EPI_ISL_676300, EPI_ISL_676301, EPI_ISL_676302, EPI_ISL_676303, EPI_ISL_676304, EPI_ISL_676305, EPI_ISL_676306, EPI_ISL_676308, EPI_ISL_676309, EPI_ISL_676310, EPI_ISL_676311, EPI_ISL_676312 | see above                       | Lighthouse Lab in Milton Keynes                                            | Wellcome Sanger Institute for the COVID-19 Genomics UK (COG-UK) Consortium                                                                                                                                                                                                                        | The Lighthouse Lab in Milton Keynes and Alex Alderton, Roberto Amato, Sonia Goncalves, Ewan Harrison, David K. Jackson, Ian Johnston, Dominic Kwiatkowski, Cordelia Langford, John Sillitoe on behalf of the Wellcome Sanger Institute COVID-19 Surveillance Team |
| EPI_ISL_676313, EPI_ISL_676314, EPI_ISL_676315, EPI_ISL_676316, EPI_ISL_676317, EPI_ISL_676318, EPI_ISL_676319, EPI_ISL_676320, EPI_ISL_676321, EPI_ISL_676322, EPI_ISL_676323, EPI_ISL_676324, EPI_ISL_676325, EPI_ISL_676326, EPI_ISL_676327, EPI_ISL_676328, EPI_ISL_676329, EPI_ISL_676330, EPI_ISL_6763                                                                                                                                                                                                                                                                                                                                                                                                                                                                                                                                                                                                                                                                                                                                                                                                                                                                                                                                                                                                                                                                                                                                                                                                                                                                                                                                                                                                                                                                                                                                                                                                                                                                                                                                                                                                                                                                                                                                                                                                                                                                                                                                                                                                                                                                                                                                                                                                                                                                                                                                                                                                                                                                                                                                                                                                                                                                                                                                                                                                                                                                                                                                                                                                                                                                                                                                                                                                                                                                                                                                                                                                                                                                                                                                                                                                                                                                                                                                                                                                                                                                                                                                                                                                                                                                                                                                                                                                                                                                                                                                                                                                                                                                                                   |                                 |                                                                            |                                                                                                                                                                                                                                                                                                   |                                                                                                                                                                                                                                                                   |

[illegible]

| see above                                                                                                                                                                                                                                                                                                                                                                                                                                                                                                                                                                                                                                                                                                                                                                                                                                                                                                                                                                                                                                                                                                                                                                                                                                                                                                                                                                                                                                                                                                                                                                                                                                                                                                                                                                                                                                                                                                                                                                                                                                                                                                                                                                                                                                                                                                                                                                                                                                                                                                                                                                                                                                                                                                                                                                                                                                                                                                                                                                                                                                                                                                                                                                                                                                                                                                                                                                                                                                                                                                                                                                                                                                                                                                                                                                                                                                                                                                                                                                                                                                                                                                                                                                                                                                                                                                                                                                                                                                                                                                                                                                                                                                                                                                                                                                                                                                                                                                                                                                                                                                                                                                      | Virginia Division of Consolidated Laboratory Services              | Virginia Division of Consolidated Laboratory Services                                                                   | Virginia DCLS                                                                                                                                                                                                                                                    |
|----------------------------------------------------------------------------------------------------------------------------------------------------------------------------------------------------------------------------------------------------------------------------------------------------------------------------------------------------------------------------------------------------------------------------------------------------------------------------------------------------------------------------------------------------------------------------------------------------------------------------------------------------------------------------------------------------------------------------------------------------------------------------------------------------------------------------------------------------------------------------------------------------------------------------------------------------------------------------------------------------------------------------------------------------------------------------------------------------------------------------------------------------------------------------------------------------------------------------------------------------------------------------------------------------------------------------------------------------------------------------------------------------------------------------------------------------------------------------------------------------------------------------------------------------------------------------------------------------------------------------------------------------------------------------------------------------------------------------------------------------------------------------------------------------------------------------------------------------------------------------------------------------------------------------------------------------------------------------------------------------------------------------------------------------------------------------------------------------------------------------------------------------------------------------------------------------------------------------------------------------------------------------------------------------------------------------------------------------------------------------------------------------------------------------------------------------------------------------------------------------------------------------------------------------------------------------------------------------------------------------------------------------------------------------------------------------------------------------------------------------------------------------------------------------------------------------------------------------------------------------------------------------------------------------------------------------------------------------------------------------------------------------------------------------------------------------------------------------------------------------------------------------------------------------------------------------------------------------------------------------------------------------------------------------------------------------------------------------------------------------------------------------------------------------------------------------------------------------------------------------------------------------------------------------------------------------------------------------------------------------------------------------------------------------------------------------------------------------------------------------------------------------------------------------------------------------------------------------------------------------------------------------------------------------------------------------------------------------------------------------------------------------------------------------------------------------------------------------------------------------------------------------------------------------------------------------------------------------------------------------------------------------------------------------------------------------------------------------------------------------------------------------------------------------------------------------------------------------------------------------------------------------------------------------------------------------------------------------------------------------------------------------------------------------------------------------------------------------------------------------------------------------------------------------------------------------------------------------------------------------------------------------------------------------------------------------------------------------------------------------------------------------------------------------------------------------------------------------------------|--------------------------------------------------------------------|-------------------------------------------------------------------------------------------------------------------------|------------------------------------------------------------------------------------------------------------------------------------------------------------------------------------------------------------------------------------------------------------------|
| EPI_ISL_677243, EPI_ISL_677244, EPI_ISL_677245, EPI_ISL_677247, EPI_ISL_677248, EPI_ISL_677249, EPI_ISL_677250, EPI_ISL_677251, EPI_ISL_677256, EPI_ISL_677257, EPI_ISL_677262, EPI_ISL_677263, EPI_ISL_677265, EPI_ISL_677285, EPI_ISL_677293, EPI_ISL_677294, EPI_ISL_677295, EPI_ISL_677296, EPI_ISL_677297, EPI_ISL_677298, EPI_ISL_677300, EPI_ISL_677301, EPI_ISL_677302, EPI_ISL_677303, EPI_ISL_677304, EPI_ISL_677305, EPI_ISL_677306, EPI_ISL_677307, EPI_ISL_677308, EPI_ISL_677310, EPI_ISL_677311, EPI_ISL_677312, EPI_ISL_677313, EPI_ISL_677314, EPI_ISL_677315, EPI_ISL_677316, EPI_ISL_677317, EPI_ISL_677318, EPI_ISL_677319                                                                                                                                                                                                                                                                                                                                                                                                                                                                                                                                                                                                                                                                                                                                                                                                                                                                                                                                                                                                                                                                                                                                                                                                                                                                                                                                                                                                                                                                                                                                                                                                                                                                                                                                                                                                                                                                                                                                                                                                                                                                                                                                                                                                                                                                                                                                                                                                                                                                                                                                                                                                                                                                                                                                                                                                                                                                                                                                                                                                                                                                                                                                                                                                                                                                                                                                                                                                                                                                                                                                                                                                                                                                                                                                                                                                                                                                                                                                                                                                                                                                                                                                                                                                                                                                                                                                                                                                                                                                 |                                                                    |                                                                                                                         |                                                                                                                                                                                                                                                                  |
| see above                                                                                                                                                                                                                                                                                                                                                                                                                                                                                                                                                                                                                                                                                                                                                                                                                                                                                                                                                                                                                                                                                                                                                                                                                                                                                                                                                                                                                                                                                                                                                                                                                                                                                                                                                                                                                                                                                                                                                                                                                                                                                                                                                                                                                                                                                                                                                                                                                                                                                                                                                                                                                                                                                                                                                                                                                                                                                                                                                                                                                                                                                                                                                                                                                                                                                                                                                                                                                                                                                                                                                                                                                                                                                                                                                                                                                                                                                                                                                                                                                                                                                                                                                                                                                                                                                                                                                                                                                                                                                                                                                                                                                                                                                                                                                                                                                                                                                                                                                                                                                                                                                                      | Colorado Department of Public Health and Environment               | Colorado Department of Public Health and Environment                                                                    | Laura Bankers, Molly Hetherington-Rauth, Shannon Ely, Shannon R. Matzinger, Sarah Elizabeth Totten, Emily A. Travanty                                                                                                                                            |
| EPI_ISL_677320, EPI_ISL_677321, EPI_ISL_677322, EPI_ISL_677323, EPI_ISL_677324, EPI_ISL_677325, EPI_ISL_677326, EPI_ISL_677327, EPI_ISL_677328, EPI_ISL_677329, EPI_ISL_677330, EPI_ISL_677331, EPI_ISL_677332, EPI_ISL_677333, EPI_ISL_677334, EPI_ISL_677335, EPI_ISL_677336, EPI_ISL_677337, EPI_ISL_677338, EPI_ISL_677339, EPI_ISL_677340, EPI_ISL_677341, EPI_ISL_677342, EPI_ISL_677343, EPI_ISL_677344, EPI_ISL_677345, EPI_ISL_677346, EPI_ISL_677347, EPI_ISL_677348, EPI_ISL_677349, EPI_ISL_677350, EPI_ISL_677351, EPI_ISL_677352, EPI_ISL_677353, EPI_ISL_677354, EPI_ISL_677355, EPI_ISL_677356, EPI_ISL_677357, EPI_ISL_677358, EPI_ISL_677359, EPI_ISL_677360, EPI_ISL_677361, EPI_ISL_677362, EPI_ISL_677363, EPI_ISL_677364, EPI_ISL_677365, EPI_ISL_677366, EPI_ISL_677367, EPI_ISL_677368, EPI_ISL_677369, EPI_ISL_677370, EPI_ISL_677371, EPI_ISL_677372, EPI_ISL_677373, EPI_ISL_677374, EPI_ISL_677375, EPI_ISL_677376, EPI_ISL_677377, EPI_ISL_677378, EPI_ISL_677379, EPI_ISL_677380, EPI_ISL_677381, EPI_ISL_677382, EPI_ISL_677383, EPI_ISL_677384, EPI_ISL_677385, EPI_ISL_677387, EPI_ISL_677388, EPI_ISL_677389, EPI_ISL_677390, EPI_ISL_677391, EPI_ISL_677392, EPI_ISL_677393, EPI_ISL_677394, EPI_ISL_677395, EPI_ISL_677396, EPI_ISL_677397, EPI_ISL_677398, EPI_ISL_677399, EPI_ISL_677400, EPI_ISL_677401, EPI_ISL_677402, EPI_ISL_677403, EPI_ISL_677404, EPI_ISL_677405, EPI_ISL_677406, EPI_ISL_677407, EPI_ISL_677408, EPI_ISL_677409, EPI_ISL_677410, EPI_ISL_677411, EPI_ISL_677412, EPI_ISL_677413, EPI_ISL_677414, EPI_ISL_677415, EPI_ISL_677416, EPI_ISL_677417, EPI_ISL_677418, EPI_ISL_677419, EPI_ISL_677420, EPI_ISL_677421, EPI_ISL_677422, EPI_ISL_677423, EPI_ISL_677424, EPI_ISL_677425, EPI_ISL_677426, EPI_ISL_677427, EPI_ISL_677428, EPI_ISL_677429, EPI_ISL_677430, EPI_ISL_677431, EPI_ISL_677432, EPI_ISL_677433, EPI_ISL_677434, EPI_ISL_677435, EPI_ISL_677436, EPI_ISL_677437, EPI_ISL_677438, EPI_ISL_677439, EPI_ISL_677440, EPI_ISL_677441, EPI_ISL_677442, EPI_ISL_677443, EPI_ISL_677444, EPI_ISL_677445, EPI_ISL_677446, EPI_ISL_677447, EPI_ISL_677448, EPI_ISL_677449, EPI_ISL_677450, EPI_ISL_677451, EPI_ISL_677452, EPI_ISL_677453, EPI_ISL_677454, EPI_ISL_677455, EPI_ISL_677456, EPI_ISL_677457, EPI_ISL_677458, EPI_ISL_677459, EPI_ISL_677460, EPI_ISL_677461, EPI_ISL_677462, EPI_ISL_677463, EPI_ISL_677464, EPI_ISL_677465, EPI_ISL_677466, EPI_ISL_677467, EPI_ISL_677468, EPI_ISL_677469, EPI_ISL_677470, EPI_ISL_677471, EPI_ISL_677472, EPI_ISL_677473, EPI_ISL_677474, EPI_ISL_677475, EPI_ISL_677476, EPI_ISL_677477, EPI_ISL_677478, EPI_ISL_677479, EPI_ISL_677480, EPI_ISL_677481, EPI_ISL_677482, EPI_ISL_677483, EPI_ISL_677484, EPI_ISL_677485, EPI_ISL_677486, EPI_ISL_677487, EPI_ISL_677488, EPI_ISL_677489, EPI_ISL_677490, EPI_ISL_677491, EPI_ISL_677492, EPI_ISL_677493, EPI_ISL_677494, EPI_ISL_677495, EPI_ISL_677496, EPI_ISL_677497, EPI_ISL_677498, EPI_ISL_677499, EPI_ISL_677500, EPI_ISL_677501, EPI_ISL_677502, EPI_ISL_677503, EPI_ISL_677504, EPI_ISL_677505, EPI_ISL_677506, EPI_ISL_677507, EPI_ISL_677508, EPI_ISL_677509, EPI_ISL_677510, EPI_ISL_677511, EPI_ISL_677512, EPI_ISL_677513, EPI_ISL_677514, EPI_ISL_677515, EPI_ISL_677516, EPI_ISL_677517, EPI_ISL_677518, EPI_ISL_677519, EPI_ISL_677520, EPI_ISL_677521, EPI_ISL_677522, EPI_ISL_677523, EPI_ISL_677524, EPI_ISL_677525, EPI_ISL_677526, EPI_ISL_677527, EPI_ISL_677528, EPI_ISL_677529, EPI_ISL_677530, EPI_ISL_677531, EPI_ISL_677532, EPI_ISL_677533, EPI_ISL_677534, EPI_ISL_677535, EPI_ISL_677536, EPI_ISL_677537, EPI_ISL_677538, EPI_ISL_677539, EPI_ISL_677540, EPI_ISL_677541, EPI_ISL_677542, EPI_ISL_677543, EPI_ISL_677544, EPI_ISL_677545, EPI_ISL_677546, EPI_ISL_677547, EPI_ISL_677548, EPI_ISL_677549, EPI_ISL_677550, EPI_ISL_677551, EPI_ISL_677552, EPI_ISL_677553, EPI_ISL_677554, EPI_ISL_677555, EPI_ISL_677556, EPI_ISL_677557, EPI_ISL_677558, EPI_ISL_677559, EPI_ISL_677560, EPI_ISL_677561, EPI_ISL_677562, EPI_ISL_677564, EPI_ISL_677565, EPI_ISL_677566, EPI_ISL_677567, EPI_ISL_677568, EPI_ISL_677570, EPI_ISL_677571, EPI_ISL_677572, EPI_ISL_677573, EPI_ISL_677574, EPI_ISL_677576, EPI_ISL_677577, EPI_ISL_677578, EPI_ISL_677579, EPI_ISL_677580, EPI_ISL_677581, EPI_ISL_677582, EPI_ISL_677583, EPI_ISL_677585, EPI_ISL_677586, EPI_ISL_677587, EPI_ISL_677588, EPI_ISL_677589, EPI_ISL_677591, EPI_ISL_677592, EPI_ISL_677593, EPI_ISL_677595, EPI_ISL_677596, EPI_ISL_677597, EPI_ISL_677598, EPI_ISL_677599, EPI_ISL_677600, EPI_ISL_677601, EPI_ISL_677602, EPI_ISL_677603, EPI_ISL_677604, EPI_ISL_677605, EPI_ISL_677606, EPI_ISL_677607, EPI_ISL_677608, EPI_ISL_677609, EPI_ISL_677610, EPI_ISL_677611, EPI_ISL_677612, EPI_ISL_677613, EPI_ISL_677614, EPI_ISL_677615, EPI_ISL_677616, EPI_ISL_677617, EPI_ISL_677618, EPI_ISL_677619, EPI_ISL_677620, EPI_ISL_677621, EPI_ISL_677622, EPI_ISL_677623, EPI_ISL_677624, EPI_ISL_677625, EPI_ISL_677626, EPI_ISL_677627, EPI_ISL_677628, EPI_ISL_677629, EPI_ISL_677630, EPI_ISL_677631, EPI_ISL_677632, EPI_ISL_677633 |                                                                    |                                                                                                                         |                                                                                                                                                                                                                                                                  |
| see above                                                                                                                                                                                                                                                                                                                                                                                                                                                                                                                                                                                                                                                                                                                                                                                                                                                                                                                                                                                                                                                                                                                                                                                                                                                                                                                                                                                                                                                                                                                                                                                                                                                                                                                                                                                                                                                                                                                                                                                                                                                                                                                                                                                                                                                                                                                                                                                                                                                                                                                                                                                                                                                                                                                                                                                                                                                                                                                                                                                                                                                                                                                                                                                                                                                                                                                                                                                                                                                                                                                                                                                                                                                                                                                                                                                                                                                                                                                                                                                                                                                                                                                                                                                                                                                                                                                                                                                                                                                                                                                                                                                                                                                                                                                                                                                                                                                                                                                                                                                                                                                                                                      | University of Wisconsin-Madison AIDS Vaccine Research Laboratories | University of Wisconsin-Madison AIDS Vaccine Research Laboratories                                                      | Gage Moreno, Katarina Braun, et al. AIDS Vaccine Research Laboratories                                                                                                                                                                                           |
| EPI_ISL_677634                                                                                                                                                                                                                                                                                                                                                                                                                                                                                                                                                                                                                                                                                                                                                                                                                                                                                                                                                                                                                                                                                                                                                                                                                                                                                                                                                                                                                                                                                                                                                                                                                                                                                                                                                                                                                                                                                                                                                                                                                                                                                                                                                                                                                                                                                                                                                                                                                                                                                                                                                                                                                                                                                                                                                                                                                                                                                                                                                                                                                                                                                                                                                                                                                                                                                                                                                                                                                                                                                                                                                                                                                                                                                                                                                                                                                                                                                                                                                                                                                                                                                                                                                                                                                                                                                                                                                                                                                                                                                                                                                                                                                                                                                                                                                                                                                                                                                                                                                                                                                                                                                                 | Virology Unit, Institut Pasteur de Madagascar                      | Virology Unit, Institut Pasteur de Madagascar                                                                           | Christian Ranaivoson, Cara E. Brook, Vida Ahyong, Soa Fy Andriamandimby, Vololoniaina Raharinosy, Tsiry Randriambolanantsoa, Helisoa Razafimanjato, Norosoa Razanajatovo, Michelle Tan, Cristina M. Tato, Joseph L. DeRisi, Jean-Michel Heraud, Philippe Dussart |
| EPI_ISL_677638, EPI_ISL_677639, EPI_ISL_677640, EPI_ISL_677641, EPI_ISL_677642, EPI_ISL_677643, EPI_ISL_677644, EPI_ISL_677645, EPI_ISL_677646, EPI_ISL_677647, EPI_ISL_677648, EPI_ISL_677649, EPI_ISL_677650, EPI_ISL_677651, EPI_ISL_677652, EPI_ISL_677653, EPI_ISL_677654, EPI_ISL_677655, EPI_ISL_677656, EPI_ISL_677657                                                                                                                                                                                                                                                                                                                                                                                                                                                                                                                                                                                                                                                                                                                                                                                                                                                                                                                                                                                                                                                                                                                                                                                                                                                                                                                                                                                                                                                                                                                                                                                                                                                                                                                                                                                                                                                                                                                                                                                                                                                                                                                                                                                                                                                                                                                                                                                                                                                                                                                                                                                                                                                                                                                                                                                                                                                                                                                                                                                                                                                                                                                                                                                                                                                                                                                                                                                                                                                                                                                                                                                                                                                                                                                                                                                                                                                                                                                                                                                                                                                                                                                                                                                                                                                                                                                                                                                                                                                                                                                                                                                                                                                                                                                                                                                 |                                                                    |                                                                                                                         |                                                                                                                                                                                                                                                                  |
| see above                                                                                                                                                                                                                                                                                                                                                                                                                                                                                                                                                                                                                                                                                                                                                                                                                                                                                                                                                                                                                                                                                                                                                                                                                                                                                                                                                                                                                                                                                                                                                                                                                                                                                                                                                                                                                                                                                                                                                                                                                                                                                                                                                                                                                                                                                                                                                                                                                                                                                                                                                                                                                                                                                                                                                                                                                                                                                                                                                                                                                                                                                                                                                                                                                                                                                                                                                                                                                                                                                                                                                                                                                                                                                                                                                                                                                                                                                                                                                                                                                                                                                                                                                                                                                                                                                                                                                                                                                                                                                                                                                                                                                                                                                                                                                                                                                                                                                                                                                                                                                                                                                                      | Colorado Department of Public Health and Environment               | Colorado Department of Public Health and Environment                                                                    | Laura Bankers, Molly C. Hetherington-Rauth, Shannon Ely, Shannon R. Matzinger, Sarah Elizabeth Totten, Emily A. Travanty                                                                                                                                         |
| EPI_ISL_677658, EPI_ISL_677659, EPI_ISL_677660, EPI_ISL_677661, EPI_ISL_677662, EPI_ISL_677663                                                                                                                                                                                                                                                                                                                                                                                                                                                                                                                                                                                                                                                                                                                                                                                                                                                                                                                                                                                                                                                                                                                                                                                                                                                                                                                                                                                                                                                                                                                                                                                                                                                                                                                                                                                                                                                                                                                                                                                                                                                                                                                                                                                                                                                                                                                                                                                                                                                                                                                                                                                                                                                                                                                                                                                                                                                                                                                                                                                                                                                                                                                                                                                                                                                                                                                                                                                                                                                                                                                                                                                                                                                                                                                                                                                                                                                                                                                                                                                                                                                                                                                                                                                                                                                                                                                                                                                                                                                                                                                                                                                                                                                                                                                                                                                                                                                                                                                                                                                                                 | University of Wisconsin-Madison AIDS Vaccine Research Laboratories | University of Wisconsin-Madison AIDS Vaccine Research Laboratories                                                      | Gage Moreno, Katarina Braun, et al. AIDS Vaccine Research Laboratories                                                                                                                                                                                           |
| EPI_ISL_677668                                                                                                                                                                                                                                                                                                                                                                                                                                                                                                                                                                                                                                                                                                                                                                                                                                                                                                                                                                                                                                                                                                                                                                                                                                                                                                                                                                                                                                                                                                                                                                                                                                                                                                                                                                                                                                                                                                                                                                                                                                                                                                                                                                                                                                                                                                                                                                                                                                                                                                                                                                                                                                                                                                                                                                                                                                                                                                                                                                                                                                                                                                                                                                                                                                                                                                                                                                                                                                                                                                                                                                                                                                                                                                                                                                                                                                                                                                                                                                                                                                                                                                                                                                                                                                                                                                                                                                                                                                                                                                                                                                                                                                                                                                                                                                                                                                                                                                                                                                                                                                                                                                 | Wadsworth Center, New York State Department.of Health              | Wadsworth Center, New York State Department.of Health                                                                   | Kirsten St. George, Daryl M. Lamson, Alexis Russel, Jonathan Plitnick, Navjot Singh, John Kelly, Sara Griesemer, Erasmus Schneider, Erica Lasek-Nesselquist                                                                                                      |
| EPI_ISL_677669                                                                                                                                                                                                                                                                                                                                                                                                                                                                                                                                                                                                                                                                                                                                                                                                                                                                                                                                                                                                                                                                                                                                                                                                                                                                                                                                                                                                                                                                                                                                                                                                                                                                                                                                                                                                                                                                                                                                                                                                                                                                                                                                                                                                                                                                                                                                                                                                                                                                                                                                                                                                                                                                                                                                                                                                                                                                                                                                                                                                                                                                                                                                                                                                                                                                                                                                                                                                                                                                                                                                                                                                                                                                                                                                                                                                                                                                                                                                                                                                                                                                                                                                                                                                                                                                                                                                                                                                                                                                                                                                                                                                                                                                                                                                                                                                                                                                                                                                                                                                                                                                                                 | Masonic Medical Research Institute                                 | Wadsworth Center, New York State Department.of Health                                                                   | Nathan Tucker, Kirsten St. George, Daryl M. Lamson, Alexis Russel, Jonathan Plitnick, Navjot Singh, John Kelly, Sara Griesemer, Erasmus Schneider, Erica Lasek-Nesselquist                                                                                       |
| EPI_ISL_677670, EPI_ISL_677671                                                                                                                                                                                                                                                                                                                                                                                                                                                                                                                                                                                                                                                                                                                                                                                                                                                                                                                                                                                                                                                                                                                                                                                                                                                                                                                                                                                                                                                                                                                                                                                                                                                                                                                                                                                                                                                                                                                                                                                                                                                                                                                                                                                                                                                                                                                                                                                                                                                                                                                                                                                                                                                                                                                                                                                                                                                                                                                                                                                                                                                                                                                                                                                                                                                                                                                                                                                                                                                                                                                                                                                                                                                                                                                                                                                                                                                                                                                                                                                                                                                                                                                                                                                                                                                                                                                                                                                                                                                                                                                                                                                                                                                                                                                                                                                                                                                                                                                                                                                                                                                                                 | Wadsworth Center, New York State Department.of Health              | Wadsworth Center, New York State Department.of Health                                                                   | Kirsten St. George, Daryl M. Lamson, Alexis Russel, Jonathan Plitnick, Navjot Singh, John Kelly, Sara Griesemer, Erasmus Schneider, Erica Lasek-Nesselquist                                                                                                      |
| EPI_ISL_677675                                                                                                                                                                                                                                                                                                                                                                                                                                                                                                                                                                                                                                                                                                                                                                                                                                                                                                                                                                                                                                                                                                                                                                                                                                                                                                                                                                                                                                                                                                                                                                                                                                                                                                                                                                                                                                                                                                                                                                                                                                                                                                                                                                                                                                                                                                                                                                                                                                                                                                                                                                                                                                                                                                                                                                                                                                                                                                                                                                                                                                                                                                                                                                                                                                                                                                                                                                                                                                                                                                                                                                                                                                                                                                                                                                                                                                                                                                                                                                                                                                                                                                                                                                                                                                                                                                                                                                                                                                                                                                                                                                                                                                                                                                                                                                                                                                                                                                                                                                                                                                                                                                 | General Hospital - Veles                                           | Research Center for Genetic Engineering and Biotechnology "Georgi D. Efremov" , Macedonian Academy of Sciences and Arts | RCGEB - MASA                                                                                                                                                                                                                                                     |
| EPI_ISL_677676, EPI_ISL_677677                                                                                                                                                                                                                                                                                                                                                                                                                                                                                                                                                                                                                                                                                                                                                                                                                                                                                                                                                                                                                                                                                                                                                                                                                                                                                                                                                                                                                                                                                                                                                                                                                                                                                                                                                                                                                                                                                                                                                                                                                                                                                                                                                                                                                                                                                                                                                                                                                                                                                                                                                                                                                                                                                                                                                                                                                                                                                                                                                                                                                                                                                                                                                                                                                                                                                                                                                                                                                                                                                                                                                                                                                                                                                                                                                                                                                                                                                                                                                                                                                                                                                                                                                                                                                                                                                                                                                                                                                                                                                                                                                                                                                                                                                                                                                                                                                                                                                                                                                                                                                                                                                 | Clinical Hospital - Shtip                                          | Research Center for Genetic Engineering and Biotechnology "Georgi D. Efremov" , Macedonian Academy of Sciences and Arts | RCGEB - MASA                                                                                                                                                                                                                                                     |
| EPI_ISL_677695, EPI_ISL_677696, EPI_ISL_677699                                                                                                                                                                                                                                                                                                                                                                                                                                                                                                                                                                                                                                                                                                                                                                                                                                                                                                                                                                                                                                                                                                                                                                                                                                                                                                                                                                                                                                                                                                                                                                                                                                                                                                                                                                                                                                                                                                                                                                                                                                                                                                                                                                                                                                                                                                                                                                                                                                                                                                                                                                                                                                                                                                                                                                                                                                                                                                                                                                                                                                                                                                                                                                                                                                                                                                                                                                                                                                                                                                                                                                                                                                                                                                                                                                                                                                                                                                                                                                                                                                                                                                                                                                                                                                                                                                                                                                                                                                                                                                                                                                                                                                                                                                                                                                                                                                                                                                                                                                                                                                                                 | Vanda Pharmaceuticals Clinical Site                                | Vanda Pharmaceuticals                                                                                                   | Vanda Pharmaceuticals                                                                                                                                                                                                                                            |
| EPI_ISL_677700, EPI_ISL_677701, EPI_ISL_677702                                                                                                                                                                                                                                                                                                                                                                                                                                                                                                                                                                                                                                                                                                                                                                                                                                                                                                                                                                                                                                                                                                                                                                                                                                                                                                                                                                                                                                                                                                                                                                                                                                                                                                                                                                                                                                                                                                                                                                                                                                                                                                                                                                                                                                                                                                                                                                                                                                                                                                                                                                                                                                                                                                                                                                                                                                                                                                                                                                                                                                                                                                                                                                                                                                                                                                                                                                                                                                                                                                                                                                                                                                                                                                                                                                                                                                                                                                                                                                                                                                                                                                                                                                                                                                                                                                                                                                                                                                                                                                                                                                                                                                                                                                                                                                                                                                                                                                                                                                                                                                                                 | Center for public health - Skopje                                  | Research Center for Genetic Engineering and Biotechnology "Georgi D. Efremov" , Macedonian Academy of Sciences and Arts | RCGEB - MASA                                                                                                                                                                                                                                                     |
| EPI_ISL_677703                                                                                                                                                                                                                                                                                                                                                                                                                                                                                                                                                                                                                                                                                                                                                                                                                                                                                                                                                                                                                                                                                                                                                                                                                                                                                                                                                                                                                                                                                                                                                                                                                                                                                                                                                                                                                                                                                                                                                                                                                                                                                                                                                                                                                                                                                                                                                                                                                                                                                                                                                                                                                                                                                                                                                                                                                                                                                                                                                                                                                                                                                                                                                                                                                                                                                                                                                                                                                                                                                                                                                                                                                                                                                                                                                                                                                                                                                                                                                                                                                                                                                                                                                                                                                                                                                                                                                                                                                                                                                                                                                                                                                                                                                                                                                                                                                                                                                                                                                                                                                                                                                                 | General Hospital - Prilep                                          | Research Center for Genetic Engineering and Biotechnology "Georgi D. Efremov" , Macedonian Academy of Sciences and Arts | RCGEB - MASA                                                                                                                                                                                                                                                     |
| EPI_ISL_677704                                                                                                                                                                                                                                                                                                                                                                                                                                                                                                                                                                                                                                                                                                                                                                                                                                                                                                                                                                                                                                                                                                                                                                                                                                                                                                                                                                                                                                                                                                                                                                                                                                                                                                                                                                                                                                                                                                                                                                                                                                                                                                                                                                                                                                                                                                                                                                                                                                                                                                                                                                                                                                                                                                                                                                                                                                                                                                                                                                                                                                                                                                                                                                                                                                                                                                                                                                                                                                                                                                                                                                                                                                                                                                                                                                                                                                                                                                                                                                                                                                                                                                                                                                                                                                                                                                                                                                                                                                                                                                                                                                                                                                                                                                                                                                                                                                                                                                                                                                                                                                                                                                 | General Hospital - Ohrid                                           | Research Center for Genetic Engineering and Biotechnology "Georgi D. Efremov" , Macedonian Academy of Sciences and Arts | RCGEB - MASA                                                                                                                                                                                                                                                     |
| EPI_ISL_677705                                                                                                                                                                                                                                                                                                                                                                                                                                                                                                                                                                                                                                                                                                                                                                                                                                                                                                                                                                                                                                                                                                                                                                                                                                                                                                                                                                                                                                                                                                                                                                                                                                                                                                                                                                                                                                                                                                                                                                                                                                                                                                                                                                                                                                                                                                                                                                                                                                                                                                                                                                                                                                                                                                                                                                                                                                                                                                                                                                                                                                                                                                                                                                                                                                                                                                                                                                                                                                                                                                                                                                                                                                                                                                                                                                                                                                                                                                                                                                                                                                                                                                                                                                                                                                                                                                                                                                                                                                                                                                                                                                                                                                                                                                                                                                                                                                                                                                                                                                                                                                                                                                 | General Hospital - Kumanovo                                        | Research Center for Genetic Engineering and Biotechnology "Georgi D. Efremov" , Macedonian Academy of Sciences and Arts | RCGEB - MASA                                                                                                                                                                                                                                                     |
| EPI_ISL_677706                                                                                                                                                                                                                                                                                                                                                                                                                                                                                                                                                                                                                                                                                                                                                                                                                                                                                                                                                                                                                                                                                                                                                                                                                                                                                                                                                                                                                                                                                                                                                                                                                                                                                                                                                                                                                                                                                                                                                                                                                                                                                                                                                                                                                                                                                                                                                                                                                                                                                                                                                                                                                                                                                                                                                                                                                                                                                                                                                                                                                                                                                                                                                                                                                                                                                                                                                                                                                                                                                                                                                                                                                                                                                                                                                                                                                                                                                                                                                                                                                                                                                                                                                                                                                                                                                                                                                                                                                                                                                                                                                                                                                                                                                                                                                                                                                                                                                                                                                                                                                                                                                                 | Center for public health - Skopje                                  | Research Center for Genetic Engineering and Biotechnology "Georgi D. Efremov" , Macedonian Academy of Sciences and Arts | RCGEB - MASA                                                                                                                                                                                                                                                     |
| EPI_ISL_677707                                                                                                                                                                                                                                                                                                                                                                                                                                                                                                                                                                                                                                                                                                                                                                                                                                                                                                                                                                                                                                                                                                                                                                                                                                                                                                                                                                                                                                                                                                                                                                                                                                                                                                                                                                                                                                                                                                                                                                                                                                                                                                                                                                                                                                                                                                                                                                                                                                                                                                                                                                                                                                                                                                                                                                                                                                                                                                                                                                                                                                                                                                                                                                                                                                                                                                                                                                                                                                                                                                                                                                                                                                                                                                                                                                                                                                                                                                                                                                                                                                                                                                                                                                                                                                                                                                                                                                                                                                                                                                                                                                                                                                                                                                                                                                                                                                                                                                                                                                                                                                                                                                 | General Hospital - Kumanovo                                        | Research Center for Genetic Engineering and Biotechnology "Georgi D. Efremov" , Macedonian Academy of Sciences and Arts | RCGEB - MASA                                                                                                                                                                                                                                                     |
| EPI_ISL_677708                                                                                                                                                                                                                                                                                                                                                                                                                                                                                                                                                                                                                                                                                                                                                                                                                                                                                                                                                                                                                                                                                                                                                                                                                                                                                                                                                                                                                                                                                                                                                                                                                                                                                                                                                                                                                                                                                                                                                                                                                                                                                                                                                                                                                                                                                                                                                                                                                                                                                                                                                                                                                                                                                                                                                                                                                                                                                                                                                                                                                                                                                                                                                                                                                                                                                                                                                                                                                                                                                                                                                                                                                                                                                                                                                                                                                                                                                                                                                                                                                                                                                                                                                                                                                                                                                                                                                                                                                                                                                                                                                                                                                                                                                                                                                                                                                                                                                                                                                                                                                                                                                                 | Center for public health - Skopje                                  | Research Center for Genetic Engineering and Biotechnology "Georgi D. Efremov" , Macedonian Academy of Sciences and Arts | RCGEB - MASA                                                                                                                                                                                                                                                     |
| EPI_ISL_677709                                                                                                                                                                                                                                                                                                                                                                                                                                                                                                                                                                                                                                                                                                                                                                                                                                                                                                                                                                                                                                                                                                                                                                                                                                                                                                                                                                                                                                                                                                                                                                                                                                                                                                                                                                                                                                                                                                                                                                                                                                                                                                                                                                                                                                                                                                                                                                                                                                                                                                                                                                                                                                                                                                                                                                                                                                                                                                                                                                                                                                                                                                                                                                                                                                                                                                                                                                                                                                                                                                                                                                                                                                                                                                                                                                                                                                                                                                                                                                                                                                                                                                                                                                                                                                                                                                                                                                                                                                                                                                                                                                                                                                                                                                                                                                                                                                                                                                                                                                                                                                                                                                 | General Hospital - Ohrid                                           | Research Center for Genetic Engineering and Biotechnology "Georgi D. Efremov" , Macedonian Academy of Sciences and Arts | RCGEB - MASA                                                                                                                                                                                                                                                     |
| EPI_ISL_677710                                                                                                                                                                                                                                                                                                                                                                                                                                                                                                                                                                                                                                                                                                                                                                                                                                                                                                                                                                                                                                                                                                                                                                                                                                                                                                                                                                                                                                                                                                                                                                                                                                                                                                                                                                                                                                                                                                                                                                                                                                                                                                                                                                                                                                                                                                                                                                                                                                                                                                                                                                                                                                                                                                                                                                                                                                                                                                                                                                                                                                                                                                                                                                                                                                                                                                                                                                                                                                                                                                                                                                                                                                                                                                                                                                                                                                                                                                                                                                                                                                                                                                                                                                                                                                                                                                                                                                                                                                                                                                                                                                                                                                                                                                                                                                                                                                                                                                                                                                                                                                                                                                 | General Hospital - Veles                                           | Research Center for Genetic Engineering and Biotechnology "Georgi D. Efremov" , Macedonian Academy of Sciences and Arts | RCGEB - MASA                                                                                                                                                                                                                                                     |
| EPI_ISL_677711                                                                                                                                                                                                                                                                                                                                                                                                                                                                                                                                                                                                                                                                                                                                                                                                                                                                                                                                                                                                                                                                                                                                                                                                                                                                                                                                                                                                                                                                                                                                                                                                                                                                                                                                                                                                                                                                                                                                                                                                                                                                                                                                                                                                                                                                                                                                                                                                                                                                                                                                                                                                                                                                                                                                                                                                                                                                                                                                                                                                                                                                                                                                                                                                                                                                                                                                                                                                                                                                                                                                                                                                                                                                                                                                                                                                                                                                                                                                                                                                                                                                                                                                                                                                                                                                                                                                                                                                                                                                                                                                                                                                                                                                                                                                                                                                                                                                                                                                                                                                                                                                                                 | General Hospital - Ohrid                                           | Research Center for Genetic Engineering and Biotechnology "Georgi D. Efremov" , Macedonian Academy of Sciences and Arts | RCGEB - MASA                                                                                                                                                                                                                                                     |











|                                                                                                                                                                                                                                                                                                                                                                                                                                                                                                                                                                                                                                                                |                                                                                  |                                                                                                                         |                                                                                                                                                                                                                                                  |
|----------------------------------------------------------------------------------------------------------------------------------------------------------------------------------------------------------------------------------------------------------------------------------------------------------------------------------------------------------------------------------------------------------------------------------------------------------------------------------------------------------------------------------------------------------------------------------------------------------------------------------------------------------------|----------------------------------------------------------------------------------|-------------------------------------------------------------------------------------------------------------------------|--------------------------------------------------------------------------------------------------------------------------------------------------------------------------------------------------------------------------------------------------|
| EPI_ISL_678236                                                                                                                                                                                                                                                                                                                                                                                                                                                                                                                                                                                                                                                 | Pathogen Genomics Lab King Abdullah University of Science and Technology(KAUST)  | Pathogen Genomics Lab King Abdullah University of Science and Technology(KAUST)                                         | Sara Mfarrej, Luke Esau, Amanda Ooi, Sharif Hala, Raecee Naeem, Afrah Alsomali, Fadwa Alofi, Asim Khogeer, Jumana Taha, Abdulaziz Alahmadi, Kahled Alghithami, Anwar Hashem, Naif Almontashiri, Arnab Pain                                       |
| EPI_ISL_678237                                                                                                                                                                                                                                                                                                                                                                                                                                                                                                                                                                                                                                                 | Pathogen Genomics Lab King Abdullah University of Science and Technology(KAUST)  | Pathogen Genomics Lab King Abdullah University of Science and Technology(KAUST)                                         | Sara Mfarrej, Olga Douvropoulou, Raushan Nugmanova, Sharif Hala, Raecee Naeem, Amanda Ooi, Luke Esau, Fadwa Alofi, Afrah Alsomali, Asim Khogeer, Jumana Taha, Abdulaziz Alahmadi, Kahled Alghithami, Anwar Hashem, Naif Almontashiri, Arnab Pain |
| EPI_ISL_678238                                                                                                                                                                                                                                                                                                                                                                                                                                                                                                                                                                                                                                                 | Pathogen Genomics Lab King Abdullah University of Science and Technology(KAUST)  | Pathogen Genomics Lab King Abdullah University of Science and Technology(KAUST)                                         | Muhammad Shuaib, Sara Mfarrej, Amanda Ooi, Luke Esau, Sharif Hala, Raecee Naeem, Awad Al-Omari, Samer Salih, Abbas Al Mutair, Arnab Pain                                                                                                         |
| EPI_ISL_678239                                                                                                                                                                                                                                                                                                                                                                                                                                                                                                                                                                                                                                                 | Pathogen Genomics Lab King Abdullah University of Science and Technology(KAUST)  | Pathogen Genomics Lab King Abdullah University of Science and Technology(KAUST)                                         | Muhammad Shuaib, Raecee Naeem, Sara Mfarrej, Olga Douvropoulou, Raushan Nugmanova, Sharif Hala, Awad Al-Omari, Samer Salih, Abbas Al Mutair, Arnab Pain                                                                                          |
| EPI_ISL_678240                                                                                                                                                                                                                                                                                                                                                                                                                                                                                                                                                                                                                                                 | Pathogen Genomics Lab King Abdullah University of Science and Technology(KAUST)  | Pathogen Genomics Lab King Abdullah University of Science and Technology(KAUST)                                         | Sara Mfarrej, Raushan Nugmanova, Olga Douvropoulou, Raecee Naeem, Sharif Hala, Luke Esau, Amanda Ooi, Awad Al-Omari, Samer Salih, Abbas Al Mutair, Arnab Pain                                                                                    |
| EPI_ISL_678241                                                                                                                                                                                                                                                                                                                                                                                                                                                                                                                                                                                                                                                 | Pathogen Genomics Lab King Abdullah University of Science and Technology(KAUST)  | Pathogen Genomics Lab King Abdullah University of Science and Technology(KAUST)                                         | Muhammad Shuaib, Raecee Naeem, Raushan Nugmanova, Olga Douvropoulou, Sharif Hala, Sara Mfarrej, Afrah Alsomali, Asim Khogeer, Fadwa Alofi, Jumana Taha, Abdulaziz Alahmadi, Kahled Alghithami, Anwar Hashem, Naif Almontashiri, Arnab Pain       |
| EPI_ISL_678242                                                                                                                                                                                                                                                                                                                                                                                                                                                                                                                                                                                                                                                 | Pathogen Genomics Lab King Abdullah University of Science and Technology(KAUST)  | Pathogen Genomics Lab King Abdullah University of Science and Technology(KAUST)                                         | Muhammad Shuaib, Sharif Hala, Sara Mfarrej, Luke Esau, Amanda Ooi, Raecee Naeem, Afrah Alsomali, Asim Khogeer, Fadwa Alofi, Jumana Taha, Abdulaziz Alahmadi, Kahled Alghithami, Anwar Hashem, Naif Almontashiri, Arnab Pain                      |
| EPI_ISL_678243                                                                                                                                                                                                                                                                                                                                                                                                                                                                                                                                                                                                                                                 | Pathogen Genomics Lab King Abdullah University of Science and Technology(KAUST)  | Pathogen Genomics Lab King Abdullah University of Science and Technology(KAUST)                                         | Sara Mfarrej, Raecee Naeem, Raushan Nugmanova, Olga Douvropoulou, Luke Esau, Amanda Ooi, Sharif Hala, Afrah Alsomali, Asim Khogeer, Fadwa Alofi, Jumana Taha, Abdulaziz Alahmadi, Kahled Alghithami, Anwar Hashem, Naif Almontashiri, Arnab Pain |
| EPI_ISL_678244                                                                                                                                                                                                                                                                                                                                                                                                                                                                                                                                                                                                                                                 | Pathogen Genomics Lab King Abdullah University of Science and Technology(KAUST)  | Pathogen Genomics Lab King Abdullah University of Science and Technology(KAUST)                                         | Sara Mfarrej, Olga Douvropoulou, Raushan Nugmanova, Raecee Naeem, Sharif Hala, Awad Al-Omari, Samer Salih, Abbas Al Mutair, Arnab Pain                                                                                                           |
| EPI_ISL_678245                                                                                                                                                                                                                                                                                                                                                                                                                                                                                                                                                                                                                                                 | Pathogen Genomics Lab King Abdullah University of Science and Technology(KAUST)  | Pathogen Genomics Lab King Abdullah University of Science and Technology(KAUST)                                         | Sara Mfarrej, Luke Esau, Amanda Ooi, Sharif Hala, Raecee Naeem, Awad Al-Omari, Samer Salih, Abbas Al Mutair, Arnab Pain                                                                                                                          |
| EPI_ISL_678247                                                                                                                                                                                                                                                                                                                                                                                                                                                                                                                                                                                                                                                 | Pathogen Genomics Lab King Abdullah University of Science and Technology (KAUST) | Pathogen Genomics Lab King Abdullah University of Science and Technology (KAUST)                                        | Muhammad Shuaib, Raecee Naeem, Sara Mfarrej, Olga Douvropoulou, Raushan Nugmanova, Sharif Hala, Awad Al-Omari, Samer Salih, Abbas Al Mutair, Arnab Pain                                                                                          |
| EPI_ISL_678248, EPI_ISL_678249                                                                                                                                                                                                                                                                                                                                                                                                                                                                                                                                                                                                                                 | Center for public health - Skopje                                                | Research Center for Genetic Engineering and Biotechnology "Georgi D. Efremov" , Macedonian Academy of Sciences and Arts | RCGEB - MASA                                                                                                                                                                                                                                     |
| EPI_ISL_678250                                                                                                                                                                                                                                                                                                                                                                                                                                                                                                                                                                                                                                                 | Clinical Hospital - Shtip                                                        | Research Center for Genetic Engineering and Biotechnology "Georgi D. Efremov" , Macedonian Academy of Sciences and Arts | RCGEB - MASA                                                                                                                                                                                                                                     |
| EPI_ISL_678251                                                                                                                                                                                                                                                                                                                                                                                                                                                                                                                                                                                                                                                 | Institute for Lung Diseases in Children - Skopje                                 | Research Center for Genetic Engineering and Biotechnology "Georgi D. Efremov" , Macedonian Academy of Sciences and Arts | RCGEB - MASA                                                                                                                                                                                                                                     |
| EPI_ISL_678252                                                                                                                                                                                                                                                                                                                                                                                                                                                                                                                                                                                                                                                 | General Hospital - Kumanovo                                                      | Research Center for Genetic Engineering and Biotechnology "Georgi D. Efremov" , Macedonian Academy of Sciences and Arts | RCGEB - MASA                                                                                                                                                                                                                                     |
| EPI_ISL_678253                                                                                                                                                                                                                                                                                                                                                                                                                                                                                                                                                                                                                                                 | Institute for Lung Diseases in Children - Skopje                                 | Research Center for Genetic Engineering and Biotechnology "Georgi D. Efremov" , Macedonian Academy of Sciences and Arts | RCGEB - MASA                                                                                                                                                                                                                                     |
| EPI_ISL_678254                                                                                                                                                                                                                                                                                                                                                                                                                                                                                                                                                                                                                                                 | General Hospital - Strumica                                                      | Research Center for Genetic Engineering and Biotechnology "Georgi D. Efremov" , Macedonian Academy of Sciences and Arts | RCGEB - MASA                                                                                                                                                                                                                                     |
| EPI_ISL_678255, EPI_ISL_678256                                                                                                                                                                                                                                                                                                                                                                                                                                                                                                                                                                                                                                 | General Hospital - Ohrid                                                         | Research Center for Genetic Engineering and Biotechnology "Georgi D. Efremov" , Macedonian Academy of Sciences and Arts | RCGEB - MASA                                                                                                                                                                                                                                     |
| EPI_ISL_678257                                                                                                                                                                                                                                                                                                                                                                                                                                                                                                                                                                                                                                                 | PHI Institute of Nephrology - Struga                                             | Research Center for Genetic Engineering and Biotechnology "Georgi D. Efremov" , Macedonian Academy of Sciences and Arts | RCGEB - MASA                                                                                                                                                                                                                                     |
| EPI_ISL_678258                                                                                                                                                                                                                                                                                                                                                                                                                                                                                                                                                                                                                                                 | General Hospital - Prilep                                                        | Research Center for Genetic Engineering and Biotechnology "Georgi D. Efremov" , Macedonian Academy of Sciences and Arts | RCGEB - MASA                                                                                                                                                                                                                                     |
| EPI_ISL_678259                                                                                                                                                                                                                                                                                                                                                                                                                                                                                                                                                                                                                                                 | Clinical Hospital - Shtip                                                        | Research Center for Genetic Engineering and Biotechnology "Georgi D. Efremov" , Macedonian Academy of Sciences and Arts | RCGEB - MASA                                                                                                                                                                                                                                     |
| EPI_ISL_678260                                                                                                                                                                                                                                                                                                                                                                                                                                                                                                                                                                                                                                                 | General Hospital - Struga                                                        | Research Center for Genetic Engineering and Biotechnology "Georgi D. Efremov" , Macedonian Academy of Sciences and Arts | RCGEB - MASA                                                                                                                                                                                                                                     |
| EPI_ISL_678261, EPI_ISL_678262, EPI_ISL_678263, EPI_ISL_678264, EPI_ISL_678265, EPI_ISL_678266, EPI_ISL_678267, EPI_ISL_678268, EPI_ISL_678269, EPI_ISL_678270, EPI_ISL_678271, EPI_ISL_678272                                                                                                                                                                                                                                                                                                                                                                                                                                                                 | see above                                                                        | Communicable Disease Laboratory, Public Health Directorate                                                              | Alwasti,H., Altaif,Z., AlHujairi,Z., AlAbbas,Z.                                                                                                                                                                                                  |
| EPI_ISL_678274, EPI_ISL_678281, EPI_ISL_678282, EPI_ISL_678284, EPI_ISL_678285, EPI_ISL_678286, EPI_ISL_678289                                                                                                                                                                                                                                                                                                                                                                                                                                                                                                                                                 | Mikrobiologie, RARI                                                              | Mikrobiologie, RARI                                                                                                     | Krasnov,Y.M., Naryshkina,E.A., Guseva,N.P., Sosedova,E.A., Fedorov,A.V., Badanin,D.V., Sharapova,N.A., Portenko,S.A., Shcherbakova,S.A., Kutuyrev,V.V.                                                                                           |
| EPI_ISL_678290, EPI_ISL_678291                                                                                                                                                                                                                                                                                                                                                                                                                                                                                                                                                                                                                                 | University of Szeged, Institute of Clinical Microbiology                         | National Laboratory of Virology, Szentágotthai Research Centre                                                          | Endre Gábor Tóth, Balázs Somogyi, Brigitta, Gabriella Terhes, Ferenc Jakab, Gábor Kemenesi                                                                                                                                                       |
| EPI_ISL_678318, EPI_ISL_678320, EPI_ISL_678321, EPI_ISL_678325, EPI_ISL_678326, EPI_ISL_678327, EPI_ISL_678328, EPI_ISL_678330, EPI_ISL_678331, EPI_ISL_678332, EPI_ISL_678336, EPI_ISL_678337, EPI_ISL_678340, EPI_ISL_678342, EPI_ISL_678343, EPI_ISL_678345, EPI_ISL_678346, EPI_ISL_678348, EPI_ISL_678351, EPI_ISL_678358, EPI_ISL_678363, EPI_ISL_678364, EPI_ISL_678365, EPI_ISL_678366, EPI_ISL_678367, EPI_ISL_678368, EPI_ISL_678370, EPI_ISL_678371, EPI_ISL_678372, EPI_ISL_678373, EPI_ISL_678374, EPI_ISL_678375, EPI_ISL_678376, EPI_ISL_678377, EPI_ISL_678378, EPI_ISL_678379, EPI_ISL_678380, EPI_ISL_678381, EPI_ISL_678383, EPI_ISL_678386 | see above                                                                        | Area of Virology, Serology and Virology Division (SAVID), New South Wales Health Pathology Randwick                     | Foster, C.; Au, J.; Ruiz Silva, M.; Deveson, I.; Bull, R.; Van Hal, S.; Rawlinson, W.                                                                                                                                                            |
| EPI_ISL_678387, EPI_ISL_678388, EPI_ISL_678389, EPI_ISL_678390,                                                                                                                                                                                                                                                                                                                                                                                                                                                                                                                                                                                                | University of Debrecen, Department of Medical Microbiology                       | National Laboratory of Virology, Szentágotthai Research Centre                                                          | Endre Gábor Tóth, Balázs Somogyi, Brigitta Zana, Eszter Csoma, Ferenc Jakab, Gábor Kemenesi                                                                                                                                                      |











|                                                                                                                                                                                                                                                                                                                                                                                                                                                                                                                                                                                                                                                                                                                                                                                                                                                                                                                                                                                                                                                                                                                                                                                                                                                                                                                                                                                                                                                                                                                                                                                                                                                                                                                                                                                                                                                                                                                                                                                                                                                                                                                                                                                                                                                                                                                                                                                                                                                                                                                                                                                                |                                                              |                                                                                     |                                                                                                                                                     |
|------------------------------------------------------------------------------------------------------------------------------------------------------------------------------------------------------------------------------------------------------------------------------------------------------------------------------------------------------------------------------------------------------------------------------------------------------------------------------------------------------------------------------------------------------------------------------------------------------------------------------------------------------------------------------------------------------------------------------------------------------------------------------------------------------------------------------------------------------------------------------------------------------------------------------------------------------------------------------------------------------------------------------------------------------------------------------------------------------------------------------------------------------------------------------------------------------------------------------------------------------------------------------------------------------------------------------------------------------------------------------------------------------------------------------------------------------------------------------------------------------------------------------------------------------------------------------------------------------------------------------------------------------------------------------------------------------------------------------------------------------------------------------------------------------------------------------------------------------------------------------------------------------------------------------------------------------------------------------------------------------------------------------------------------------------------------------------------------------------------------------------------------------------------------------------------------------------------------------------------------------------------------------------------------------------------------------------------------------------------------------------------------------------------------------------------------------------------------------------------------------------------------------------------------------------------------------------------------|--------------------------------------------------------------|-------------------------------------------------------------------------------------|-----------------------------------------------------------------------------------------------------------------------------------------------------|
| EPI_ISL_682060, EPI_ISL_682061, EPI_ISL_682062, EPI_ISL_682063, EPI_ISL_682064, EPI_ISL_682065, EPI_ISL_682066, EPI_ISL_682067, EPI_ISL_682068, EPI_ISL_682069, EPI_ISL_682070, EPI_ISL_682071, EPI_ISL_682072, EPI_ISL_682073, EPI_ISL_682074, EPI_ISL_682075, EPI_ISL_682076, EPI_ISL_682077, EPI_ISL_682078                                                                                                                                                                                                                                                                                                                                                                                                                                                                                                                                                                                                                                                                                                                                                                                                                                                                                                                                                                                                                                                                                                                                                                                                                                                                                                                                                                                                                                                                                                                                                                                                                                                                                                                                                                                                                                                                                                                                                                                                                                                                                                                                                                                                                                                                                 |                                                              |                                                                                     |                                                                                                                                                     |
| see above                                                                                                                                                                                                                                                                                                                                                                                                                                                                                                                                                                                                                                                                                                                                                                                                                                                                                                                                                                                                                                                                                                                                                                                                                                                                                                                                                                                                                                                                                                                                                                                                                                                                                                                                                                                                                                                                                                                                                                                                                                                                                                                                                                                                                                                                                                                                                                                                                                                                                                                                                                                      | Maryland Public Health Laboratory                            | Maryland Public Health Laboratory                                                   | Maryland Department of Health Laboratories Administration                                                                                           |
| EPI_ISL_682079, EPI_ISL_682080, EPI_ISL_682081, EPI_ISL_682082, EPI_ISL_682083, EPI_ISL_682084, EPI_ISL_682085, EPI_ISL_682086, EPI_ISL_682087, EPI_ISL_682088, EPI_ISL_682089, EPI_ISL_682090, EPI_ISL_682091, EPI_ISL_682092, EPI_ISL_682093, EPI_ISL_682094, EPI_ISL_682095, EPI_ISL_682096, EPI_ISL_682097, EPI_ISL_682098, EPI_ISL_682099, EPI_ISL_682100, EPI_ISL_682101, EPI_ISL_682102, EPI_ISL_682103, EPI_ISL_682104, EPI_ISL_682105, EPI_ISL_682106, EPI_ISL_682107, EPI_ISL_682108, EPI_ISL_682109, EPI_ISL_682110, EPI_ISL_682111, EPI_ISL_682112, EPI_ISL_682113, EPI_ISL_682114, EPI_ISL_682115, EPI_ISL_682116, EPI_ISL_682117, EPI_ISL_682118, EPI_ISL_682119, EPI_ISL_682120, EPI_ISL_682121, EPI_ISL_682122, EPI_ISL_682123, EPI_ISL_682124, EPI_ISL_682125, EPI_ISL_682126, EPI_ISL_682127, EPI_ISL_682128, EPI_ISL_682129, EPI_ISL_682130, EPI_ISL_682131, EPI_ISL_682132, EPI_ISL_682133, EPI_ISL_682134, EPI_ISL_682135, EPI_ISL_682136, EPI_ISL_682137, EPI_ISL_682138, EPI_ISL_682139, EPI_ISL_682140, EPI_ISL_682141, EPI_ISL_682142, EPI_ISL_682143, EPI_ISL_682144, EPI_ISL_682145, EPI_ISL_682146, EPI_ISL_682147, EPI_ISL_682148, EPI_ISL_682149, EPI_ISL_682150, EPI_ISL_682151, EPI_ISL_682152, EPI_ISL_682153, EPI_ISL_682154, EPI_ISL_682155, EPI_ISL_682156, EPI_ISL_682157, EPI_ISL_682158, EPI_ISL_682159, EPI_ISL_682160, EPI_ISL_682161, EPI_ISL_682162, EPI_ISL_682163, EPI_ISL_682164, EPI_ISL_682165, EPI_ISL_682166, EPI_ISL_682167, EPI_ISL_682168, EPI_ISL_682169, EPI_ISL_682170, EPI_ISL_682171, EPI_ISL_682172, EPI_ISL_682173, EPI_ISL_682174, EPI_ISL_682175, EPI_ISL_682176, EPI_ISL_682177, EPI_ISL_682178, EPI_ISL_682179, EPI_ISL_682180, EPI_ISL_682181, EPI_ISL_682182, EPI_ISL_682183, EPI_ISL_682184, EPI_ISL_682185, EPI_ISL_682186, EPI_ISL_682187, EPI_ISL_682188, EPI_ISL_682189, EPI_ISL_682190, EPI_ISL_682191, EPI_ISL_682192, EPI_ISL_682193, EPI_ISL_682194, EPI_ISL_682195, EPI_ISL_682196, EPI_ISL_682197, EPI_ISL_682198, EPI_ISL_682199, EPI_ISL_682200, EPI_ISL_682201, EPI_ISL_682202, EPI_ISL_682203, EPI_ISL_682204, EPI_ISL_682205, EPI_ISL_682206, EPI_ISL_682207, EPI_ISL_682208, EPI_ISL_682209, EPI_ISL_682210, EPI_ISL_682211, EPI_ISL_682212, EPI_ISL_682213, EPI_ISL_682214, EPI_ISL_682215, EPI_ISL_682216, EPI_ISL_682217, EPI_ISL_682218, EPI_ISL_682219, EPI_ISL_682220, EPI_ISL_682221, EPI_ISL_682222, EPI_ISL_682223, EPI_ISL_682224, EPI_ISL_682225, EPI_ISL_682226, EPI_ISL_682227, EPI_ISL_682228, EPI_ISL_682229, EPI_ISL_682230, EPI_ISL_682231, EPI_ISL_682232, EPI_ISL_682233, EPI_ISL_682234 |                                                              |                                                                                     |                                                                                                                                                     |
| see above                                                                                                                                                                                                                                                                                                                                                                                                                                                                                                                                                                                                                                                                                                                                                                                                                                                                                                                                                                                                                                                                                                                                                                                                                                                                                                                                                                                                                                                                                                                                                                                                                                                                                                                                                                                                                                                                                                                                                                                                                                                                                                                                                                                                                                                                                                                                                                                                                                                                                                                                                                                      | University of Michigan Clinical Microbiology Laboratory      | Lauring Lab, University of Michigan, Department of Microbiology and Immunology      | Valesano                                                                                                                                            |
| EPI_ISL_682235                                                                                                                                                                                                                                                                                                                                                                                                                                                                                                                                                                                                                                                                                                                                                                                                                                                                                                                                                                                                                                                                                                                                                                                                                                                                                                                                                                                                                                                                                                                                                                                                                                                                                                                                                                                                                                                                                                                                                                                                                                                                                                                                                                                                                                                                                                                                                                                                                                                                                                                                                                                 | AREA DE SALUD ALAJUELA NORTE - CLINICA DR. MARCIAL RODRIGUEZ | Incienza, Instituto Costarricense de Investigación y Enseñanza en Nutrición y Salud | Francisco Duarte, Hebleen Porras, Claudio Soto-Garita, Estela Cordero, Adriana Godinez & Melany Calderon                                            |
| EPI_ISL_682236                                                                                                                                                                                                                                                                                                                                                                                                                                                                                                                                                                                                                                                                                                                                                                                                                                                                                                                                                                                                                                                                                                                                                                                                                                                                                                                                                                                                                                                                                                                                                                                                                                                                                                                                                                                                                                                                                                                                                                                                                                                                                                                                                                                                                                                                                                                                                                                                                                                                                                                                                                                 | AREA DE SALUD LOS CHILES                                     | Incienza, Instituto Costarricense de Investigación y Enseñanza en Nutrición y Salud | Francisco Duarte, Hebleen Porras, Claudio Soto-Garita, Estela Cordero, Adriana Godinez, Melany Calderon & Mariel López                              |
| EPI_ISL_682237                                                                                                                                                                                                                                                                                                                                                                                                                                                                                                                                                                                                                                                                                                                                                                                                                                                                                                                                                                                                                                                                                                                                                                                                                                                                                                                                                                                                                                                                                                                                                                                                                                                                                                                                                                                                                                                                                                                                                                                                                                                                                                                                                                                                                                                                                                                                                                                                                                                                                                                                                                                 | AREA DE SALUD CORREDORES                                     | Incienza, Instituto Costarricense de Investigación y Enseñanza en Nutrición y Salud | Francisco Duarte, Hebleen Porras, Claudio Soto-Garita, Estela Cordero, Adriana Godinez & Melany Calderon                                            |
| EPI_ISL_682238                                                                                                                                                                                                                                                                                                                                                                                                                                                                                                                                                                                                                                                                                                                                                                                                                                                                                                                                                                                                                                                                                                                                                                                                                                                                                                                                                                                                                                                                                                                                                                                                                                                                                                                                                                                                                                                                                                                                                                                                                                                                                                                                                                                                                                                                                                                                                                                                                                                                                                                                                                                 | AREA DE SALUD LA CRUZ                                        | Incienza, Instituto Costarricense de Investigación y Enseñanza en Nutrición y Salud | Francisco Duarte, Hebleen Porras, Claudio Soto-Garita, Estela Cordero, Adriana Godinez & Melany Calderon                                            |
| EPI_ISL_682239                                                                                                                                                                                                                                                                                                                                                                                                                                                                                                                                                                                                                                                                                                                                                                                                                                                                                                                                                                                                                                                                                                                                                                                                                                                                                                                                                                                                                                                                                                                                                                                                                                                                                                                                                                                                                                                                                                                                                                                                                                                                                                                                                                                                                                                                                                                                                                                                                                                                                                                                                                                 | HOSPITAL CIUDAD NEILY                                        | Incienza, Instituto Costarricense de Investigación y Enseñanza en Nutrición y Salud | Francisco Duarte, Hebleen Porras, Claudio Soto-Garita, Estela Cordero, Adriana Godinez & Melany Calderon                                            |
| EPI_ISL_682240                                                                                                                                                                                                                                                                                                                                                                                                                                                                                                                                                                                                                                                                                                                                                                                                                                                                                                                                                                                                                                                                                                                                                                                                                                                                                                                                                                                                                                                                                                                                                                                                                                                                                                                                                                                                                                                                                                                                                                                                                                                                                                                                                                                                                                                                                                                                                                                                                                                                                                                                                                                 | AREA DE SALUD GOICOCHEA 1                                    | Incienza, Instituto Costarricense de Investigación y Enseñanza en Nutrición y Salud | Francisco Duarte, Hebleen Porras, Claudio Soto-Garita, Estela Cordero, Adriana Godinez & Melany Calderon                                            |
| EPI_ISL_682241                                                                                                                                                                                                                                                                                                                                                                                                                                                                                                                                                                                                                                                                                                                                                                                                                                                                                                                                                                                                                                                                                                                                                                                                                                                                                                                                                                                                                                                                                                                                                                                                                                                                                                                                                                                                                                                                                                                                                                                                                                                                                                                                                                                                                                                                                                                                                                                                                                                                                                                                                                                 | HOSPITAL SAN JUAN DE DIOS                                    | Incienza, Instituto Costarricense de Investigación y Enseñanza en Nutrición y Salud | Francisco Duarte, Hebleen Porras, Claudio Soto-Garita, Estela Cordero, Adriana Godinez & Melany Calderon                                            |
| EPI_ISL_682242                                                                                                                                                                                                                                                                                                                                                                                                                                                                                                                                                                                                                                                                                                                                                                                                                                                                                                                                                                                                                                                                                                                                                                                                                                                                                                                                                                                                                                                                                                                                                                                                                                                                                                                                                                                                                                                                                                                                                                                                                                                                                                                                                                                                                                                                                                                                                                                                                                                                                                                                                                                 | HOSPITAL SAN VICENTE DE PAUL                                 | Incienza, Instituto Costarricense de Investigación y Enseñanza en Nutrición y Salud | Francisco Duarte, Hebleen Porras, Claudio Soto-Garita, Estela Cordero, Adriana Godinez, Melany Calderon & Mariel López                              |
| EPI_ISL_682243                                                                                                                                                                                                                                                                                                                                                                                                                                                                                                                                                                                                                                                                                                                                                                                                                                                                                                                                                                                                                                                                                                                                                                                                                                                                                                                                                                                                                                                                                                                                                                                                                                                                                                                                                                                                                                                                                                                                                                                                                                                                                                                                                                                                                                                                                                                                                                                                                                                                                                                                                                                 | HOSPITAL SAN JUAN DE DIOS                                    | Incienza, Instituto Costarricense de Investigación y Enseñanza en Nutrición y Salud | Francisco Duarte, Hebleen Porras, Claudio Soto-Garita, Estela Cordero, Adriana Godinez & Melany Calderon                                            |
| EPI_ISL_682244                                                                                                                                                                                                                                                                                                                                                                                                                                                                                                                                                                                                                                                                                                                                                                                                                                                                                                                                                                                                                                                                                                                                                                                                                                                                                                                                                                                                                                                                                                                                                                                                                                                                                                                                                                                                                                                                                                                                                                                                                                                                                                                                                                                                                                                                                                                                                                                                                                                                                                                                                                                 | AREA DE SALUD LA CRUZ                                        | Incienza, Instituto Costarricense de Investigación y Enseñanza en Nutrición y Salud | Francisco Duarte, Hebleen Porras, Claudio Soto-Garita, Estela Cordero, Adriana Godinez, Melany Calderon & Mariel López                              |
| EPI_ISL_682245, EPI_ISL_682246                                                                                                                                                                                                                                                                                                                                                                                                                                                                                                                                                                                                                                                                                                                                                                                                                                                                                                                                                                                                                                                                                                                                                                                                                                                                                                                                                                                                                                                                                                                                                                                                                                                                                                                                                                                                                                                                                                                                                                                                                                                                                                                                                                                                                                                                                                                                                                                                                                                                                                                                                                 | HOSPITAL SAN JUAN DE DIOS                                    | Incienza, Instituto Costarricense de Investigación y Enseñanza en Nutrición y Salud | Francisco Duarte, Hebleen Porras, Claudio Soto-Garita, Estela Cordero, Adriana Godinez & Melany Calderon                                            |
| EPI_ISL_682247                                                                                                                                                                                                                                                                                                                                                                                                                                                                                                                                                                                                                                                                                                                                                                                                                                                                                                                                                                                                                                                                                                                                                                                                                                                                                                                                                                                                                                                                                                                                                                                                                                                                                                                                                                                                                                                                                                                                                                                                                                                                                                                                                                                                                                                                                                                                                                                                                                                                                                                                                                                 | AREA DE SALUD CIUDAD QUESADA                                 | Incienza, Instituto Costarricense de Investigación y Enseñanza en Nutrición y Salud | Francisco Duarte, Hebleen Porras, Claudio Soto-Garita, Estela Cordero, Adriana Godinez & Melany Calderon                                            |
| EPI_ISL_682248                                                                                                                                                                                                                                                                                                                                                                                                                                                                                                                                                                                                                                                                                                                                                                                                                                                                                                                                                                                                                                                                                                                                                                                                                                                                                                                                                                                                                                                                                                                                                                                                                                                                                                                                                                                                                                                                                                                                                                                                                                                                                                                                                                                                                                                                                                                                                                                                                                                                                                                                                                                 | AREA DE SALUD CIUDAD QUESADA                                 | Incienza, Instituto Costarricense de Investigación y Enseñanza en Nutrición y Salud | Francisco Duarte, Hebleen Porras, Claudio Soto-Garita, Estela Cordero, Adriana Godinez, Melany Calderon & Mariel López                              |
| EPI_ISL_682249                                                                                                                                                                                                                                                                                                                                                                                                                                                                                                                                                                                                                                                                                                                                                                                                                                                                                                                                                                                                                                                                                                                                                                                                                                                                                                                                                                                                                                                                                                                                                                                                                                                                                                                                                                                                                                                                                                                                                                                                                                                                                                                                                                                                                                                                                                                                                                                                                                                                                                                                                                                 | AREA DE SALUD LA UNION                                       | Incienza, Instituto Costarricense de Investigación y Enseñanza en Nutrición y Salud | Francisco Duarte, Hebleen Porras, Claudio Soto-Garita, Estela Cordero, Adriana Godinez, Melany Calderon & Mariel López                              |
| EPI_ISL_682250, EPI_ISL_682251, EPI_ISL_682252                                                                                                                                                                                                                                                                                                                                                                                                                                                                                                                                                                                                                                                                                                                                                                                                                                                                                                                                                                                                                                                                                                                                                                                                                                                                                                                                                                                                                                                                                                                                                                                                                                                                                                                                                                                                                                                                                                                                                                                                                                                                                                                                                                                                                                                                                                                                                                                                                                                                                                                                                 | AREA DE SALUD ESCAZU (COOPESANA)                             | Incienza, Instituto Costarricense de Investigación y Enseñanza en Nutrición y Salud | Francisco Duarte, Hebleen Porras, Claudio Soto-Garita, Estela Cordero, Adriana Godinez & Melany Calderon                                            |
| EPI_ISL_682253, EPI_ISL_682254                                                                                                                                                                                                                                                                                                                                                                                                                                                                                                                                                                                                                                                                                                                                                                                                                                                                                                                                                                                                                                                                                                                                                                                                                                                                                                                                                                                                                                                                                                                                                                                                                                                                                                                                                                                                                                                                                                                                                                                                                                                                                                                                                                                                                                                                                                                                                                                                                                                                                                                                                                 | HOSPITAL SAN JUAN DE DIOS                                    | Incienza, Instituto Costarricense de Investigación y Enseñanza en Nutrición y Salud | Francisco Duarte, Hebleen Porras, Claudio Soto-Garita, Estela Cordero, Adriana Godinez & Melany Calderon                                            |
| EPI_ISL_682255                                                                                                                                                                                                                                                                                                                                                                                                                                                                                                                                                                                                                                                                                                                                                                                                                                                                                                                                                                                                                                                                                                                                                                                                                                                                                                                                                                                                                                                                                                                                                                                                                                                                                                                                                                                                                                                                                                                                                                                                                                                                                                                                                                                                                                                                                                                                                                                                                                                                                                                                                                                 | HOSPITAL SAN VICENTE DE PAUL                                 | Incienza, Instituto Costarricense de Investigación y Enseñanza en Nutrición y Salud | Francisco Duarte, Hebleen Porras, Claudio Soto-Garita, Estela Cordero, Adriana Godinez & Melany Calderon                                            |
| EPI_ISL_682256                                                                                                                                                                                                                                                                                                                                                                                                                                                                                                                                                                                                                                                                                                                                                                                                                                                                                                                                                                                                                                                                                                                                                                                                                                                                                                                                                                                                                                                                                                                                                                                                                                                                                                                                                                                                                                                                                                                                                                                                                                                                                                                                                                                                                                                                                                                                                                                                                                                                                                                                                                                 | AREA DE SALUD CORREDORES                                     | Incienza, Instituto Costarricense de Investigación y Enseñanza en Nutrición y Salud | Francisco Duarte, Hebleen Porras, Claudio Soto-Garita, Estela Cordero, Adriana Godinez, Melany Calderon & Mariel López                              |
| EPI_ISL_682257                                                                                                                                                                                                                                                                                                                                                                                                                                                                                                                                                                                                                                                                                                                                                                                                                                                                                                                                                                                                                                                                                                                                                                                                                                                                                                                                                                                                                                                                                                                                                                                                                                                                                                                                                                                                                                                                                                                                                                                                                                                                                                                                                                                                                                                                                                                                                                                                                                                                                                                                                                                 | HOSPITAL SAN JUAN DE DIOS                                    | Incienza, Instituto Costarricense de Investigación y Enseñanza en Nutrición y Salud | Francisco Duarte, Hebleen Porras, Claudio Soto-Garita, Estela Cordero, Adriana Godinez & Melany Calderon                                            |
| EPI_ISL_682258                                                                                                                                                                                                                                                                                                                                                                                                                                                                                                                                                                                                                                                                                                                                                                                                                                                                                                                                                                                                                                                                                                                                                                                                                                                                                                                                                                                                                                                                                                                                                                                                                                                                                                                                                                                                                                                                                                                                                                                                                                                                                                                                                                                                                                                                                                                                                                                                                                                                                                                                                                                 | AREA DE SALUD ALAJUELA NORTE - CLINICA DR. MARCIAL RODRIGUEZ | Incienza, Instituto Costarricense de Investigación y Enseñanza en Nutrición y Salud | Francisco Duarte, Hebleen Porras, Claudio Soto-Garita, Estela Cordero, Adriana Godinez & Melany Calderon                                            |
| EPI_ISL_682259                                                                                                                                                                                                                                                                                                                                                                                                                                                                                                                                                                                                                                                                                                                                                                                                                                                                                                                                                                                                                                                                                                                                                                                                                                                                                                                                                                                                                                                                                                                                                                                                                                                                                                                                                                                                                                                                                                                                                                                                                                                                                                                                                                                                                                                                                                                                                                                                                                                                                                                                                                                 | AREA DE SALUD ALAJUELA NORTE - CLINICA DR. MARCIAL RODRIGUEZ | Incienza, Instituto Costarricense de Investigación y Enseñanza en Nutrición y Salud | Francisco Duarte, Hebleen Porras, Claudio Soto-Garita, Estela Cordero, Adriana Godinez, Melany Calderon & Mariel López                              |
| EPI_ISL_682260                                                                                                                                                                                                                                                                                                                                                                                                                                                                                                                                                                                                                                                                                                                                                                                                                                                                                                                                                                                                                                                                                                                                                                                                                                                                                                                                                                                                                                                                                                                                                                                                                                                                                                                                                                                                                                                                                                                                                                                                                                                                                                                                                                                                                                                                                                                                                                                                                                                                                                                                                                                 | AREA DE SALUD CATEDRAL NORESTE                               | Incienza, Instituto Costarricense de Investigación y Enseñanza en Nutrición y Salud | Francisco Duarte, Hebleen Porras, Claudio Soto-Garita, Estela Cordero, Adriana Godinez, Melany Calderon & Mariel López                              |
| EPI_ISL_682261                                                                                                                                                                                                                                                                                                                                                                                                                                                                                                                                                                                                                                                                                                                                                                                                                                                                                                                                                                                                                                                                                                                                                                                                                                                                                                                                                                                                                                                                                                                                                                                                                                                                                                                                                                                                                                                                                                                                                                                                                                                                                                                                                                                                                                                                                                                                                                                                                                                                                                                                                                                 | TAMIZAJE COMUNITARIO- PASO CANOAS                            | Incienza, Instituto Costarricense de Investigación y Enseñanza en Nutrición y Salud | Francisco Duarte, Hebleen Porras, Claudio Soto-Garita, Estela Cordero, Adriana Godinez & Melany Calderon                                            |
| EPI_ISL_682262, EPI_ISL_682263, EPI_ISL_682264                                                                                                                                                                                                                                                                                                                                                                                                                                                                                                                                                                                                                                                                                                                                                                                                                                                                                                                                                                                                                                                                                                                                                                                                                                                                                                                                                                                                                                                                                                                                                                                                                                                                                                                                                                                                                                                                                                                                                                                                                                                                                                                                                                                                                                                                                                                                                                                                                                                                                                                                                 | HOSPITAL SAN JUAN DE DIOS                                    | Incienza, Instituto Costarricense de Investigación y Enseñanza en Nutrición y Salud | Francisco Duarte, Hebleen Porras, Claudio Soto-Garita, Estela Cordero, Adriana Godinez & Melany Calderon                                            |
| EPI_ISL_682265                                                                                                                                                                                                                                                                                                                                                                                                                                                                                                                                                                                                                                                                                                                                                                                                                                                                                                                                                                                                                                                                                                                                                                                                                                                                                                                                                                                                                                                                                                                                                                                                                                                                                                                                                                                                                                                                                                                                                                                                                                                                                                                                                                                                                                                                                                                                                                                                                                                                                                                                                                                 | HOSPITAL UPALA                                               | Incienza, Instituto Costarricense de Investigación y Enseñanza en Nutrición y Salud | Francisco Duarte, Hebleen Porras, Claudio Soto-Garita, Estela Cordero, Adriana Godinez & Melany Calderon                                            |
| EPI_ISL_682266, EPI_ISL_682267, EPI_ISL_682268, EPI_ISL_682269, EPI_ISL_682270, EPI_ISL_682271, EPI_ISL_682272, EPI_ISL_682273, EPI_ISL_682274                                                                                                                                                                                                                                                                                                                                                                                                                                                                                                                                                                                                                                                                                                                                                                                                                                                                                                                                                                                                                                                                                                                                                                                                                                                                                                                                                                                                                                                                                                                                                                                                                                                                                                                                                                                                                                                                                                                                                                                                                                                                                                                                                                                                                                                                                                                                                                                                                                                 | HOSPITAL SAN JUAN DE DIOS                                    | Incienza, Instituto Costarricense de Investigación y Enseñanza en Nutrición y Salud | Francisco Duarte, Hebleen Porras, Claudio Soto-Garita, Estela Cordero, Adriana Godinez & Melany Calderon                                            |
| EPI_ISL_682275, EPI_ISL_682276, EPI_ISL_682277                                                                                                                                                                                                                                                                                                                                                                                                                                                                                                                                                                                                                                                                                                                                                                                                                                                                                                                                                                                                                                                                                                                                                                                                                                                                                                                                                                                                                                                                                                                                                                                                                                                                                                                                                                                                                                                                                                                                                                                                                                                                                                                                                                                                                                                                                                                                                                                                                                                                                                                                                 | LABORATORIOS LABIN                                           | Incienza, Instituto Costarricense de Investigación y Enseñanza en Nutrición y Salud | Francisco Duarte, Hebleen Porras, Claudio Soto-Garita, Estela Cordero, Adriana Godinez, Melany Calderon & Pei Ling Chan                             |
| EPI_ISL_682278, EPI_ISL_682279,                                                                                                                                                                                                                                                                                                                                                                                                                                                                                                                                                                                                                                                                                                                                                                                                                                                                                                                                                                                                                                                                                                                                                                                                                                                                                                                                                                                                                                                                                                                                                                                                                                                                                                                                                                                                                                                                                                                                                                                                                                                                                                                                                                                                                                                                                                                                                                                                                                                                                                                                                                | Middlemore Hospital                                          | Institute of Environmental Science and Research (ESR)                               | Xiaoyun Ren, Matt Storey, Nikki Freed, Muhammad Faisal, Jing Wang, Hermes Perez, Anja Werno, Antje van der Linden, Arlo Upton, Chris Mansell, David |



|                                                                                                                                                                                                                                                                                                                                                                                                                                                                                                                                                                                                                                                                                                                                                                                                                                                                                                                                                                |                                                                                                                                                                                            |                                                          |                                                                                                                                                         |
|----------------------------------------------------------------------------------------------------------------------------------------------------------------------------------------------------------------------------------------------------------------------------------------------------------------------------------------------------------------------------------------------------------------------------------------------------------------------------------------------------------------------------------------------------------------------------------------------------------------------------------------------------------------------------------------------------------------------------------------------------------------------------------------------------------------------------------------------------------------------------------------------------------------------------------------------------------------|--------------------------------------------------------------------------------------------------------------------------------------------------------------------------------------------|----------------------------------------------------------|---------------------------------------------------------------------------------------------------------------------------------------------------------|
| see above                                                                                                                                                                                                                                                                                                                                                                                                                                                                                                                                                                                                                                                                                                                                                                                                                                                                                                                                                      | Respiratory Virus Unit, Microbiology Services Colindale,<br>Public Health England                                                                                                          | COVID-19 Genomics UK (COG-UK) Consortium                 | PHE Covid Sequencing Team                                                                                                                               |
| EPI_ISL_683597                                                                                                                                                                                                                                                                                                                                                                                                                                                                                                                                                                                                                                                                                                                                                                                                                                                                                                                                                 | Hospital Clínico Universitario Lozano Blesa de Zaragoza<br>(España)                                                                                                                        | SeqCOVID-SPAIN consortium/IBV(CSIC)                      | Rafael Benito, Sonia Algarate, Jessica Bueno and SeqCOVID-SPAIN consortium                                                                              |
| EPI_ISL_683598, EPI_ISL_683599, EPI_ISL_683600, EPI_ISL_683601, EPI_ISL_683602, EPI_ISL_683603, EPI_ISL_683604, EPI_ISL_683605, EPI_ISL_683606, EPI_ISL_683607, EPI_ISL_683608, EPI_ISL_683609, EPI_ISL_683610, EPI_ISL_683611, EPI_ISL_683612, EPI_ISL_683613, EPI_ISL_683614, EPI_ISL_683615, EPI_ISL_683616, EPI_ISL_683617, EPI_ISL_683618, EPI_ISL_683619, EPI_ISL_683620, EPI_ISL_683621, EPI_ISL_683622, EPI_ISL_683623, EPI_ISL_683624, EPI_ISL_683625, EPI_ISL_683626, EPI_ISL_683627, EPI_ISL_683628, EPI_ISL_683629, EPI_ISL_683630, EPI_ISL_683631, EPI_ISL_683632, EPI_ISL_683633, EPI_ISL_683634, EPI_ISL_683635, EPI_ISL_683636, EPI_ISL_683637, EPI_ISL_683638, EPI_ISL_683639, EPI_ISL_683640, EPI_ISL_683641, EPI_ISL_683642, EPI_ISL_683643, EPI_ISL_683644, EPI_ISL_683645, EPI_ISL_683646, EPI_ISL_683647, EPI_ISL_683648, EPI_ISL_683649, EPI_ISL_683650, EPI_ISL_683651, EPI_ISL_683652, EPI_ISL_683653, EPI_ISL_683654, EPI_ISL_683655 |                                                                                                                                                                                            |                                                          |                                                                                                                                                         |
| see above                                                                                                                                                                                                                                                                                                                                                                                                                                                                                                                                                                                                                                                                                                                                                                                                                                                                                                                                                      | Servicio de Microbiología, Laboratori Clínic Metropolitana Nord. Hospital Universitari Germans Trias i Pujol. Institut d'Investigació en Ciències de la Salut Germans Trias i Pujol (IGTP) | SeqCOVID-SPAIN consortium/IBV(CSIC)                      | Elisa Martró, Antoni E. Bordoy, Anna Not, Adrián Antuori, Anabel Fernández, Nona Romani, Verónica Saludes, Cristina Casañ and SeqCOVID-SPAIN consortium |
| EPI_ISL_683689                                                                                                                                                                                                                                                                                                                                                                                                                                                                                                                                                                                                                                                                                                                                                                                                                                                                                                                                                 | Hennepin County Medical Center                                                                                                                                                             | Minnesota Department of Health, Public Health Laboratory | Alexandra Lorentz, Jacob Garfin, Matt Plumb, and Xiong Wang                                                                                             |
| EPI_ISL_683690, EPI_ISL_683691, EPI_ISL_683692, EPI_ISL_683693, EPI_ISL_683694                                                                                                                                                                                                                                                                                                                                                                                                                                                                                                                                                                                                                                                                                                                                                                                                                                                                                 | Essentia Health-St. Mary's Medical Center                                                                                                                                                  | Minnesota Department of Health, Public Health Laboratory | Alexandra Lorentz, Jacob Garfin, Matt Plumb, and Xiong Wang                                                                                             |
| EPI_ISL_683695                                                                                                                                                                                                                                                                                                                                                                                                                                                                                                                                                                                                                                                                                                                                                                                                                                                                                                                                                 | Mayo Clinic & Mayo Clinic Laboratories                                                                                                                                                     | Minnesota Department of Health, Public Health Laboratory | Alexandra Lorentz, Jacob Garfin, Matt Plumb, and Xiong Wang                                                                                             |
| EPI_ISL_683696, EPI_ISL_683697, EPI_ISL_683698, EPI_ISL_683699, EPI_ISL_683700, EPI_ISL_683701, EPI_ISL_683702, EPI_ISL_683703, EPI_ISL_683704, EPI_ISL_683705, EPI_ISL_683706, EPI_ISL_683707, EPI_ISL_683708, EPI_ISL_683709, EPI_ISL_683710, EPI_ISL_683711, EPI_ISL_683712, EPI_ISL_683713                                                                                                                                                                                                                                                                                                                                                                                                                                                                                                                                                                                                                                                                 | see above                                                                                                                                                                                  | Essentia Health-St. Mary's Medical Center                | Minnesota Department of Health, Public Health Laboratory                                                                                                |
| EPI_ISL_683714, EPI_ISL_683715, EPI_ISL_683716, EPI_ISL_683717, EPI_ISL_683718, EPI_ISL_683719, EPI_ISL_683720, EPI_ISL_683721, EPI_ISL_683722, EPI_ISL_683723, EPI_ISL_683724, EPI_ISL_683725, EPI_ISL_683726, EPI_ISL_683727, EPI_ISL_683728                                                                                                                                                                                                                                                                                                                                                                                                                                                                                                                                                                                                                                                                                                                 | see above                                                                                                                                                                                  | Mayo Clinic & Mayo Clinic Laboratories                   | Minnesota Department of Health, Public Health Laboratory                                                                                                |
| EPI_ISL_683729, EPI_ISL_683730, EPI_ISL_683731, EPI_ISL_683732, EPI_ISL_683733, EPI_ISL_683734, EPI_ISL_683735, EPI_ISL_683736, EPI_ISL_683737, EPI_ISL_683738, EPI_ISL_683739, EPI_ISL_683740, EPI_ISL_683741, EPI_ISL_683742, EPI_ISL_683743, EPI_ISL_683744, EPI_ISL_683745, EPI_ISL_683746, EPI_ISL_683747, EPI_ISL_683748, EPI_ISL_683749, EPI_ISL_683750                                                                                                                                                                                                                                                                                                                                                                                                                                                                                                                                                                                                 | see above                                                                                                                                                                                  | Minnesota Department of Health, Public Health Laboratory | Minnesota Department of Health, Public Health Laboratory                                                                                                |
| EPI_ISL_683753                                                                                                                                                                                                                                                                                                                                                                                                                                                                                                                                                                                                                                                                                                                                                                                                                                                                                                                                                 | DOHMH Corona                                                                                                                                                                               | New York City Public Health Laboratory                   | Jade Wang, et al.                                                                                                                                       |
| EPI_ISL_683754                                                                                                                                                                                                                                                                                                                                                                                                                                                                                                                                                                                                                                                                                                                                                                                                                                                                                                                                                 | DOHMH Morrisania                                                                                                                                                                           | New York City Public Health Laboratory                   | Jade Wang, et al.                                                                                                                                       |
| EPI_ISL_683755                                                                                                                                                                                                                                                                                                                                                                                                                                                                                                                                                                                                                                                                                                                                                                                                                                                                                                                                                 | DOHMH PHL                                                                                                                                                                                  | New York City Public Health Laboratory                   | Jade Wang, et al.                                                                                                                                       |
| EPI_ISL_683756                                                                                                                                                                                                                                                                                                                                                                                                                                                                                                                                                                                                                                                                                                                                                                                                                                                                                                                                                 | DOHMH Central Harlem                                                                                                                                                                       | New York City Public Health Laboratory                   | Jade Wang, et al.                                                                                                                                       |
| EPI_ISL_683757, EPI_ISL_683758                                                                                                                                                                                                                                                                                                                                                                                                                                                                                                                                                                                                                                                                                                                                                                                                                                                                                                                                 | DOHMH Corona                                                                                                                                                                               | New York City Public Health Laboratory                   | Jade Wang, et al.                                                                                                                                       |
| EPI_ISL_683759                                                                                                                                                                                                                                                                                                                                                                                                                                                                                                                                                                                                                                                                                                                                                                                                                                                                                                                                                 | DOHMH PHL                                                                                                                                                                                  | New York City Public Health Laboratory                   | Jade Wang, et al.                                                                                                                                       |
| EPI_ISL_683760                                                                                                                                                                                                                                                                                                                                                                                                                                                                                                                                                                                                                                                                                                                                                                                                                                                                                                                                                 | DOHMH Morrisania                                                                                                                                                                           | New York City Public Health Laboratory                   | Jade Wang, et al.                                                                                                                                       |
| EPI_ISL_683761                                                                                                                                                                                                                                                                                                                                                                                                                                                                                                                                                                                                                                                                                                                                                                                                                                                                                                                                                 | DOHMH Corona                                                                                                                                                                               | New York City Public Health Laboratory                   | Jade Wang, et al.                                                                                                                                       |
| EPI_ISL_683762, EPI_ISL_683763                                                                                                                                                                                                                                                                                                                                                                                                                                                                                                                                                                                                                                                                                                                                                                                                                                                                                                                                 | DOHMH Morrisania                                                                                                                                                                           | New York City Public Health Laboratory                   | Jade Wang, et al.                                                                                                                                       |
| EPI_ISL_683764                                                                                                                                                                                                                                                                                                                                                                                                                                                                                                                                                                                                                                                                                                                                                                                                                                                                                                                                                 | DOHMH Corona                                                                                                                                                                               | New York City Public Health Laboratory                   | Jade Wang, et al.                                                                                                                                       |
| EPI_ISL_683765                                                                                                                                                                                                                                                                                                                                                                                                                                                                                                                                                                                                                                                                                                                                                                                                                                                                                                                                                 | DOHMH Chelsea                                                                                                                                                                              | New York City Public Health Laboratory                   | Jade Wang, et al.                                                                                                                                       |
| EPI_ISL_683766                                                                                                                                                                                                                                                                                                                                                                                                                                                                                                                                                                                                                                                                                                                                                                                                                                                                                                                                                 | DOHMH Corona                                                                                                                                                                               | New York City Public Health Laboratory                   | Jade Wang, et al.                                                                                                                                       |
| EPI_ISL_683767, EPI_ISL_683768, EPI_ISL_683769                                                                                                                                                                                                                                                                                                                                                                                                                                                                                                                                                                                                                                                                                                                                                                                                                                                                                                                 | DOHMH Riverside                                                                                                                                                                            | New York City Public Health Laboratory                   | Jade Wang, et al.                                                                                                                                       |
| EPI_ISL_683770                                                                                                                                                                                                                                                                                                                                                                                                                                                                                                                                                                                                                                                                                                                                                                                                                                                                                                                                                 | DOHMH Corona                                                                                                                                                                               | New York City Public Health Laboratory                   | Jade Wang, et al.                                                                                                                                       |
| EPI_ISL_683771                                                                                                                                                                                                                                                                                                                                                                                                                                                                                                                                                                                                                                                                                                                                                                                                                                                                                                                                                 | DOHMH Fort Greene                                                                                                                                                                          | New York City Public Health Laboratory                   | Jade Wang, et al.                                                                                                                                       |
| EPI_ISL_683772                                                                                                                                                                                                                                                                                                                                                                                                                                                                                                                                                                                                                                                                                                                                                                                                                                                                                                                                                 | DOHMH Morrisania                                                                                                                                                                           | New York City Public Health Laboratory                   | Jade Wang, et al.                                                                                                                                       |
| EPI_ISL_683773                                                                                                                                                                                                                                                                                                                                                                                                                                                                                                                                                                                                                                                                                                                                                                                                                                                                                                                                                 | DOHMH Corona                                                                                                                                                                               | New York City Public Health Laboratory                   | Jade Wang, et al.                                                                                                                                       |
| EPI_ISL_683774                                                                                                                                                                                                                                                                                                                                                                                                                                                                                                                                                                                                                                                                                                                                                                                                                                                                                                                                                 | DOHMH PHL                                                                                                                                                                                  | New York City Public Health Laboratory                   | Jade Wang, et al.                                                                                                                                       |
| EPI_ISL_683775, EPI_ISL_683776                                                                                                                                                                                                                                                                                                                                                                                                                                                                                                                                                                                                                                                                                                                                                                                                                                                                                                                                 | DOHMH Jamaica                                                                                                                                                                              | New York City Public Health Laboratory                   | Jade Wang, et al.                                                                                                                                       |
| EPI_ISL_683777                                                                                                                                                                                                                                                                                                                                                                                                                                                                                                                                                                                                                                                                                                                                                                                                                                                                                                                                                 | DOHMH Corona                                                                                                                                                                               | New York City Public Health Laboratory                   | Jade Wang, et al.                                                                                                                                       |
| EPI_ISL_683778                                                                                                                                                                                                                                                                                                                                                                                                                                                                                                                                                                                                                                                                                                                                                                                                                                                                                                                                                 | DOHMH Morrisania                                                                                                                                                                           | New York City Public Health Laboratory                   | Jade Wang, et al.                                                                                                                                       |
| EPI_ISL_683779                                                                                                                                                                                                                                                                                                                                                                                                                                                                                                                                                                                                                                                                                                                                                                                                                                                                                                                                                 | DOHMH Corona                                                                                                                                                                               | New York City Public Health Laboratory                   | Jade Wang, et al.                                                                                                                                       |
| EPI_ISL_683780                                                                                                                                                                                                                                                                                                                                                                                                                                                                                                                                                                                                                                                                                                                                                                                                                                                                                                                                                 | DOHMH Chelsea                                                                                                                                                                              | New York City Public Health Laboratory                   | Jade Wang, et al.                                                                                                                                       |
| EPI_ISL_683781, EPI_ISL_683782                                                                                                                                                                                                                                                                                                                                                                                                                                                                                                                                                                                                                                                                                                                                                                                                                                                                                                                                 | DOHMH Jamaica                                                                                                                                                                              | New York City Public Health Laboratory                   | Jade Wang, et al.                                                                                                                                       |
| EPI_ISL_683783                                                                                                                                                                                                                                                                                                                                                                                                                                                                                                                                                                                                                                                                                                                                                                                                                                                                                                                                                 | DOHMH PHL                                                                                                                                                                                  | New York City Public Health Laboratory                   | Jade Wang, et al.                                                                                                                                       |
| EPI_ISL_683784                                                                                                                                                                                                                                                                                                                                                                                                                                                                                                                                                                                                                                                                                                                                                                                                                                                                                                                                                 | DOHMH Riverside                                                                                                                                                                            | New York City Public Health Laboratory                   | Jade Wang, et al.                                                                                                                                       |
| EPI_ISL_683785                                                                                                                                                                                                                                                                                                                                                                                                                                                                                                                                                                                                                                                                                                                                                                                                                                                                                                                                                 | DOHMH Corona                                                                                                                                                                               | New York City Public Health Laboratory                   | Jade Wang, et al.                                                                                                                                       |
| EPI_ISL_683786                                                                                                                                                                                                                                                                                                                                                                                                                                                                                                                                                                                                                                                                                                                                                                                                                                                                                                                                                 | DOHMH Jamaica                                                                                                                                                                              | New York City Public Health Laboratory                   | Jade Wang, et al.                                                                                                                                       |
| EPI_ISL_683787                                                                                                                                                                                                                                                                                                                                                                                                                                                                                                                                                                                                                                                                                                                                                                                                                                                                                                                                                 | DOHMH PHL                                                                                                                                                                                  | New York City Public Health Laboratory                   | Jade Wang, et al.                                                                                                                                       |
| EPI_ISL_683788                                                                                                                                                                                                                                                                                                                                                                                                                                                                                                                                                                                                                                                                                                                                                                                                                                                                                                                                                 | DOHMH Chelsea                                                                                                                                                                              | New York City Public Health Laboratory                   | Jade Wang, et al.                                                                                                                                       |
| EPI_ISL_683789                                                                                                                                                                                                                                                                                                                                                                                                                                                                                                                                                                                                                                                                                                                                                                                                                                                                                                                                                 | DOHMH PHL                                                                                                                                                                                  | New York City Public Health Laboratory                   | Jade Wang, et al.                                                                                                                                       |
| EPI_ISL_683790                                                                                                                                                                                                                                                                                                                                                                                                                                                                                                                                                                                                                                                                                                                                                                                                                                                                                                                                                 | DOHMH Morrisania                                                                                                                                                                           | New York City Public Health Laboratory                   | Jade Wang, et al.                                                                                                                                       |
| EPI_ISL_683791                                                                                                                                                                                                                                                                                                                                                                                                                                                                                                                                                                                                                                                                                                                                                                                                                                                                                                                                                 | DOHMH Jamaica                                                                                                                                                                              | New York City Public Health Laboratory                   | Jade Wang, et al.                                                                                                                                       |
| EPI_ISL_683792                                                                                                                                                                                                                                                                                                                                                                                                                                                                                                                                                                                                                                                                                                                                                                                                                                                                                                                                                 | DOHMH Chelsea                                                                                                                                                                              | New York City Public Health Laboratory                   | Jade Wang, et al.                                                                                                                                       |
| EPI_ISL_683793, EPI_ISL_683794                                                                                                                                                                                                                                                                                                                                                                                                                                                                                                                                                                                                                                                                                                                                                                                                                                                                                                                                 | DOHMH Corona                                                                                                                                                                               | New York City Public Health Laboratory                   | Jade Wang, et al.                                                                                                                                       |
| EPI_ISL_683795                                                                                                                                                                                                                                                                                                                                                                                                                                                                                                                                                                                                                                                                                                                                                                                                                                                                                                                                                 | DOHMH Central Harlem                                                                                                                                                                       | New York City Public Health Laboratory                   | Jade Wang, et al.                                                                                                                                       |
| EPI_ISL_683796                                                                                                                                                                                                                                                                                                                                                                                                                                                                                                                                                                                                                                                                                                                                                                                                                                                                                                                                                 | DOHMH Corona                                                                                                                                                                               | New York City Public Health Laboratory                   | Jade Wang, et al.                                                                                                                                       |
| EPI_ISL_683797                                                                                                                                                                                                                                                                                                                                                                                                                                                                                                                                                                                                                                                                                                                                                                                                                                                                                                                                                 | DOHMH PHL                                                                                                                                                                                  | New York City Public Health Laboratory                   | Jade Wang, et al.                                                                                                                                       |

|                                                                |                      |                                                      |                                |
|----------------------------------------------------------------|----------------------|------------------------------------------------------|--------------------------------|
| EPI_ISL_683798, EPI_ISL_683799, EPI_ISL_683800                 | DOHMH Corona         | New York City Public Health Laboratory               | Jade Wang, et al.              |
| EPI_ISL_683801                                                 | DOHMH Morrisania     | New York City Public Health Laboratory               | Jade Wang, et al.              |
| EPI_ISL_683802                                                 | DOHMH Corona         | New York City Public Health Laboratory               | Jade Wang, et al.              |
| EPI_ISL_683803, EPI_ISL_683804, EPI_ISL_683805, EPI_ISL_683806 | DOHMH Morrisania     | New York City Public Health Laboratory               | Jade Wang, et al.              |
| EPI_ISL_683807, EPI_ISL_683808                                 | DOHMH Chelsea        | New York City Public Health Laboratory               | Jade Wang, et al.              |
| EPI_ISL_683809                                                 | DOHMH Corona         | New York City Public Health Laboratory               | Jade Wang, et al.              |
| EPI_ISL_683810                                                 | DOHMH PHL            | New York City Public Health Laboratory               | Jade Wang, et al.              |
| EPI_ISL_683811, EPI_ISL_683812                                 | DOHMH Corona         | New York City Public Health Laboratory               | Jade Wang, et al.              |
| EPI_ISL_683813                                                 | DOHMH Central Harlem | New York City Public Health Laboratory               | Jade Wang, et al.              |
| EPI_ISL_683814                                                 | DOHMH Morrisania     | New York City Public Health Laboratory               | Jade Wang, et al.              |
| EPI_ISL_683815                                                 | DOHMH Corona         | New York City Public Health Laboratory               | Jade Wang, et al.              |
| EPI_ISL_683816                                                 | DOHMH Fort Greene    | New York City Public Health Laboratory               | Jade Wang, et al.              |
| EPI_ISL_683817, EPI_ISL_683818                                 | DOHMH Corona         | New York City Public Health Laboratory               | Jade Wang, et al.              |
| EPI_ISL_683819, EPI_ISL_683820                                 | DOHMH Riverside      | New York City Public Health Laboratory               | Jade Wang, et al.              |
| EPI_ISL_683821                                                 | DOHMH Crown Heights  | New York City Public Health Laboratory               | Jade Wang, et al.              |
| EPI_ISL_683822                                                 | DOHMH Jamaica        | New York City Public Health Laboratory               | Jade Wang, et al.              |
| EPI_ISL_683823                                                 | DOHMH Morrisania     | New York City Public Health Laboratory               | Jade Wang, et al.              |
| EPI_ISL_683824                                                 | DOHMH Corona         | New York City Public Health Laboratory               | Jade Wang, et al.              |
| EPI_ISL_683825, EPI_ISL_683826                                 | DOHMH Morrisania     | New York City Public Health Laboratory               | Jade Wang, et al.              |
| EPI_ISL_683827                                                 | DOHMH Crown Heights  | New York City Public Health Laboratory               | Jade Wang, et al.              |
| EPI_ISL_683828                                                 | DOHMH Chelsea        | New York City Public Health Laboratory               | Jade Wang, et al.              |
| EPI_ISL_683829                                                 | DOHMH Central Harlem | New York City Public Health Laboratory               | Jade Wang, et al.              |
| EPI_ISL_683830                                                 | DOHMH Chelsea        | New York City Public Health Laboratory               | Jade Wang, et al.              |
| EPI_ISL_683831                                                 | DOHMH Corona         | New York City Public Health Laboratory               | Jade Wang, et al.              |
| EPI_ISL_683832                                                 | DOHMH Fort Greene    | New York City Public Health Laboratory               | Jade Wang, et al.              |
| EPI_ISL_683833                                                 | DOHMH Corona         | New York City Public Health Laboratory               | Jade Wang, et al.              |
| EPI_ISL_683834                                                 | DOHMH Central Harlem | New York City Public Health Laboratory               | Jade Wang, et al.              |
| EPI_ISL_683835                                                 | CICM                 | Malaria Research and Training Center (MRTC-Parasito) | Antoine Dara, Abdoulaye Djimde |
| EPI_ISL_683836                                                 | DOHMH PHL            | New York City Public Health Laboratory               | Jade Wang, et al.              |
| EPI_ISL_683837, EPI_ISL_683838                                 | DOHMH Jamaica        | New York City Public Health Laboratory               | Jade Wang, et al.              |
| EPI_ISL_683839, EPI_ISL_683840                                 | DOHMH Morrisania     | New York City Public Health Laboratory               | Jade Wang, et al.              |
| EPI_ISL_683841                                                 | DOHMH Corona         | New York City Public Health Laboratory               | Jade Wang, et al.              |
| EPI_ISL_683842                                                 | DOHMH Central Harlem | New York City Public Health Laboratory               | Jade Wang, et al.              |
| EPI_ISL_683843, EPI_ISL_683844, EPI_ISL_683845                 | DOHMH Morrisania     | New York City Public Health Laboratory               | Jade Wang, et al.              |
| EPI_ISL_683846                                                 | DOHMH PHL            | New York City Public Health Laboratory               | Jade Wang, et al.              |
| EPI_ISL_683847                                                 | DOHMH Corona         | New York City Public Health Laboratory               | Jade Wang, et al.              |
| EPI_ISL_683848                                                 | DOHMH Central Harlem | New York City Public Health Laboratory               | Jade Wang, et al.              |
| EPI_ISL_683849                                                 | DOHMH Corona         | New York City Public Health Laboratory               | Jade Wang, et al.              |
| EPI_ISL_683850                                                 | DOHMH Jamaica        | New York City Public Health Laboratory               | Jade Wang, et al.              |
| EPI_ISL_683851                                                 | DOHMH Corona         | New York City Public Health Laboratory               | Jade Wang, et al.              |
| EPI_ISL_683852                                                 | DOHMH PHL            | New York City Public Health Laboratory               | Jade Wang, et al.              |
| EPI_ISL_683853, EPI_ISL_683854                                 | DOHMH Morrisania     | New York City Public Health Laboratory               | Jade Wang, et al.              |
| EPI_ISL_683855                                                 | DOHMH Corona         | New York City Public Health Laboratory               | Jade Wang, et al.              |
| EPI_ISL_683856                                                 | DOHMH Crown Heights  | New York City Public Health Laboratory               | Jade Wang, et al.              |
| EPI_ISL_683857                                                 | DOHMH Corona         | New York City Public Health Laboratory               | Jade Wang, et al.              |
| EPI_ISL_683858                                                 | DOHMH Jamaica        | New York City Public Health Laboratory               | Jade Wang, et al.              |
| EPI_ISL_683859                                                 | DOHMH Central Harlem | New York City Public Health Laboratory               | Jade Wang, et al.              |
| EPI_ISL_683860                                                 | DOHMH Corona         | New York City Public Health Laboratory               | Jade Wang, et al.              |
| EPI_ISL_683861, EPI_ISL_683862                                 | DOHMH Jamaica        | New York City Public Health Laboratory               | Jade Wang, et al.              |
| EPI_ISL_683863                                                 | DOHMH Morrisania     | New York City Public Health Laboratory               | Jade Wang, et al.              |
| EPI_ISL_683864                                                 | DOHMH Jamaica        | New York City Public Health Laboratory               | Jade Wang, et al.              |
| EPI_ISL_683865                                                 | DOHMH Chelsea        | New York City Public Health Laboratory               | Jade Wang, et al.              |
| EPI_ISL_683866                                                 | DOHMH Riverside      | New York City Public Health Laboratory               | Jade Wang, et al.              |
| EPI_ISL_683867                                                 | DOHMH Corona         | New York City Public Health Laboratory               | Jade Wang, et al.              |
| EPI_ISL_683868                                                 | DOHMH Fort Greene    | New York City Public Health Laboratory               | Jade Wang, et al.              |
| EPI_ISL_683869                                                 | DOHMH Morrisania     | New York City Public Health Laboratory               | Jade Wang, et al.              |

[illegible]

|                                                                                                                                                                                                                                                                                                                                                                                                                                                                                                                                                                                                                                                                                                                                                                                                                                                                                                                                                                                                                                                                                                                                                                                                                                |                                                                                |                                                            |                                                                                                                                                       |
|--------------------------------------------------------------------------------------------------------------------------------------------------------------------------------------------------------------------------------------------------------------------------------------------------------------------------------------------------------------------------------------------------------------------------------------------------------------------------------------------------------------------------------------------------------------------------------------------------------------------------------------------------------------------------------------------------------------------------------------------------------------------------------------------------------------------------------------------------------------------------------------------------------------------------------------------------------------------------------------------------------------------------------------------------------------------------------------------------------------------------------------------------------------------------------------------------------------------------------|--------------------------------------------------------------------------------|------------------------------------------------------------|-------------------------------------------------------------------------------------------------------------------------------------------------------|
| EPI_ISL_683943                                                                                                                                                                                                                                                                                                                                                                                                                                                                                                                                                                                                                                                                                                                                                                                                                                                                                                                                                                                                                                                                                                                                                                                                                 | DOHMH PHL                                                                      | New York City Public Health Laboratory                     | Jade Wang, et al.                                                                                                                                     |
| EPI_ISL_683944, EPI_ISL_683945                                                                                                                                                                                                                                                                                                                                                                                                                                                                                                                                                                                                                                                                                                                                                                                                                                                                                                                                                                                                                                                                                                                                                                                                 | DOHMH Jamaica                                                                  | New York City Public Health Laboratory                     | Jade Wang, et al.                                                                                                                                     |
| EPI_ISL_683946, EPI_ISL_683947                                                                                                                                                                                                                                                                                                                                                                                                                                                                                                                                                                                                                                                                                                                                                                                                                                                                                                                                                                                                                                                                                                                                                                                                 | DOHMH Morrisania                                                               | New York City Public Health Laboratory                     | Jade Wang, et al.                                                                                                                                     |
| EPI_ISL_683948                                                                                                                                                                                                                                                                                                                                                                                                                                                                                                                                                                                                                                                                                                                                                                                                                                                                                                                                                                                                                                                                                                                                                                                                                 | DOHMH Jamaica                                                                  | New York City Public Health Laboratory                     | Jade Wang, et al.                                                                                                                                     |
| EPI_ISL_683949, EPI_ISL_683950                                                                                                                                                                                                                                                                                                                                                                                                                                                                                                                                                                                                                                                                                                                                                                                                                                                                                                                                                                                                                                                                                                                                                                                                 | DOHMH Riverside                                                                | New York City Public Health Laboratory                     | Jade Wang, et al.                                                                                                                                     |
| EPI_ISL_683951                                                                                                                                                                                                                                                                                                                                                                                                                                                                                                                                                                                                                                                                                                                                                                                                                                                                                                                                                                                                                                                                                                                                                                                                                 | DOHMH Jamaica                                                                  | New York City Public Health Laboratory                     | Jade Wang, et al.                                                                                                                                     |
| EPI_ISL_683952, EPI_ISL_683953                                                                                                                                                                                                                                                                                                                                                                                                                                                                                                                                                                                                                                                                                                                                                                                                                                                                                                                                                                                                                                                                                                                                                                                                 | DOHMH Corona                                                                   | New York City Public Health Laboratory                     | Jade Wang, et al.                                                                                                                                     |
| EPI_ISL_683954                                                                                                                                                                                                                                                                                                                                                                                                                                                                                                                                                                                                                                                                                                                                                                                                                                                                                                                                                                                                                                                                                                                                                                                                                 | DOHMH PHL                                                                      | New York City Public Health Laboratory                     | Jade Wang, et al.                                                                                                                                     |
| EPI_ISL_683955                                                                                                                                                                                                                                                                                                                                                                                                                                                                                                                                                                                                                                                                                                                                                                                                                                                                                                                                                                                                                                                                                                                                                                                                                 | DOHMH Riverside                                                                | New York City Public Health Laboratory                     | Jade Wang, et al.                                                                                                                                     |
| EPI_ISL_683956                                                                                                                                                                                                                                                                                                                                                                                                                                                                                                                                                                                                                                                                                                                                                                                                                                                                                                                                                                                                                                                                                                                                                                                                                 | DOHMH Jamaica                                                                  | New York City Public Health Laboratory                     | Jade Wang, et al.                                                                                                                                     |
| EPI_ISL_683957                                                                                                                                                                                                                                                                                                                                                                                                                                                                                                                                                                                                                                                                                                                                                                                                                                                                                                                                                                                                                                                                                                                                                                                                                 | DOHMH Chelsea                                                                  | New York City Public Health Laboratory                     | Jade Wang, et al.                                                                                                                                     |
| EPI_ISL_683958                                                                                                                                                                                                                                                                                                                                                                                                                                                                                                                                                                                                                                                                                                                                                                                                                                                                                                                                                                                                                                                                                                                                                                                                                 | DOHMH Jamaica                                                                  | New York City Public Health Laboratory                     | Jade Wang, et al.                                                                                                                                     |
| EPI_ISL_683959                                                                                                                                                                                                                                                                                                                                                                                                                                                                                                                                                                                                                                                                                                                                                                                                                                                                                                                                                                                                                                                                                                                                                                                                                 | DOHMH Morrisania                                                               | New York City Public Health Laboratory                     | Jade Wang, et al.                                                                                                                                     |
| EPI_ISL_683960                                                                                                                                                                                                                                                                                                                                                                                                                                                                                                                                                                                                                                                                                                                                                                                                                                                                                                                                                                                                                                                                                                                                                                                                                 | DOHMH Corona                                                                   | New York City Public Health Laboratory                     | Jade Wang, et al.                                                                                                                                     |
| EPI_ISL_683961                                                                                                                                                                                                                                                                                                                                                                                                                                                                                                                                                                                                                                                                                                                                                                                                                                                                                                                                                                                                                                                                                                                                                                                                                 | DOHMH Chelsea                                                                  | New York City Public Health Laboratory                     | Jade Wang, et al.                                                                                                                                     |
| EPI_ISL_683962                                                                                                                                                                                                                                                                                                                                                                                                                                                                                                                                                                                                                                                                                                                                                                                                                                                                                                                                                                                                                                                                                                                                                                                                                 | DOHMH Central Harlem                                                           | New York City Public Health Laboratory                     | Jade Wang, et al.                                                                                                                                     |
| EPI_ISL_683963                                                                                                                                                                                                                                                                                                                                                                                                                                                                                                                                                                                                                                                                                                                                                                                                                                                                                                                                                                                                                                                                                                                                                                                                                 | DOHMH Fort Greene                                                              | New York City Public Health Laboratory                     | Jade Wang, et al.                                                                                                                                     |
| EPI_ISL_683964                                                                                                                                                                                                                                                                                                                                                                                                                                                                                                                                                                                                                                                                                                                                                                                                                                                                                                                                                                                                                                                                                                                                                                                                                 | DOHMH Central Harlem                                                           | New York City Public Health Laboratory                     | Jade Wang, et al.                                                                                                                                     |
| EPI_ISL_683965, EPI_ISL_683966                                                                                                                                                                                                                                                                                                                                                                                                                                                                                                                                                                                                                                                                                                                                                                                                                                                                                                                                                                                                                                                                                                                                                                                                 | DOHMH Morrisania                                                               | New York City Public Health Laboratory                     | Jade Wang, et al.                                                                                                                                     |
| EPI_ISL_683967                                                                                                                                                                                                                                                                                                                                                                                                                                                                                                                                                                                                                                                                                                                                                                                                                                                                                                                                                                                                                                                                                                                                                                                                                 | DOHMH Chelsea                                                                  | New York City Public Health Laboratory                     | Jade Wang, et al.                                                                                                                                     |
| EPI_ISL_683968                                                                                                                                                                                                                                                                                                                                                                                                                                                                                                                                                                                                                                                                                                                                                                                                                                                                                                                                                                                                                                                                                                                                                                                                                 | DOHMH Central Harlem                                                           | New York City Public Health Laboratory                     | Jade Wang, et al.                                                                                                                                     |
| EPI_ISL_683969                                                                                                                                                                                                                                                                                                                                                                                                                                                                                                                                                                                                                                                                                                                                                                                                                                                                                                                                                                                                                                                                                                                                                                                                                 | DOHMH Morrisania                                                               | New York City Public Health Laboratory                     | Jade Wang, et al.                                                                                                                                     |
| EPI_ISL_683970                                                                                                                                                                                                                                                                                                                                                                                                                                                                                                                                                                                                                                                                                                                                                                                                                                                                                                                                                                                                                                                                                                                                                                                                                 | DOHMH Crown Heights                                                            | New York City Public Health Laboratory                     | Jade Wang, et al.                                                                                                                                     |
| EPI_ISL_683971, EPI_ISL_683972                                                                                                                                                                                                                                                                                                                                                                                                                                                                                                                                                                                                                                                                                                                                                                                                                                                                                                                                                                                                                                                                                                                                                                                                 | DOHMH Chelsea                                                                  | New York City Public Health Laboratory                     | Jade Wang, et al.                                                                                                                                     |
| EPI_ISL_683973                                                                                                                                                                                                                                                                                                                                                                                                                                                                                                                                                                                                                                                                                                                                                                                                                                                                                                                                                                                                                                                                                                                                                                                                                 | DOHMH Fort Greene                                                              | New York City Public Health Laboratory                     | Jade Wang, et al.                                                                                                                                     |
| EPI_ISL_683974                                                                                                                                                                                                                                                                                                                                                                                                                                                                                                                                                                                                                                                                                                                                                                                                                                                                                                                                                                                                                                                                                                                                                                                                                 | DOHMH Central Harlem                                                           | New York City Public Health Laboratory                     | Jade Wang, et al.                                                                                                                                     |
| EPI_ISL_683975                                                                                                                                                                                                                                                                                                                                                                                                                                                                                                                                                                                                                                                                                                                                                                                                                                                                                                                                                                                                                                                                                                                                                                                                                 | DOHMH Jamaica                                                                  | New York City Public Health Laboratory                     | Jade Wang, et al.                                                                                                                                     |
| EPI_ISL_683976, EPI_ISL_683977                                                                                                                                                                                                                                                                                                                                                                                                                                                                                                                                                                                                                                                                                                                                                                                                                                                                                                                                                                                                                                                                                                                                                                                                 | DOHMH Central Harlem                                                           | New York City Public Health Laboratory                     | Jade Wang, et al.                                                                                                                                     |
| EPI_ISL_683978, EPI_ISL_683979                                                                                                                                                                                                                                                                                                                                                                                                                                                                                                                                                                                                                                                                                                                                                                                                                                                                                                                                                                                                                                                                                                                                                                                                 | DOHMH Corona                                                                   | New York City Public Health Laboratory                     | Jade Wang, et al.                                                                                                                                     |
| EPI_ISL_683980, EPI_ISL_683981                                                                                                                                                                                                                                                                                                                                                                                                                                                                                                                                                                                                                                                                                                                                                                                                                                                                                                                                                                                                                                                                                                                                                                                                 | DOHMH Chelsea                                                                  | New York City Public Health Laboratory                     | Jade Wang, et al.                                                                                                                                     |
| EPI_ISL_683982, EPI_ISL_683983, EPI_ISL_683984, EPI_ISL_683985                                                                                                                                                                                                                                                                                                                                                                                                                                                                                                                                                                                                                                                                                                                                                                                                                                                                                                                                                                                                                                                                                                                                                                 | DOHMH Central Harlem                                                           | New York City Public Health Laboratory                     | Jade Wang, et al.                                                                                                                                     |
| EPI_ISL_683986                                                                                                                                                                                                                                                                                                                                                                                                                                                                                                                                                                                                                                                                                                                                                                                                                                                                                                                                                                                                                                                                                                                                                                                                                 | DOHMH Jamaica                                                                  | New York City Public Health Laboratory                     | Jade Wang, et al.                                                                                                                                     |
| EPI_ISL_683987, EPI_ISL_683988                                                                                                                                                                                                                                                                                                                                                                                                                                                                                                                                                                                                                                                                                                                                                                                                                                                                                                                                                                                                                                                                                                                                                                                                 | DOHMH PHL                                                                      | New York City Public Health Laboratory                     | Jade Wang, et al.                                                                                                                                     |
| EPI_ISL_683989                                                                                                                                                                                                                                                                                                                                                                                                                                                                                                                                                                                                                                                                                                                                                                                                                                                                                                                                                                                                                                                                                                                                                                                                                 | DOHMH Chelsea                                                                  | New York City Public Health Laboratory                     | Jade Wang, et al.                                                                                                                                     |
| EPI_ISL_683990                                                                                                                                                                                                                                                                                                                                                                                                                                                                                                                                                                                                                                                                                                                                                                                                                                                                                                                                                                                                                                                                                                                                                                                                                 | DOHMH Jamaica                                                                  | New York City Public Health Laboratory                     | Jade Wang, et al.                                                                                                                                     |
| EPI_ISL_683991                                                                                                                                                                                                                                                                                                                                                                                                                                                                                                                                                                                                                                                                                                                                                                                                                                                                                                                                                                                                                                                                                                                                                                                                                 | DOHMH Central Harlem                                                           | New York City Public Health Laboratory                     | Jade Wang, et al.                                                                                                                                     |
| EPI_ISL_683992                                                                                                                                                                                                                                                                                                                                                                                                                                                                                                                                                                                                                                                                                                                                                                                                                                                                                                                                                                                                                                                                                                                                                                                                                 | DOHMH Morrisania                                                               | New York City Public Health Laboratory                     | Jade Wang, et al.                                                                                                                                     |
| EPI_ISL_683993                                                                                                                                                                                                                                                                                                                                                                                                                                                                                                                                                                                                                                                                                                                                                                                                                                                                                                                                                                                                                                                                                                                                                                                                                 | DOHMH PHL                                                                      | New York City Public Health Laboratory                     | Jade Wang, et al.                                                                                                                                     |
| EPI_ISL_683994                                                                                                                                                                                                                                                                                                                                                                                                                                                                                                                                                                                                                                                                                                                                                                                                                                                                                                                                                                                                                                                                                                                                                                                                                 | DOHMH Riverside                                                                | New York City Public Health Laboratory                     | Jade Wang, et al.                                                                                                                                     |
| EPI_ISL_683995                                                                                                                                                                                                                                                                                                                                                                                                                                                                                                                                                                                                                                                                                                                                                                                                                                                                                                                                                                                                                                                                                                                                                                                                                 | DOHMH PHL                                                                      | New York City Public Health Laboratory                     | Jade Wang, et al.                                                                                                                                     |
| EPI_ISL_683996                                                                                                                                                                                                                                                                                                                                                                                                                                                                                                                                                                                                                                                                                                                                                                                                                                                                                                                                                                                                                                                                                                                                                                                                                 | DOHMH Fort Greene                                                              | New York City Public Health Laboratory                     | Jade Wang, et al.                                                                                                                                     |
| EPI_ISL_684000, EPI_ISL_684002, EPI_ISL_684003, EPI_ISL_684004, EPI_ISL_684005, EPI_ISL_684006, EPI_ISL_684007, EPI_ISL_684008, EPI_ISL_684010, EPI_ISL_684011, EPI_ISL_684012, EPI_ISL_684013, EPI_ISL_684015, EPI_ISL_684016, EPI_ISL_684017, EPI_ISL_684018, EPI_ISL_684020, EPI_ISL_684021, EPI_ISL_684023, EPI_ISL_684024, EPI_ISL_684026, EPI_ISL_684027                                                                                                                                                                                                                                                                                                                                                                                                                                                                                                                                                                                                                                                                                                                                                                                                                                                                 |                                                                                |                                                            |                                                                                                                                                       |
| see above                                                                                                                                                                                                                                                                                                                                                                                                                                                                                                                                                                                                                                                                                                                                                                                                                                                                                                                                                                                                                                                                                                                                                                                                                      | Utah Public Health Laboratory                                                  | Utah Public Health Laboratory                              | Erin Young, Kelly Oakeson                                                                                                                             |
| EPI_ISL_684028, EPI_ISL_684029, EPI_ISL_684030, EPI_ISL_684031, EPI_ISL_684032, EPI_ISL_684033, EPI_ISL_684034, EPI_ISL_684035, EPI_ISL_684036                                                                                                                                                                                                                                                                                                                                                                                                                                                                                                                                                                                                                                                                                                                                                                                                                                                                                                                                                                                                                                                                                 | Communicable Disease Laboratory, Public Health Directorate                     | Communicable Disease Laboratory, Public Health Directorate | Alwasti,H., Altaif,Z., AlHujairi,Z., AlAbbas,Z.                                                                                                       |
| EPI_ISL_684047                                                                                                                                                                                                                                                                                                                                                                                                                                                                                                                                                                                                                                                                                                                                                                                                                                                                                                                                                                                                                                                                                                                                                                                                                 | NHLS Universitas Academic                                                      | UFS Virology                                               | PA Bester, MM Nyaga, P Nthiga, MT Mogotsi, D Goedhals, T de Oliveira                                                                                  |
| EPI_ISL_686108, EPI_ISL_686536, EPI_ISL_686537, EPI_ISL_686538, EPI_ISL_686539, EPI_ISL_686540, EPI_ISL_686541, EPI_ISL_686542, EPI_ISL_686543, EPI_ISL_686544, EPI_ISL_686545, EPI_ISL_686547, EPI_ISL_686548, EPI_ISL_686549, EPI_ISL_686550, EPI_ISL_686551, EPI_ISL_686552, EPI_ISL_686553, EPI_ISL_686554, EPI_ISL_686555, EPI_ISL_686556, EPI_ISL_686557, EPI_ISL_686558, EPI_ISL_686559, EPI_ISL_686560, EPI_ISL_686561, EPI_ISL_686562, EPI_ISL_686563, EPI_ISL_686564, EPI_ISL_686565, EPI_ISL_686566, EPI_ISL_686567, EPI_ISL_686568, EPI_ISL_686569, EPI_ISL_686570, EPI_ISL_686571, EPI_ISL_686572, EPI_ISL_686573, EPI_ISL_686574, EPI_ISL_686575, EPI_ISL_686576, EPI_ISL_686577, EPI_ISL_686578, EPI_ISL_686579, EPI_ISL_686580, EPI_ISL_686581, EPI_ISL_686582, EPI_ISL_686583, EPI_ISL_686584, EPI_ISL_686585, EPI_ISL_686586, EPI_ISL_686587, EPI_ISL_686588, EPI_ISL_686589, EPI_ISL_686590, EPI_ISL_686591, EPI_ISL_686592, EPI_ISL_686593, EPI_ISL_686594, EPI_ISL_686595, EPI_ISL_686596, EPI_ISL_686598, EPI_ISL_686599, EPI_ISL_686600, EPI_ISL_686601, EPI_ISL_686602, EPI_ISL_686603, EPI_ISL_686604, EPI_ISL_686605, EPI_ISL_686606, EPI_ISL_686607, EPI_ISL_686608, EPI_ISL_686609, EPI_ISL_686611 |                                                                                |                                                            |                                                                                                                                                       |
| see above                                                                                                                                                                                                                                                                                                                                                                                                                                                                                                                                                                                                                                                                                                                                                                                                                                                                                                                                                                                                                                                                                                                                                                                                                      | Respiratory Virus Unit, Microbiology Services Colindale, Public Health England | COVID-19 Genomics UK (COG-UK) Consortium                   | PHE Covid Sequencing Team                                                                                                                             |
| EPI_ISL_691612, EPI_ISL_691613, EPI_ISL_691614, EPI_ISL_691615, EPI_ISL_691616, EPI_ISL_691617, EPI_ISL_691618, EPI_ISL_691620, EPI_ISL_691621, EPI_ISL_691622, EPI_ISL_691624, EPI_ISL_691625, EPI_ISL_691626, EPI_ISL_691627, EPI_ISL_691628, EPI_ISL_691629, EPI_ISL_691630, EPI_ISL_691631, EPI_ISL_691632, EPI_ISL_691633, EPI_ISL_691634, EPI_ISL_691635, EPI_ISL_691636, EPI_ISL_691637, EPI_ISL_691638, EPI_ISL_691641, EPI_ISL_691663, EPI_ISL_691664, EPI_ISL_691665, EPI_ISL_691667, EPI_ISL_691668, EPI_ISL_691669, EPI_ISL_691670, EPI_ISL_691671, EPI_ISL_691672, EPI_ISL_691673, EPI_ISL_691674, EPI_ISL_691675, EPI_ISL_691676, EPI_ISL_691678, EPI_ISL_691679, EPI_ISL_691680                                                                                                                                                                                                                                                                                                                                                                                                                                                                                                                                 |                                                                                |                                                            |                                                                                                                                                       |
| see above                                                                                                                                                                                                                                                                                                                                                                                                                                                                                                                                                                                                                                                                                                                                                                                                                                                                                                                                                                                                                                                                                                                                                                                                                      | Servicio de Microbiología, Hospital Universitario Son Espases                  | SeqCOVID-SPAIN consortium/IBV(CSIC)                        | Carla López-Causapé, Jordi Reina, Antonio Oliver and SeqCOVID-SPAIN consortium                                                                        |
| EPI_ISL_691685                                                                                                                                                                                                                                                                                                                                                                                                                                                                                                                                                                                                                                                                                                                                                                                                                                                                                                                                                                                                                                                                                                                                                                                                                 | Hospital de Leon                                                               | Instituto de Salud Carlos III                              | Iglesias-Caballero, M. Camarero, S. Molinero Calamita, M. González-Esguevillas, M. Pozo, F. Casas, I. Jiménez, P. Jiménez, M. Zaballos, A. Monzón, S. |

|                                                                                                                                                                                                                                                                                                                                                                                                                                                                                                                                                                                                                                                                                                                                                                                                                                                                                                                                                                                                                                                                                                                                                                                                                                                                                                                                                                                                                                                                                                                                                                                                                                                                                                                                                                                                                                                                                                                                                                                                |                                                         |                                                                                  |                                                                                                                                                                                                     |
|------------------------------------------------------------------------------------------------------------------------------------------------------------------------------------------------------------------------------------------------------------------------------------------------------------------------------------------------------------------------------------------------------------------------------------------------------------------------------------------------------------------------------------------------------------------------------------------------------------------------------------------------------------------------------------------------------------------------------------------------------------------------------------------------------------------------------------------------------------------------------------------------------------------------------------------------------------------------------------------------------------------------------------------------------------------------------------------------------------------------------------------------------------------------------------------------------------------------------------------------------------------------------------------------------------------------------------------------------------------------------------------------------------------------------------------------------------------------------------------------------------------------------------------------------------------------------------------------------------------------------------------------------------------------------------------------------------------------------------------------------------------------------------------------------------------------------------------------------------------------------------------------------------------------------------------------------------------------------------------------|---------------------------------------------------------|----------------------------------------------------------------------------------|-----------------------------------------------------------------------------------------------------------------------------------------------------------------------------------------------------|
| Varona, S. Juliá, M. Cuesta, I. Vidan, J.                                                                                                                                                                                                                                                                                                                                                                                                                                                                                                                                                                                                                                                                                                                                                                                                                                                                                                                                                                                                                                                                                                                                                                                                                                                                                                                                                                                                                                                                                                                                                                                                                                                                                                                                                                                                                                                                                                                                                      |                                                         |                                                                                  |                                                                                                                                                                                                     |
| EPI_ISL_691686, EPI_ISL_691687, EPI_ISL_691688, EPI_ISL_691689, EPI_ISL_691690, EPI_ISL_691691, EPI_ISL_691692, EPI_ISL_691693, EPI_ISL_691694, EPI_ISL_691695, EPI_ISL_691696, EPI_ISL_691697, EPI_ISL_691698, EPI_ISL_691699                                                                                                                                                                                                                                                                                                                                                                                                                                                                                                                                                                                                                                                                                                                                                                                                                                                                                                                                                                                                                                                                                                                                                                                                                                                                                                                                                                                                                                                                                                                                                                                                                                                                                                                                                                 |                                                         |                                                                                  |                                                                                                                                                                                                     |
| see above                                                                                                                                                                                                                                                                                                                                                                                                                                                                                                                                                                                                                                                                                                                                                                                                                                                                                                                                                                                                                                                                                                                                                                                                                                                                                                                                                                                                                                                                                                                                                                                                                                                                                                                                                                                                                                                                                                                                                                                      | Hospital Universitario de Ceuta                         | Instituto de Salud Carlos III                                                    | Iglesias-Caballero, M. Camarero, S. Molinero Calamita, M. González-Esguevillas, M. Pozo, F. Casas, I. Jiménez, P. Jiménez, M. Zaballos, A. Monzón, S. Varona, S. Juliá, M. Cuesta, I. Híjano, S.    |
| EPI_ISL_691700, EPI_ISL_691701, EPI_ISL_691702, EPI_ISL_691703, EPI_ISL_691704, EPI_ISL_691705, EPI_ISL_691706, EPI_ISL_691707, EPI_ISL_691708, EPI_ISL_691709, EPI_ISL_691710, EPI_ISL_691711, EPI_ISL_691712, EPI_ISL_691713, EPI_ISL_691714, EPI_ISL_691715, EPI_ISL_691716, EPI_ISL_691717, EPI_ISL_691718, EPI_ISL_691719, EPI_ISL_691720, EPI_ISL_691721, EPI_ISL_691722, EPI_ISL_691723, EPI_ISL_691724, EPI_ISL_691725, EPI_ISL_691726, EPI_ISL_691727, EPI_ISL_691728                                                                                                                                                                                                                                                                                                                                                                                                                                                                                                                                                                                                                                                                                                                                                                                                                                                                                                                                                                                                                                                                                                                                                                                                                                                                                                                                                                                                                                                                                                                 |                                                         |                                                                                  |                                                                                                                                                                                                     |
| see above                                                                                                                                                                                                                                                                                                                                                                                                                                                                                                                                                                                                                                                                                                                                                                                                                                                                                                                                                                                                                                                                                                                                                                                                                                                                                                                                                                                                                                                                                                                                                                                                                                                                                                                                                                                                                                                                                                                                                                                      | Hospital Clínico San Carlos                             | Instituto de Salud Carlos III                                                    | Iglesias-Caballero, M. Camarero, S. Molinero Calamita, M. González-Esguevillas, M. Pozo, F. Casas, I. Jiménez, P. Jiménez, M. Zaballos, A. Monzón, S. Varona, S. Juliá, M. Cuesta, I. Rodríguez, I. |
| EPI_ISL_691729, EPI_ISL_691730                                                                                                                                                                                                                                                                                                                                                                                                                                                                                                                                                                                                                                                                                                                                                                                                                                                                                                                                                                                                                                                                                                                                                                                                                                                                                                                                                                                                                                                                                                                                                                                                                                                                                                                                                                                                                                                                                                                                                                 | Hospital Universitario Severo Ochoa                     | Instituto de Salud Carlos III                                                    | Iglesias-Caballero, M. Camarero, S. Molinero Calamita, M. González-Esguevillas, M. Pozo, F. Casas, I. Jiménez, P. Jiménez, M. Zaballos, A. Monzón, S. Varona, S. Juliá, M. Cuesta, I. García, M.    |
| EPI_ISL_691731                                                                                                                                                                                                                                                                                                                                                                                                                                                                                                                                                                                                                                                                                                                                                                                                                                                                                                                                                                                                                                                                                                                                                                                                                                                                                                                                                                                                                                                                                                                                                                                                                                                                                                                                                                                                                                                                                                                                                                                 | Hospital Universitario Puerta de Hierro                 | Instituto de Salud Carlos III                                                    | Iglesias-Caballero, M. Camarero, S. Molinero Calamita, M. González-Esguevillas, M. Pozo, F. Casas, I. Jiménez, P. Jiménez, M. Zaballos, A. Monzón, S. Varona, S. Juliá, M. Cuesta, I. Velasco, A.   |
| EPI_ISL_691732                                                                                                                                                                                                                                                                                                                                                                                                                                                                                                                                                                                                                                                                                                                                                                                                                                                                                                                                                                                                                                                                                                                                                                                                                                                                                                                                                                                                                                                                                                                                                                                                                                                                                                                                                                                                                                                                                                                                                                                 | Hospital de Madrid                                      | Instituto de Salud Carlos III                                                    | Iglesias-Caballero, M. Camarero, S. Molinero Calamita, M. González-Esguevillas, M. Pozo, F. Casas, I. Jiménez, P. Jiménez, M. Zaballos, A. Monzón, S. Varona, S. Juliá, M. Cuesta, I. Alhambra, A.  |
| EPI_ISL_692733, EPI_ISL_692734, EPI_ISL_692735, EPI_ISL_692736, EPI_ISL_692737, EPI_ISL_692738, EPI_ISL_692739, EPI_ISL_692740, EPI_ISL_692741, EPI_ISL_692742, EPI_ISL_692743, EPI_ISL_692744, EPI_ISL_692745, EPI_ISL_692746, EPI_ISL_692747, EPI_ISL_692748, EPI_ISL_692749, EPI_ISL_692750, EPI_ISL_692751, EPI_ISL_692752, EPI_ISL_692753, EPI_ISL_692754, EPI_ISL_692755, EPI_ISL_692756, EPI_ISL_692757, EPI_ISL_692758, EPI_ISL_692759, EPI_ISL_692760, EPI_ISL_692761, EPI_ISL_692762, EPI_ISL_692763, EPI_ISL_692764, EPI_ISL_692765, EPI_ISL_692766, EPI_ISL_692767, EPI_ISL_692768                                                                                                                                                                                                                                                                                                                                                                                                                                                                                                                                                                                                                                                                                                                                                                                                                                                                                                                                                                                                                                                                                                                                                                                                                                                                                                                                                                                                 |                                                         |                                                                                  |                                                                                                                                                                                                     |
| see above                                                                                                                                                                                                                                                                                                                                                                                                                                                                                                                                                                                                                                                                                                                                                                                                                                                                                                                                                                                                                                                                                                                                                                                                                                                                                                                                                                                                                                                                                                                                                                                                                                                                                                                                                                                                                                                                                                                                                                                      | CNR Virus des Infections Respiratoires - France SUD     | CNR Virus des Infections Respiratoires - France SUD                              | Antonin Bal, Gregory Destras, Gwendolyne Burfin, Solenne Brun, Martine Valette, Bruno Lina, Laurence Josset                                                                                         |
| EPI_ISL_692769, EPI_ISL_692770, EPI_ISL_692771, EPI_ISL_692772, EPI_ISL_692773, EPI_ISL_692774, EPI_ISL_692776, EPI_ISL_692778, EPI_ISL_692780, EPI_ISL_692782, EPI_ISL_692783, EPI_ISL_692784, EPI_ISL_692785, EPI_ISL_692786, EPI_ISL_692787, EPI_ISL_692788, EPI_ISL_692789, EPI_ISL_692790, EPI_ISL_692791, EPI_ISL_692792, EPI_ISL_692794, EPI_ISL_692795, EPI_ISL_692796, EPI_ISL_692798, EPI_ISL_692799, EPI_ISL_692801, EPI_ISL_692803, EPI_ISL_692804, EPI_ISL_692809, EPI_ISL_692810, EPI_ISL_692811, EPI_ISL_692812, EPI_ISL_692813, EPI_ISL_692814, EPI_ISL_692815, EPI_ISL_692816, EPI_ISL_692817, EPI_ISL_692818, EPI_ISL_692819, EPI_ISL_692820, EPI_ISL_692822, EPI_ISL_692834, EPI_ISL_692835, EPI_ISL_692836, EPI_ISL_692837, EPI_ISL_692838, EPI_ISL_692839, EPI_ISL_692840, EPI_ISL_692841, EPI_ISL_692842, EPI_ISL_692843, EPI_ISL_692844, EPI_ISL_692845, EPI_ISL_692846, EPI_ISL_692847, EPI_ISL_692848, EPI_ISL_692849, EPI_ISL_692850, EPI_ISL_692851, EPI_ISL_692852, EPI_ISL_692853, EPI_ISL_692854, EPI_ISL_692855, EPI_ISL_692863, EPI_ISL_692865, EPI_ISL_692866, EPI_ISL_692867, EPI_ISL_692868, EPI_ISL_692869, EPI_ISL_692870, EPI_ISL_692871, EPI_ISL_692873, EPI_ISL_692874, EPI_ISL_692875, EPI_ISL_692876, EPI_ISL_692901, EPI_ISL_692902, EPI_ISL_692903, EPI_ISL_692904, EPI_ISL_692905, EPI_ISL_692908, EPI_ISL_692909, EPI_ISL_692910, EPI_ISL_692911, EPI_ISL_692912, EPI_ISL_692913, EPI_ISL_692915, EPI_ISL_692916, EPI_ISL_692917, EPI_ISL_692918, EPI_ISL_692919, EPI_ISL_692920, EPI_ISL_692921, EPI_ISL_692922, EPI_ISL_692923, EPI_ISL_692924, EPI_ISL_692925, EPI_ISL_692926, EPI_ISL_692927, EPI_ISL_692928, EPI_ISL_692929, EPI_ISL_692930, EPI_ISL_692931, EPI_ISL_692932, EPI_ISL_692933, EPI_ISL_692934, EPI_ISL_692935, EPI_ISL_692936, EPI_ISL_692937, EPI_ISL_692938, EPI_ISL_692939, EPI_ISL_692940, EPI_ISL_692941, EPI_ISL_692942, EPI_ISL_692943, EPI_ISL_692944, EPI_ISL_692945, EPI_ISL_692946, EPI_ISL_693159, EPI_ISL_693170 |                                                         |                                                                                  |                                                                                                                                                                                                     |
| see above                                                                                                                                                                                                                                                                                                                                                                                                                                                                                                                                                                                                                                                                                                                                                                                                                                                                                                                                                                                                                                                                                                                                                                                                                                                                                                                                                                                                                                                                                                                                                                                                                                                                                                                                                                                                                                                                                                                                                                                      | Massachusetts State Public Health Laboratory            | Massachusetts State Public Health Laboratory                                     | Andrew Lang, Timelia Fink, Glen Gallagher, Sandra Smole                                                                                                                                             |
| EPI_ISL_693204                                                                                                                                                                                                                                                                                                                                                                                                                                                                                                                                                                                                                                                                                                                                                                                                                                                                                                                                                                                                                                                                                                                                                                                                                                                                                                                                                                                                                                                                                                                                                                                                                                                                                                                                                                                                                                                                                                                                                                                 | Pronto Socorro Dr. Conrado Cesarino Nuvolini            | Instituto Adolfo Lutz, Interdisciplinary Procedures Center, Strategic Laboratory | Claudio Tavares Sacchi, Claudia Regina Gonçalves, Erica Valessa Ramos Gomes, Karoline Rodrigues Campos                                                                                              |
| EPI_ISL_693205                                                                                                                                                                                                                                                                                                                                                                                                                                                                                                                                                                                                                                                                                                                                                                                                                                                                                                                                                                                                                                                                                                                                                                                                                                                                                                                                                                                                                                                                                                                                                                                                                                                                                                                                                                                                                                                                                                                                                                                 | Hospital de Campanha Covid-19 Assis                     | Instituto Adolfo Lutz, Interdisciplinary Procedures Center, Strategic Laboratory | Claudio Tavares Sacchi, Claudia Regina Gonçalves, Erica Valessa Ramos Gomes, Karoline Rodrigues Campos                                                                                              |
| EPI_ISL_693206                                                                                                                                                                                                                                                                                                                                                                                                                                                                                                                                                                                                                                                                                                                                                                                                                                                                                                                                                                                                                                                                                                                                                                                                                                                                                                                                                                                                                                                                                                                                                                                                                                                                                                                                                                                                                                                                                                                                                                                 | Hospital Municipal Mario Gatti                          | Instituto Adolfo Lutz, Interdisciplinary Procedures Center, Strategic Laboratory | Claudio Tavares Sacchi, Claudia Regina Gonçalves, Erica Valessa Ramos Gomes, Karoline Rodrigues Campos                                                                                              |
| EPI_ISL_693207                                                                                                                                                                                                                                                                                                                                                                                                                                                                                                                                                                                                                                                                                                                                                                                                                                                                                                                                                                                                                                                                                                                                                                                                                                                                                                                                                                                                                                                                                                                                                                                                                                                                                                                                                                                                                                                                                                                                                                                 | Cs II Doutor Antonio Vicoso Moreira de Rezende          | Instituto Adolfo Lutz, Interdisciplinary Procedures Center, Strategic Laboratory | Claudio Tavares Sacchi, Claudia Regina Gonçalves, Erica Valessa Ramos Gomes, Karoline Rodrigues Campos                                                                                              |
| EPI_ISL_693208, EPI_ISL_693209                                                                                                                                                                                                                                                                                                                                                                                                                                                                                                                                                                                                                                                                                                                                                                                                                                                                                                                                                                                                                                                                                                                                                                                                                                                                                                                                                                                                                                                                                                                                                                                                                                                                                                                                                                                                                                                                                                                                                                 | Hospital Municipal Antonio Giglio                       | Instituto Adolfo Lutz, Interdisciplinary Procedures Center, Strategic Laboratory | Claudio Tavares Sacchi, Claudia Regina Gonçalves, Erica Valessa Ramos Gomes, Karoline Rodrigues Campos                                                                                              |
| EPI_ISL_693210                                                                                                                                                                                                                                                                                                                                                                                                                                                                                                                                                                                                                                                                                                                                                                                                                                                                                                                                                                                                                                                                                                                                                                                                                                                                                                                                                                                                                                                                                                                                                                                                                                                                                                                                                                                                                                                                                                                                                                                 | Pronto-Socorro Dr. Osmar Mesquita                       | Instituto Adolfo Lutz, Interdisciplinary Procedures Center, Strategic Laboratory | Claudio Tavares Sacchi, Claudia Regina Gonçalves, Erica Valessa Ramos Gomes, Karoline Rodrigues Campos                                                                                              |
| EPI_ISL_693211                                                                                                                                                                                                                                                                                                                                                                                                                                                                                                                                                                                                                                                                                                                                                                                                                                                                                                                                                                                                                                                                                                                                                                                                                                                                                                                                                                                                                                                                                                                                                                                                                                                                                                                                                                                                                                                                                                                                                                                 | Santa Casa de Misericórdia e Maternidade                | Instituto Adolfo Lutz, Interdisciplinary Procedures Center, Strategic Laboratory | Claudio Tavares Sacchi, Claudia Regina Gonçalves, Erica Valessa Ramos Gomes, Karoline Rodrigues Campos                                                                                              |
| EPI_ISL_693212                                                                                                                                                                                                                                                                                                                                                                                                                                                                                                                                                                                                                                                                                                                                                                                                                                                                                                                                                                                                                                                                                                                                                                                                                                                                                                                                                                                                                                                                                                                                                                                                                                                                                                                                                                                                                                                                                                                                                                                 | Santa Casa de Misericórdia de Braganca Paulista         | Instituto Adolfo Lutz, Interdisciplinary Procedures Center, Strategic Laboratory | Claudio Tavares Sacchi, Claudia Regina Gonçalves, Erica Valessa Ramos Gomes, Karoline Rodrigues Campos                                                                                              |
| EPI_ISL_693213                                                                                                                                                                                                                                                                                                                                                                                                                                                                                                                                                                                                                                                                                                                                                                                                                                                                                                                                                                                                                                                                                                                                                                                                                                                                                                                                                                                                                                                                                                                                                                                                                                                                                                                                                                                                                                                                                                                                                                                 | Hospital E Maternidade Municipal Governador Mario Covas | Instituto Adolfo Lutz, Interdisciplinary Procedures Center, Strategic Laboratory | Claudio Tavares Sacchi, Claudia Regina Gonçalves, Erica Valessa Ramos Gomes, Karoline Rodrigues Campos                                                                                              |
| EPI_ISL_693214                                                                                                                                                                                                                                                                                                                                                                                                                                                                                                                                                                                                                                                                                                                                                                                                                                                                                                                                                                                                                                                                                                                                                                                                                                                                                                                                                                                                                                                                                                                                                                                                                                                                                                                                                                                                                                                                                                                                                                                 | Unidade de Pronto Atendimento Central de Caraguatatuba  | Instituto Adolfo Lutz, Interdisciplinary Procedures Center, Strategic Laboratory | Claudio Tavares Sacchi, Claudia Regina Gonçalves, Erica Valessa Ramos Gomes, Karoline Rodrigues Campos                                                                                              |
| EPI_ISL_693215                                                                                                                                                                                                                                                                                                                                                                                                                                                                                                                                                                                                                                                                                                                                                                                                                                                                                                                                                                                                                                                                                                                                                                                                                                                                                                                                                                                                                                                                                                                                                                                                                                                                                                                                                                                                                                                                                                                                                                                 | Secretaria Municipal de Saúde de Iracemopolis           | Instituto Adolfo Lutz, Interdisciplinary Procedures Center, Strategic Laboratory | Claudio Tavares Sacchi, Claudia Regina Gonçalves, Erica Valessa Ramos Gomes, Karoline Rodrigues Campos                                                                                              |
| EPI_ISL_693216, EPI_ISL_693217                                                                                                                                                                                                                                                                                                                                                                                                                                                                                                                                                                                                                                                                                                                                                                                                                                                                                                                                                                                                                                                                                                                                                                                                                                                                                                                                                                                                                                                                                                                                                                                                                                                                                                                                                                                                                                                                                                                                                                 | Unidade de Vigilância Epidemiológica de Araras          | Instituto Adolfo Lutz, Interdisciplinary Procedures Center, Strategic Laboratory | Claudio Tavares Sacchi, Claudia Regina Gonçalves, Erica Valessa Ramos Gomes, Karoline Rodrigues Campos                                                                                              |
| EPI_ISL_693218                                                                                                                                                                                                                                                                                                                                                                                                                                                                                                                                                                                                                                                                                                                                                                                                                                                                                                                                                                                                                                                                                                                                                                                                                                                                                                                                                                                                                                                                                                                                                                                                                                                                                                                                                                                                                                                                                                                                                                                 | Hospital Domingos Leonardo Ceravolo Presidente Prudente | Instituto Adolfo Lutz, Interdisciplinary Procedures Center, Strategic Laboratory | Claudio Tavares Sacchi, Claudia Regina Gonçalves, Erica Valessa Ramos Gomes, Karoline Rodrigues Campos                                                                                              |
| EPI_ISL_693219                                                                                                                                                                                                                                                                                                                                                                                                                                                                                                                                                                                                                                                                                                                                                                                                                                                                                                                                                                                                                                                                                                                                                                                                                                                                                                                                                                                                                                                                                                                                                                                                                                                                                                                                                                                                                                                                                                                                                                                 | Santa Casa da Misericórdia de Presidente Prudente       | Instituto Adolfo Lutz, Interdisciplinary Procedures Center, Strategic Laboratory | Claudio Tavares Sacchi, Claudia Regina Gonçalves, Erica Valessa Ramos Gomes, Karoline Rodrigues Campos                                                                                              |
| EPI_ISL_693220                                                                                                                                                                                                                                                                                                                                                                                                                                                                                                                                                                                                                                                                                                                                                                                                                                                                                                                                                                                                                                                                                                                                                                                                                                                                                                                                                                                                                                                                                                                                                                                                                                                                                                                                                                                                                                                                                                                                                                                 | Laboratório Municipal de Piracicaba                     | Instituto Adolfo Lutz, Interdisciplinary Procedures Center, Strategic Laboratory | Claudio Tavares Sacchi, Claudia Regina Gonçalves, Erica Valessa Ramos Gomes, Karoline Rodrigues Campos                                                                                              |
| EPI_ISL_693221, EPI_ISL_693222                                                                                                                                                                                                                                                                                                                                                                                                                                                                                                                                                                                                                                                                                                                                                                                                                                                                                                                                                                                                                                                                                                                                                                                                                                                                                                                                                                                                                                                                                                                                                                                                                                                                                                                                                                                                                                                                                                                                                                 | Secretaria Municipal de Saúde de Birigui                | Instituto Adolfo Lutz, Interdisciplinary Procedures Center, Strategic Laboratory | Claudio Tavares Sacchi, Claudia Regina Gonçalves, Erica Valessa Ramos Gomes, Karoline Rodrigues Campos                                                                                              |
| EPI_ISL_693223, EPI_ISL_693224                                                                                                                                                                                                                                                                                                                                                                                                                                                                                                                                                                                                                                                                                                                                                                                                                                                                                                                                                                                                                                                                                                                                                                                                                                                                                                                                                                                                                                                                                                                                                                                                                                                                                                                                                                                                                                                                                                                                                                 | Laboratório Municipal de Piracicaba                     | Instituto Adolfo Lutz, Interdisciplinary Procedures Center, Strategic Laboratory | Claudio Tavares Sacchi, Claudia Regina Gonçalves, Erica Valessa Ramos Gomes, Karoline Rodrigues Campos                                                                                              |
| EPI_ISL_693225                                                                                                                                                                                                                                                                                                                                                                                                                                                                                                                                                                                                                                                                                                                                                                                                                                                                                                                                                                                                                                                                                                                                                                                                                                                                                                                                                                                                                                                                                                                                                                                                                                                                                                                                                                                                                                                                                                                                                                                 | Ubs Vila Rosa - Olimpia Gomes De Almeida                | Instituto Adolfo Lutz, Interdisciplinary Procedures Center, Strategic Laboratory | Claudio Tavares Sacchi, Claudia Regina Gonçalves, Erica Valessa Ramos Gomes, Karoline Rodrigues Campos                                                                                              |
| EPI_ISL_693226                                                                                                                                                                                                                                                                                                                                                                                                                                                                                                                                                                                                                                                                                                                                                                                                                                                                                                                                                                                                                                                                                                                                                                                                                                                                                                                                                                                                                                                                                                                                                                                                                                                                                                                                                                                                                                                                                                                                                                                 | Unidade de Pronto Atendimento Sao José                  | Instituto Adolfo Lutz, Interdisciplinary Procedures Center, Strategic Laboratory | Claudio Tavares Sacchi, Claudia Regina Gonçalves, Erica Valessa Ramos Gomes, Karoline Rodrigues Campos                                                                                              |
| EPI_ISL_693227                                                                                                                                                                                                                                                                                                                                                                                                                                                                                                                                                                                                                                                                                                                                                                                                                                                                                                                                                                                                                                                                                                                                                                                                                                                                                                                                                                                                                                                                                                                                                                                                                                                                                                                                                                                                                                                                                                                                                                                 | UBS Vila Marchi                                         | Instituto Adolfo Lutz, Interdisciplinary Procedures Center, Strategic Laboratory | Claudio Tavares Sacchi, Claudia Regina Gonçalves, Erica Valessa Ramos Gomes, Karoline Rodrigues Campos                                                                                              |
| EPI_ISL_693228                                                                                                                                                                                                                                                                                                                                                                                                                                                                                                                                                                                                                                                                                                                                                                                                                                                                                                                                                                                                                                                                                                                                                                                                                                                                                                                                                                                                                                                                                                                                                                                                                                                                                                                                                                                                                                                                                                                                                                                 | Secretaria Municipal de Sorocaba                        | Instituto Adolfo Lutz, Interdisciplinary Procedures Center, Strategic Laboratory | Claudio Tavares Sacchi, Claudia Regina Gonçalves, Erica Valessa Ramos Gomes, Karoline Rodrigues Campos                                                                                              |
| EPI_ISL_693229                                                                                                                                                                                                                                                                                                                                                                                                                                                                                                                                                                                                                                                                                                                                                                                                                                                                                                                                                                                                                                                                                                                                                                                                                                                                                                                                                                                                                                                                                                                                                                                                                                                                                                                                                                                                                                                                                                                                                                                 | Hospital 8 de Maio                                      | Instituto Adolfo Lutz, Interdisciplinary Procedures Center, Strategic Laboratory | Claudio Tavares Sacchi, Claudia Regina Gonçalves, Erica Valessa Ramos Gomes, Karoline Rodrigues Campos                                                                                              |
| EPI_ISL_693230                                                                                                                                                                                                                                                                                                                                                                                                                                                                                                                                                                                                                                                                                                                                                                                                                                                                                                                                                                                                                                                                                                                                                                                                                                                                                                                                                                                                                                                                                                                                                                                                                                                                                                                                                                                                                                                                                                                                                                                 | Hospital e Pronto Socorro Portinari                     | Instituto Adolfo Lutz, Interdisciplinary Procedures Center, Strategic Laboratory | Claudio Tavares Sacchi, Claudia Regina Gonçalves, Erica Valessa Ramos Gomes, Karoline Rodrigues Campos                                                                                              |



|                                                                                                                                                                                                                                                                                                                                                                                                                                                                                                                                                                                                                                                                                                                                                                                                                                                                                                                                                                                                                                                                                                                                                                                                                                                                                                                                                                                                                                                |                                                                                |                                                                                                   |                                                                                                                                                                                                                                                                                                   |
|------------------------------------------------------------------------------------------------------------------------------------------------------------------------------------------------------------------------------------------------------------------------------------------------------------------------------------------------------------------------------------------------------------------------------------------------------------------------------------------------------------------------------------------------------------------------------------------------------------------------------------------------------------------------------------------------------------------------------------------------------------------------------------------------------------------------------------------------------------------------------------------------------------------------------------------------------------------------------------------------------------------------------------------------------------------------------------------------------------------------------------------------------------------------------------------------------------------------------------------------------------------------------------------------------------------------------------------------------------------------------------------------------------------------------------------------|--------------------------------------------------------------------------------|---------------------------------------------------------------------------------------------------|---------------------------------------------------------------------------------------------------------------------------------------------------------------------------------------------------------------------------------------------------------------------------------------------------|
| EPI_ISL_693231                                                                                                                                                                                                                                                                                                                                                                                                                                                                                                                                                                                                                                                                                                                                                                                                                                                                                                                                                                                                                                                                                                                                                                                                                                                                                                                                                                                                                                 | Pronto Socorro Municipal de Santa Branca                                       | Instituto Adolfo Lutz, Interdisciplinary Procedures Center, Strategic Laboratory                  | Claudio Tavares Sacchi, Claudia Regina Gonçalves, Erica Valessa Ramos Gomes, Karoline Rodrigues Campos                                                                                                                                                                                            |
| EPI_ISL_693233                                                                                                                                                                                                                                                                                                                                                                                                                                                                                                                                                                                                                                                                                                                                                                                                                                                                                                                                                                                                                                                                                                                                                                                                                                                                                                                                                                                                                                 | Hospital Santa Cruz                                                            | Instituto Adolfo Lutz, Interdisciplinary Procedures Center, Strategic Laboratory                  | Claudio Tavares Sacchi, Claudia Regina Gonçalves, Erica Valessa Ramos Gomes, Karoline Rodrigues Campos                                                                                                                                                                                            |
| EPI_ISL_693234                                                                                                                                                                                                                                                                                                                                                                                                                                                                                                                                                                                                                                                                                                                                                                                                                                                                                                                                                                                                                                                                                                                                                                                                                                                                                                                                                                                                                                 | Upa Vereador Jose Da Rocha Goncalves                                           | Instituto Adolfo Lutz, Interdisciplinary Procedures Center, Strategic Laboratory                  | Claudio Tavares Sacchi, Claudia Regina Gonçalves, Erica Valessa Ramos Gomes, Karoline Rodrigues Campos                                                                                                                                                                                            |
| EPI_ISL_693235                                                                                                                                                                                                                                                                                                                                                                                                                                                                                                                                                                                                                                                                                                                                                                                                                                                                                                                                                                                                                                                                                                                                                                                                                                                                                                                                                                                                                                 | Casmi Centro Atendimento Saude da Mulher e Infancia                            | Instituto Adolfo Lutz, Interdisciplinary Procedures Center, Strategic Laboratory                  | Claudio Tavares Sacchi, Claudia Regina Gonçalves, Erica Valessa Ramos Gomes, Karoline Rodrigues Campos                                                                                                                                                                                            |
| EPI_ISL_693236                                                                                                                                                                                                                                                                                                                                                                                                                                                                                                                                                                                                                                                                                                                                                                                                                                                                                                                                                                                                                                                                                                                                                                                                                                                                                                                                                                                                                                 | Hospital Santa Marcelina Sao Paulo                                             | Instituto Adolfo Lutz, Interdisciplinary Procedures Center, Strategic Laboratory                  | Claudio Tavares Sacchi, Claudia Regina Gonçalves, Erica Valessa Ramos Gomes, Karoline Rodrigues Campos                                                                                                                                                                                            |
| EPI_ISL_693237                                                                                                                                                                                                                                                                                                                                                                                                                                                                                                                                                                                                                                                                                                                                                                                                                                                                                                                                                                                                                                                                                                                                                                                                                                                                                                                                                                                                                                 | UPA Santa Isabel                                                               | Instituto Adolfo Lutz, Interdisciplinary Procedures Center, Strategic Laboratory                  | Claudio Tavares Sacchi, Claudia Regina Gonçalves, Erica Valessa Ramos Gomes, Karoline Rodrigues Campos                                                                                                                                                                                            |
| EPI_ISL_693238, EPI_ISL_693239                                                                                                                                                                                                                                                                                                                                                                                                                                                                                                                                                                                                                                                                                                                                                                                                                                                                                                                                                                                                                                                                                                                                                                                                                                                                                                                                                                                                                 | Secao Centro de Diagnostico Secedi                                             | Instituto Adolfo Lutz, Interdisciplinary Procedures Center, Strategic Laboratory                  | Claudio Tavares Sacchi, Claudia Regina Gonçalves, Erica Valessa Ramos Gomes, Karoline Rodrigues Campos                                                                                                                                                                                            |
| EPI_ISL_693240                                                                                                                                                                                                                                                                                                                                                                                                                                                                                                                                                                                                                                                                                                                                                                                                                                                                                                                                                                                                                                                                                                                                                                                                                                                                                                                                                                                                                                 | Centro de Vigilância a Saude de Diadema                                        | Instituto Adolfo Lutz, Interdisciplinary Procedures Center, Strategic Laboratory                  | Claudio Tavares Sacchi, Claudia Regina Gonçalves, Erica Valessa Ramos Gomes, Karoline Rodrigues Campos                                                                                                                                                                                            |
| EPI_ISL_693241                                                                                                                                                                                                                                                                                                                                                                                                                                                                                                                                                                                                                                                                                                                                                                                                                                                                                                                                                                                                                                                                                                                                                                                                                                                                                                                                                                                                                                 | Hospital e Maternidade Sao Lucas                                               | Instituto Adolfo Lutz, Interdisciplinary Procedures Center, Strategic Laboratory                  | Claudio Tavares Sacchi, Claudia Regina Gonçalves, Erica Valessa Ramos Gomes, Karoline Rodrigues Campos                                                                                                                                                                                            |
| EPI_ISL_693242                                                                                                                                                                                                                                                                                                                                                                                                                                                                                                                                                                                                                                                                                                                                                                                                                                                                                                                                                                                                                                                                                                                                                                                                                                                                                                                                                                                                                                 | Centro de Vigilância a Saude de Diadema                                        | Instituto Adolfo Lutz, Interdisciplinary Procedures Center, Strategic Laboratory                  | Claudio Tavares Sacchi, Claudia Regina Gonçalves, Erica Valessa Ramos Gomes, Karoline Rodrigues Campos                                                                                                                                                                                            |
| EPI_ISL_693243                                                                                                                                                                                                                                                                                                                                                                                                                                                                                                                                                                                                                                                                                                                                                                                                                                                                                                                                                                                                                                                                                                                                                                                                                                                                                                                                                                                                                                 | Laboratório Municipal de Piracicaba                                            | Instituto Adolfo Lutz, Interdisciplinary Procedures Center, Strategic Laboratory                  | Claudio Tavares Sacchi, Claudia Regina Gonçalves, Erica Valessa Ramos Gomes, Karoline Rodrigues Campos                                                                                                                                                                                            |
| EPI_ISL_693244                                                                                                                                                                                                                                                                                                                                                                                                                                                                                                                                                                                                                                                                                                                                                                                                                                                                                                                                                                                                                                                                                                                                                                                                                                                                                                                                                                                                                                 | Centro Médico da Policia Militar do Estado de Sao Paulo                        | Instituto Adolfo Lutz, Interdisciplinary Procedures Center, Strategic Laboratory                  | Claudio Tavares Sacchi, Claudia Regina Gonçalves, Erica Valessa Ramos Gomes, Karoline Rodrigues Campos                                                                                                                                                                                            |
| EPI_ISL_693245                                                                                                                                                                                                                                                                                                                                                                                                                                                                                                                                                                                                                                                                                                                                                                                                                                                                                                                                                                                                                                                                                                                                                                                                                                                                                                                                                                                                                                 | UPA Santa Isabel                                                               | Instituto Adolfo Lutz, Interdisciplinary Procedures Center, Strategic Laboratory                  | Claudio Tavares Sacchi, Claudia Regina Gonçalves, Erica Valessa Ramos Gomes, Karoline Rodrigues Campos                                                                                                                                                                                            |
| EPI_ISL_693246                                                                                                                                                                                                                                                                                                                                                                                                                                                                                                                                                                                                                                                                                                                                                                                                                                                                                                                                                                                                                                                                                                                                                                                                                                                                                                                                                                                                                                 | Laboratorio Municipal de Rio Grande da Serra                                   | Instituto Adolfo Lutz, Interdisciplinary Procedures Center, Strategic Laboratory                  | Claudio Tavares Sacchi, Claudia Regina Gonçalves, Erica Valessa Ramos Gomes, Karoline Rodrigues Campos                                                                                                                                                                                            |
| EPI_ISL_693247                                                                                                                                                                                                                                                                                                                                                                                                                                                                                                                                                                                                                                                                                                                                                                                                                                                                                                                                                                                                                                                                                                                                                                                                                                                                                                                                                                                                                                 | Secao Centro de Diagnostico Secedi                                             | Instituto Adolfo Lutz, Interdisciplinary Procedures Center, Strategic Laboratory                  | Claudio Tavares Sacchi, Claudia Regina Gonçalves, Erica Valessa Ramos Gomes, Karoline Rodrigues Campos                                                                                                                                                                                            |
| EPI_ISL_693248                                                                                                                                                                                                                                                                                                                                                                                                                                                                                                                                                                                                                                                                                                                                                                                                                                                                                                                                                                                                                                                                                                                                                                                                                                                                                                                                                                                                                                 | Centro Municipal de Epidemiologia e Imunizações                                | Instituto Adolfo Lutz, Interdisciplinary Procedures Center, Strategic Laboratory                  | Claudio Tavares Sacchi, Claudia Regina Gonçalves, Erica Valessa Ramos Gomes, Karoline Rodrigues Campos                                                                                                                                                                                            |
| EPI_ISL_693269, EPI_ISL_693282, EPI_ISL_693283, EPI_ISL_693284, EPI_ISL_693285, EPI_ISL_693297                                                                                                                                                                                                                                                                                                                                                                                                                                                                                                                                                                                                                                                                                                                                                                                                                                                                                                                                                                                                                                                                                                                                                                                                                                                                                                                                                 | unknown                                                                        | Public Health Virology Laboratory, Forensic and Scientific Services (PHV-FSS)                     | Son Nguyen et al.                                                                                                                                                                                                                                                                                 |
| EPI_ISL_693298, EPI_ISL_693299                                                                                                                                                                                                                                                                                                                                                                                                                                                                                                                                                                                                                                                                                                                                                                                                                                                                                                                                                                                                                                                                                                                                                                                                                                                                                                                                                                                                                 | Department of Microbiology, Yokohama City University School of Medicine        | Department of Microbiology, Yokohama City University School of Medicine                           | Kei Miyakawa, Ryo Saji, Kazuya Sakai, Reo Matsumura, Mototsugu Nishii, Ichiro Takeuchi, Akihide Ryo                                                                                                                                                                                               |
| EPI_ISL_693302, EPI_ISL_693303, EPI_ISL_693304, EPI_ISL_693305, EPI_ISL_693306                                                                                                                                                                                                                                                                                                                                                                                                                                                                                                                                                                                                                                                                                                                                                                                                                                                                                                                                                                                                                                                                                                                                                                                                                                                                                                                                                                 | Department of Laboratory Medicine, National Taiwan University Hospital         | Microbial Genomics Core Lab, National Taiwan University Centers of Genomic and Precision Medicine | Shiou-Hwei Yeh, You-Yu Lin, Ya-Yun Lai, Chiao-Ling Li, Shan-Chwen Chang, Pei-Jer Chen, Sui-Yuan Chang                                                                                                                                                                                             |
| EPI_ISL_693307, EPI_ISL_693308, EPI_ISL_693309, EPI_ISL_693310, EPI_ISL_693311, EPI_ISL_693312, EPI_ISL_693313, EPI_ISL_693314, EPI_ISL_693315, EPI_ISL_693316, EPI_ISL_693317, EPI_ISL_693318, EPI_ISL_693319, EPI_ISL_693320, EPI_ISL_693321, EPI_ISL_693322, EPI_ISL_693323, EPI_ISL_693324, EPI_ISL_693325, EPI_ISL_693326, EPI_ISL_693327, EPI_ISL_693328, EPI_ISL_693329, EPI_ISL_693330, EPI_ISL_693331                                                                                                                                                                                                                                                                                                                                                                                                                                                                                                                                                                                                                                                                                                                                                                                                                                                                                                                                                                                                                                 |                                                                                |                                                                                                   |                                                                                                                                                                                                                                                                                                   |
| see above                                                                                                                                                                                                                                                                                                                                                                                                                                                                                                                                                                                                                                                                                                                                                                                                                                                                                                                                                                                                                                                                                                                                                                                                                                                                                                                                                                                                                                      | National Public Health Laboratory, National Centre for Infectious Diseases     | National Public Health Laboratory, National Centre for Infectious Diseases                        | Tze Minn Mak, Sophie Octavia, Zhenyang Zhou, Lin Cui, Raymond Tzer Pin Lin                                                                                                                                                                                                                        |
| EPI_ISL_693332, EPI_ISL_693333                                                                                                                                                                                                                                                                                                                                                                                                                                                                                                                                                                                                                                                                                                                                                                                                                                                                                                                                                                                                                                                                                                                                                                                                                                                                                                                                                                                                                 | Lighthouse Lab in Alderley Park                                                | Wellcome Sanger Institute for the COVID-19 Genomics UK (COG-UK) Consortium                        | Jacquelyn Wynn, Mairead Hyland, The Lighthouse Lab in Alderley Park and Alex Alderton, Roberto Amato, Sonia Goncalves, Ewan Harrison, David K. Jackson, Ian Johnston, Dominic Kwiatkowski, Cordelia Langford, John Sillitoe on behalf of the Wellcome Sanger Institute COVID-19 Surveillance Team |
| EPI_ISL_693392, EPI_ISL_693393, EPI_ISL_693394, EPI_ISL_693395, EPI_ISL_693396, EPI_ISL_693397, EPI_ISL_693398, EPI_ISL_693399, EPI_ISL_693400, EPI_ISL_693401, EPI_ISL_693402, EPI_ISL_693403, EPI_ISL_693404, EPI_ISL_693406, EPI_ISL_693407, EPI_ISL_693408, EPI_ISL_693409, EPI_ISL_693410, EPI_ISL_693411, EPI_ISL_693412, EPI_ISL_693413, EPI_ISL_693414, EPI_ISL_693415, EPI_ISL_693416, EPI_ISL_693417, EPI_ISL_693418, EPI_ISL_693419, EPI_ISL_693420, EPI_ISL_693421, EPI_ISL_693422, EPI_ISL_693423, EPI_ISL_693424, EPI_ISL_693425, EPI_ISL_693426, EPI_ISL_693427, EPI_ISL_693428, EPI_ISL_693429, EPI_ISL_693430, EPI_ISL_693431, EPI_ISL_693432, EPI_ISL_693433, EPI_ISL_693434, EPI_ISL_693435, EPI_ISL_693436, EPI_ISL_693437, EPI_ISL_693438, EPI_ISL_693439, EPI_ISL_693440, EPI_ISL_693441, EPI_ISL_693442, EPI_ISL_693443, EPI_ISL_693444, EPI_ISL_693445, EPI_ISL_693446, EPI_ISL_693447, EPI_ISL_693448, EPI_ISL_693449, EPI_ISL_693450, EPI_ISL_693451, EPI_ISL_693452, EPI_ISL_693453, EPI_ISL_693454, EPI_ISL_693455, EPI_ISL_693456, EPI_ISL_693457, EPI_ISL_693458, EPI_ISL_693459, EPI_ISL_693460, EPI_ISL_693461, EPI_ISL_693462, EPI_ISL_693463, EPI_ISL_693464, EPI_ISL_693465, EPI_ISL_693466, EPI_ISL_693467, EPI_ISL_693468, EPI_ISL_693469, EPI_ISL_693470                                                                                                                                                 |                                                                                |                                                                                                   |                                                                                                                                                                                                                                                                                                   |
| see above                                                                                                                                                                                                                                                                                                                                                                                                                                                                                                                                                                                                                                                                                                                                                                                                                                                                                                                                                                                                                                                                                                                                                                                                                                                                                                                                                                                                                                      | Respiratory Virus Unit, Microbiology Services Colindale, Public Health England | COVID-19 Genomics UK (COG-UK) Consortium                                                          | PHE Covid Sequencing Team                                                                                                                                                                                                                                                                         |
| EPI_ISL_693471, EPI_ISL_693472, EPI_ISL_693473, EPI_ISL_693474, EPI_ISL_693475, EPI_ISL_693476, EPI_ISL_693477, EPI_ISL_693478, EPI_ISL_693479, EPI_ISL_693480, EPI_ISL_693481, EPI_ISL_693482, EPI_ISL_693483                                                                                                                                                                                                                                                                                                                                                                                                                                                                                                                                                                                                                                                                                                                                                                                                                                                                                                                                                                                                                                                                                                                                                                                                                                 |                                                                                |                                                                                                   |                                                                                                                                                                                                                                                                                                   |
| see above                                                                                                                                                                                                                                                                                                                                                                                                                                                                                                                                                                                                                                                                                                                                                                                                                                                                                                                                                                                                                                                                                                                                                                                                                                                                                                                                                                                                                                      | Central Public Health Laboratory                                               | National Public Health Laboratory, National Centre for Infectious Diseases                        | Tze Minn Mak, Sophie Octavia, Zhenyang Zhou, Esorom Daoni, Theresa Palou, Lin Cui, Raymond Tzer Pin Lin                                                                                                                                                                                           |
| EPI_ISL_693484, EPI_ISL_693485, EPI_ISL_693487                                                                                                                                                                                                                                                                                                                                                                                                                                                                                                                                                                                                                                                                                                                                                                                                                                                                                                                                                                                                                                                                                                                                                                                                                                                                                                                                                                                                 | Respiratory Virus Unit, Microbiology Services Colindale, Public Health England | COVID-19 Genomics UK (COG-UK) Consortium                                                          | PHE Covid Sequencing Team                                                                                                                                                                                                                                                                         |
| EPI_ISL_693488, EPI_ISL_693489, EPI_ISL_693490, EPI_ISL_693491, EPI_ISL_693492, EPI_ISL_693493, EPI_ISL_693494, EPI_ISL_693495, EPI_ISL_693496, EPI_ISL_693497, EPI_ISL_693498, EPI_ISL_693499, EPI_ISL_693500, EPI_ISL_693501, EPI_ISL_693502, EPI_ISL_693503, EPI_ISL_693504, EPI_ISL_693505, EPI_ISL_693506, EPI_ISL_693507, EPI_ISL_693508, EPI_ISL_693509, EPI_ISL_693510, EPI_ISL_693511, EPI_ISL_693512, EPI_ISL_693513, EPI_ISL_693514                                                                                                                                                                                                                                                                                                                                                                                                                                                                                                                                                                                                                                                                                                                                                                                                                                                                                                                                                                                                 |                                                                                |                                                                                                   |                                                                                                                                                                                                                                                                                                   |
| see above                                                                                                                                                                                                                                                                                                                                                                                                                                                                                                                                                                                                                                                                                                                                                                                                                                                                                                                                                                                                                                                                                                                                                                                                                                                                                                                                                                                                                                      | CNR Virus des Infections Respiratoires - France SUD                            | CNR Virus des Infections Respiratoires - France SUD                                               | Antonin Bal, Gregory Destras, Gwendolyne Burfin, Quentin Semanas, Martine Valette, Bruno Lina, Laurence Josset                                                                                                                                                                                    |
| EPI_ISL_693516, EPI_ISL_693518, EPI_ISL_693519, EPI_ISL_693520                                                                                                                                                                                                                                                                                                                                                                                                                                                                                                                                                                                                                                                                                                                                                                                                                                                                                                                                                                                                                                                                                                                                                                                                                                                                                                                                                                                 | Hospital Vila Franca de Xira                                                   | Instituto Nacional de Saude (INSA)                                                                | Borges et al                                                                                                                                                                                                                                                                                      |
| EPI_ISL_693521                                                                                                                                                                                                                                                                                                                                                                                                                                                                                                                                                                                                                                                                                                                                                                                                                                                                                                                                                                                                                                                                                                                                                                                                                                                                                                                                                                                                                                 | Instituto Nacional de Saude (INSA)                                             | Instituto Nacional de Saude (INSA)                                                                | Borges et al                                                                                                                                                                                                                                                                                      |
| EPI_ISL_693523, EPI_ISL_693524                                                                                                                                                                                                                                                                                                                                                                                                                                                                                                                                                                                                                                                                                                                                                                                                                                                                                                                                                                                                                                                                                                                                                                                                                                                                                                                                                                                                                 | Hospital Vila Franca de Xira                                                   | Instituto Nacional de Saude (INSA)                                                                | Borges et al                                                                                                                                                                                                                                                                                      |
| EPI_ISL_693525, EPI_ISL_693527, EPI_ISL_693528, EPI_ISL_693529, EPI_ISL_693530, EPI_ISL_693531, EPI_ISL_693532, EPI_ISL_693533, EPI_ISL_693540, EPI_ISL_693541, EPI_ISL_693542, EPI_ISL_693554, EPI_ISL_693555, EPI_ISL_693556, EPI_ISL_693557, EPI_ISL_693558, EPI_ISL_693559, EPI_ISL_693560, EPI_ISL_693561, EPI_ISL_693562, EPI_ISL_693563, EPI_ISL_693564, EPI_ISL_693565, EPI_ISL_693566, EPI_ISL_693567, EPI_ISL_693568, EPI_ISL_693569, EPI_ISL_693570, EPI_ISL_693571, EPI_ISL_693572, EPI_ISL_693573, EPI_ISL_693574, EPI_ISL_693575, EPI_ISL_693576, EPI_ISL_693577, EPI_ISL_693578, EPI_ISL_693579, EPI_ISL_693580, EPI_ISL_693581, EPI_ISL_693582, EPI_ISL_693583, EPI_ISL_693584, EPI_ISL_693585, EPI_ISL_693586, EPI_ISL_693587, EPI_ISL_693588, EPI_ISL_693589, EPI_ISL_693590, EPI_ISL_693591, EPI_ISL_693592, EPI_ISL_693593, EPI_ISL_693594, EPI_ISL_693595, EPI_ISL_693596, EPI_ISL_693597, EPI_ISL_693598, EPI_ISL_693599, EPI_ISL_693600, EPI_ISL_693601, EPI_ISL_693602, EPI_ISL_693603, EPI_ISL_693604, EPI_ISL_693605, EPI_ISL_693606, EPI_ISL_693607, EPI_ISL_693608, EPI_ISL_693609, EPI_ISL_693610, EPI_ISL_693611, EPI_ISL_693612, EPI_ISL_693613, EPI_ISL_693614, EPI_ISL_693615, EPI_ISL_693616, EPI_ISL_693617, EPI_ISL_693618, EPI_ISL_693619, EPI_ISL_693620, EPI_ISL_693621, EPI_ISL_693622, EPI_ISL_693623, EPI_ISL_693624, EPI_ISL_693625, EPI_ISL_693626, EPI_ISL_693627, EPI_ISL_693628, EPI_ISL_693629 |                                                                                |                                                                                                   |                                                                                                                                                                                                                                                                                                   |
| see above                                                                                                                                                                                                                                                                                                                                                                                                                                                                                                                                                                                                                                                                                                                                                                                                                                                                                                                                                                                                                                                                                                                                                                                                                                                                                                                                                                                                                                      | Instituto Nacional de Saude (INSA)                                             | Instituto Nacional de Saude (INSA)                                                                | Borges et al                                                                                                                                                                                                                                                                                      |



|                                                                                                                                                                                                                                                                                                                                                                                                                                                                                                                                                                                                                                                                                                                                                                                                                                                                                                                                                                                                                                                                                                                                                                                                                                                                                                                                                                                                                                                                                                                                                                                                                                                                                                                                                                                                                                                                                                                                                                                                |                                                |            |                                                                                                                                                       |
|------------------------------------------------------------------------------------------------------------------------------------------------------------------------------------------------------------------------------------------------------------------------------------------------------------------------------------------------------------------------------------------------------------------------------------------------------------------------------------------------------------------------------------------------------------------------------------------------------------------------------------------------------------------------------------------------------------------------------------------------------------------------------------------------------------------------------------------------------------------------------------------------------------------------------------------------------------------------------------------------------------------------------------------------------------------------------------------------------------------------------------------------------------------------------------------------------------------------------------------------------------------------------------------------------------------------------------------------------------------------------------------------------------------------------------------------------------------------------------------------------------------------------------------------------------------------------------------------------------------------------------------------------------------------------------------------------------------------------------------------------------------------------------------------------------------------------------------------------------------------------------------------------------------------------------------------------------------------------------------------|------------------------------------------------|------------|-------------------------------------------------------------------------------------------------------------------------------------------------------|
| EPI_ISL_694866, EPI_ISL_694867, EPI_ISL_694868, EPI_ISL_694869, EPI_ISL_694870, EPI_ISL_694871, EPI_ISL_694872, EPI_ISL_694873, EPI_ISL_694874, EPI_ISL_694875, EPI_ISL_694876, EPI_ISL_694877, EPI_ISL_694878, EPI_ISL_694879, EPI_ISL_694880, EPI_ISL_694881, EPI_ISL_694882, EPI_ISL_694883, EPI_ISL_694884                                                                                                                                                                                                                                                                                                                                                                                                                                                                                                                                                                                                                                                                                                                                                                                                                                                                                                                                                                                                                                                                                                                                                                                                                                                                                                                                                                                                                                                                                                                                                                                                                                                                                 |                                                |            |                                                                                                                                                       |
| see above                                                                                                                                                                                                                                                                                                                                                                                                                                                                                                                                                                                                                                                                                                                                                                                                                                                                                                                                                                                                                                                                                                                                                                                                                                                                                                                                                                                                                                                                                                                                                                                                                                                                                                                                                                                                                                                                                                                                                                                      | TGen North                                     | TGen North | Jolene Bowers, Megan Folkerts, Chris French, Hayley Yaglom, Ashlyn Pfeiffer, Darrin Lemmer, Dave Engelthaler, The Arizona COVID Genomics Union (ACGU) |
| EPI_ISL_694885, EPI_ISL_694886, EPI_ISL_694887, EPI_ISL_694888, EPI_ISL_694889, EPI_ISL_694890, EPI_ISL_694891, EPI_ISL_694892, EPI_ISL_694893, EPI_ISL_694900, EPI_ISL_694901, EPI_ISL_694902, EPI_ISL_694903, EPI_ISL_694905, EPI_ISL_694906, EPI_ISL_694907, EPI_ISL_694908, EPI_ISL_694909, EPI_ISL_694910, EPI_ISL_694911, EPI_ISL_694912, EPI_ISL_694916, EPI_ISL_694917, EPI_ISL_694918, EPI_ISL_694919, EPI_ISL_694920, EPI_ISL_694921, EPI_ISL_694922, EPI_ISL_694923, EPI_ISL_694924, EPI_ISL_694925, EPI_ISL_694926, EPI_ISL_694927, EPI_ISL_694928, EPI_ISL_694929, EPI_ISL_694930, EPI_ISL_694931, EPI_ISL_694932, EPI_ISL_694933, EPI_ISL_694934, EPI_ISL_694935, EPI_ISL_694936, EPI_ISL_694937, EPI_ISL_694938, EPI_ISL_694939, EPI_ISL_694940, EPI_ISL_694941, EPI_ISL_694942, EPI_ISL_694943, EPI_ISL_694944, EPI_ISL_694946, EPI_ISL_694947, EPI_ISL_694948, EPI_ISL_694949, EPI_ISL_694950                                                                                                                                                                                                                                                                                                                                                                                                                                                                                                                                                                                                                                                                                                                                                                                                                                                                                                                                                                                                                                                                                 |                                                |            |                                                                                                                                                       |
| see above                                                                                                                                                                                                                                                                                                                                                                                                                                                                                                                                                                                                                                                                                                                                                                                                                                                                                                                                                                                                                                                                                                                                                                                                                                                                                                                                                                                                                                                                                                                                                                                                                                                                                                                                                                                                                                                                                                                                                                                      | AZ SPHL, Arizona Department of Health Services | TGen North | Jolene Bowers, Megan Folkerts, Chris French, Hayley Yaglom, Ashlyn Pfeiffer, Darrin Lemmer, Dave Engelthaler, The Arizona COVID Genomics Union (ACGU) |
| EPI_ISL_694951, EPI_ISL_694953, EPI_ISL_694956, EPI_ISL_694957, EPI_ISL_694959, EPI_ISL_694960, EPI_ISL_694961, EPI_ISL_694962, EPI_ISL_694963, EPI_ISL_694964, EPI_ISL_694965, EPI_ISL_694966, EPI_ISL_694969, EPI_ISL_694970, EPI_ISL_694971, EPI_ISL_694972, EPI_ISL_694973, EPI_ISL_694974, EPI_ISL_694975, EPI_ISL_694976, EPI_ISL_694977, EPI_ISL_694978, EPI_ISL_694980, EPI_ISL_694981, EPI_ISL_694982, EPI_ISL_694983, EPI_ISL_694984, EPI_ISL_694987, EPI_ISL_694988, EPI_ISL_694989, EPI_ISL_694991, EPI_ISL_694994, EPI_ISL_694995, EPI_ISL_694996, EPI_ISL_694997, EPI_ISL_694998, EPI_ISL_694999, EPI_ISL_695000, EPI_ISL_695001, EPI_ISL_695002, EPI_ISL_695003, EPI_ISL_695004, EPI_ISL_695005, EPI_ISL_695006, EPI_ISL_695007, EPI_ISL_695009, EPI_ISL_695011, EPI_ISL_695012, EPI_ISL_695013, EPI_ISL_695014, EPI_ISL_695015, EPI_ISL_695017, EPI_ISL_695018, EPI_ISL_695019, EPI_ISL_695020, EPI_ISL_695021, EPI_ISL_695022, EPI_ISL_695024, EPI_ISL_695025, EPI_ISL_695026, EPI_ISL_695027, EPI_ISL_695028, EPI_ISL_695029, EPI_ISL_695030, EPI_ISL_695031, EPI_ISL_695032, EPI_ISL_695033, EPI_ISL_695034, EPI_ISL_695035, EPI_ISL_695036, EPI_ISL_695037, EPI_ISL_695039, EPI_ISL_695041, EPI_ISL_695042, EPI_ISL_695043, EPI_ISL_695045, EPI_ISL_695047, EPI_ISL_695049, EPI_ISL_695050, EPI_ISL_695051, EPI_ISL_695053, EPI_ISL_695054, EPI_ISL_695055, EPI_ISL_695056, EPI_ISL_695057, EPI_ISL_695061, EPI_ISL_695062, EPI_ISL_695063, EPI_ISL_695064, EPI_ISL_695065, EPI_ISL_695066, EPI_ISL_695068, EPI_ISL_695069, EPI_ISL_695071, EPI_ISL_695072, EPI_ISL_695073, EPI_ISL_695074, EPI_ISL_695075, EPI_ISL_695076, EPI_ISL_695077, EPI_ISL_695078, EPI_ISL_695080, EPI_ISL_695081, EPI_ISL_695082, EPI_ISL_695083, EPI_ISL_695084, EPI_ISL_695085, EPI_ISL_695086, EPI_ISL_695087, EPI_ISL_695088, EPI_ISL_695089, EPI_ISL_695091, EPI_ISL_695092, EPI_ISL_695093, EPI_ISL_695095, EPI_ISL_695096, EPI_ISL_695097, EPI_ISL_695099, EPI_ISL_695100, EPI_ISL_695102 |                                                |            |                                                                                                                                                       |
| see above                                                                                                                                                                                                                                                                                                                                                                                                                                                                                                                                                                                                                                                                                                                                                                                                                                                                                                                                                                                                                                                                                                                                                                                                                                                                                                                                                                                                                                                                                                                                                                                                                                                                                                                                                                                                                                                                                                                                                                                      | TGen North                                     | TGen North | Jolene Bowers, Megan Folkerts, Chris French, Hayley Yaglom, Ashlyn Pfeiffer, Darrin Lemmer, Dave Engelthaler, The Arizona COVID Genomics Union (ACGU) |
| EPI_ISL_695103, EPI_ISL_695104, EPI_ISL_695105, EPI_ISL_695106, EPI_ISL_695107, EPI_ISL_695108, EPI_ISL_695109, EPI_ISL_695110, EPI_ISL_695111, EPI_ISL_695112, EPI_ISL_695113, EPI_ISL_695114, EPI_ISL_695115, EPI_ISL_695116, EPI_ISL_695117, EPI_ISL_695118, EPI_ISL_695119, EPI_ISL_695120, EPI_ISL_695121, EPI_ISL_695122, EPI_ISL_695124, EPI_ISL_695126, EPI_ISL_695127, EPI_ISL_695128, EPI_ISL_695129, EPI_ISL_695130, EPI_ISL_695131, EPI_ISL_695132, EPI_ISL_695133, EPI_ISL_695134, EPI_ISL_695135, EPI_ISL_695136, EPI_ISL_695137, EPI_ISL_695138, EPI_ISL_695139, EPI_ISL_695140, EPI_ISL_695143, EPI_ISL_695144, EPI_ISL_695145, EPI_ISL_695146, EPI_ISL_695147, EPI_ISL_695148, EPI_ISL_695149, EPI_ISL_695150, EPI_ISL_695151, EPI_ISL_695152, EPI_ISL_695153, EPI_ISL_695154, EPI_ISL_695155, EPI_ISL_695156, EPI_ISL_695157, EPI_ISL_695158, EPI_ISL_695159, EPI_ISL_695160, EPI_ISL_695161, EPI_ISL_695162, EPI_ISL_695163, EPI_ISL_695164, EPI_ISL_695165, EPI_ISL_695166, EPI_ISL_695167, EPI_ISL_695168, EPI_ISL_695169, EPI_ISL_695170, EPI_ISL_695171, EPI_ISL_695172, EPI_ISL_695173, EPI_ISL_695176, EPI_ISL_695177, EPI_ISL_695178, EPI_ISL_695181, EPI_ISL_695184, EPI_ISL_695185, EPI_ISL_695186, EPI_ISL_695189, EPI_ISL_695190, EPI_ISL_695191, EPI_ISL_695192, EPI_ISL_695193, EPI_ISL_695194, EPI_ISL_695198, EPI_ISL_695202, EPI_ISL_695203, EPI_ISL_695205, EPI_ISL_695206, EPI_ISL_695207, EPI_ISL_695209, EPI_ISL_695211, EPI_ISL_695212, EPI_ISL_695214, EPI_ISL_695215, EPI_ISL_695220, EPI_ISL_695221, EPI_ISL_695222, EPI_ISL_695223, EPI_ISL_695224, EPI_ISL_695225, EPI_ISL_695226, EPI_ISL_695228                                                                                                                                                                                                                                                                                                                                                 |                                                |            |                                                                                                                                                       |
| see above                                                                                                                                                                                                                                                                                                                                                                                                                                                                                                                                                                                                                                                                                                                                                                                                                                                                                                                                                                                                                                                                                                                                                                                                                                                                                                                                                                                                                                                                                                                                                                                                                                                                                                                                                                                                                                                                                                                                                                                      | AZ SPHL, Arizona Department of Health Services | TGen North | Jolene Bowers, Megan Folkerts, Chris French, Hayley Yaglom, Ashlyn Pfeiffer, Darrin Lemmer, Dave Engelthaler, The Arizona COVID Genomics Union (ACGU) |
| EPI_ISL_695230, EPI_ISL_695231, EPI_ISL_695232, EPI_ISL_695233, EPI_ISL_695235, EPI_ISL_695236, EPI_ISL_695237, EPI_ISL_695238, EPI_ISL_695239, EPI_ISL_695240, EPI_ISL_695241, EPI_ISL_695242, EPI_ISL_695243, EPI_ISL_695244, EPI_ISL_695245, EPI_ISL_695246, E                                                                                                                                                                                                                                                                                                                                                                                                                                                                                                                                                                                                                                                                                                                                                                                                                                                                                                                                                                                                                                                                                                                                                                                                                                                                                                                                                                                                                                                                                                                                                                                                                                                                                                                              |                                                |            |                                                                                                                                                       |

[illegible]

[illegible]
