# Supplementary material for: Deepening of In Silico Evaluation of SARS-CoV-2 Detection RT-qPCR Assays in the Context of New Variants
Source: MDPI journal article supplement (doi:10.3390/genes12040565), 2021-04-13
Supplement: s1 [file s1]

We gratefully acknowledge the following Authors from the Originating laboratories responsible for obtaining the specimens, as well as the Submitting laboratories where the genome data were generated and shared via GISAID, on which this research is based.

All Submitters of data may be contacted directly via [www.gisaid.org](http://www.gisaid.org)

Authors are sorted alphabetically.

| Accession ID                                                                                                                                                                                                                                                                                                                                                                                                                                                                                                                                                                                                                                                                                                   | Originating Laboratory | Submitting Laboratory                                        | Authors                                                                                                                                                                                                                                                                                                                                                                                                                                                                  |
|----------------------------------------------------------------------------------------------------------------------------------------------------------------------------------------------------------------------------------------------------------------------------------------------------------------------------------------------------------------------------------------------------------------------------------------------------------------------------------------------------------------------------------------------------------------------------------------------------------------------------------------------------------------------------------------------------------------|------------------------|--------------------------------------------------------------|--------------------------------------------------------------------------------------------------------------------------------------------------------------------------------------------------------------------------------------------------------------------------------------------------------------------------------------------------------------------------------------------------------------------------------------------------------------------------|
| EPI_ISL_737603, EPI_ISL_737604, EPI_ISL_737605, EPI_ISL_737606                                                                                                                                                                                                                                                                                                                                                                                                                                                                                                                                                                                                                                                 | Viollier AG            | Department of Biosystems Science and Engineering, ETH Zürich | Chaoran Chen, Sarah Nadeau, Catharine Aquino, Ivan Topolsky, Philipp Jablonski, Lara Fuhrmann, David Dreifuss, Katharina Jahn, Andreia Cabral de Gouvea, Maria Domenica Moccia, Simon Grüter, Timothy Sykes, Lennart Opitz, Griffin White, Laura Neff, Doris Popovic, Andrea Patrignani, Jay Tracy, Ralph Schlapbach, Christiane Beckmann, Maurice Redondo, Olivier Kobel, Christoph Noppen, Sophie Seidel, Noemie Santamaria de Souza, Niko Beerenwinkel, Tanja Stadler |
| EPI_ISL_737607, EPI_ISL_737608                                                                                                                                                                                                                                                                                                                                                                                                                                                                                                                                                                                                                                                                                 | Viollier AG            | Department of Biosystems Science and Engineering, ETH Zürich | Chaoran Chen, Sarah Nadeau, Ivan Topolsky, Emmanouil Dermitzakis, Keith Harshman, Ioannis Xenarios, Henri Pegeot, Lorenzo Cerutti, Deborah Penet, Philipp Jablonski, Lara Fuhrmann, David Dreifuss, Katharina Jahn, Christiane Beckmann, Maurice Redondo, Olivier Kobel, Christoph Noppen, Sophie Seidel, Noemie Santamaria de Souza, Niko Beerenwinkel, Tanja Stadler                                                                                                   |
| EPI_ISL_737609, EPI_ISL_737625, EPI_ISL_737626, EPI_ISL_737627                                                                                                                                                                                                                                                                                                                                                                                                                                                                                                                                                                                                                                                 | Viollier AG            | Department of Biosystems Science and Engineering, ETH Zürich | Chaoran Chen, Sarah Nadeau, Catharine Aquino, Ivan Topolsky, Philipp Jablonski, Lara Fuhrmann, David Dreifuss, Katharina Jahn, Andreia Cabral de Gouvea, Maria Domenica Moccia, Simon Grüter, Timothy Sykes, Lennart Opitz, Griffin White, Laura Neff, Doris Popovic, Andrea Patrignani, Jay Tracy, Ralph Schlapbach, Christiane Beckmann, Maurice Redondo, Olivier Kobel, Christoph Noppen, Sophie Seidel, Noemie Santamaria de Souza, Niko Beerenwinkel, Tanja Stadler |
| EPI_ISL_737628                                                                                                                                                                                                                                                                                                                                                                                                                                                                                                                                                                                                                                                                                                 | Viollier AG            | Department of Biosystems Science and Engineering, ETH Zürich | Chaoran Chen, Sarah Nadeau, Ivan Topolsky, Emmanouil Dermitzakis, Keith Harshman, Ioannis Xenarios, Henri Pegeot, Lorenzo Cerutti, Deborah Penet, Philipp Jablonski, Lara Fuhrmann, David Dreifuss, Katharina Jahn, Christiane Beckmann, Maurice Redondo, Olivier Kobel, Christoph Noppen, Sophie Seidel, Noemie Santamaria de Souza, Niko Beerenwinkel, Tanja Stadler                                                                                                   |
| EPI_ISL_737629, EPI_ISL_737630, EPI_ISL_737631, EPI_ISL_737632, EPI_ISL_737633, EPI_ISL_737634, EPI_ISL_737635, EPI_ISL_737636, EPI_ISL_737637, EPI_ISL_737638, EPI_ISL_737639, EPI_ISL_737640, EPI_ISL_737641, EPI_ISL_737642                                                                                                                                                                                                                                                                                                                                                                                                                                                                                 | Viollier AG            | Department of Biosystems Science and Engineering, ETH Zürich | Chaoran Chen, Sarah Nadeau, Catharine Aquino, Ivan Topolsky, Philipp Jablonski, Lara Fuhrmann, David Dreifuss, Katharina Jahn, Andreia Cabral de Gouvea, Maria Domenica Moccia, Simon Grüter, Timothy Sykes, Lennart Opitz, Griffin White, Laura Neff, Doris Popovic, Andrea Patrignani, Jay Tracy, Ralph Schlapbach, Christiane Beckmann, Maurice Redondo, Olivier Kobel, Christoph Noppen, Sophie Seidel, Noemie Santamaria de Souza, Niko Beerenwinkel, Tanja Stadler |
| EPI_ISL_737643                                                                                                                                                                                                                                                                                                                                                                                                                                                                                                                                                                                                                                                                                                 | Viollier AG            | Department of Biosystems Science and Engineering, ETH Zürich | Chaoran Chen, Sarah Nadeau, Ivan Topolsky, Emmanouil Dermitzakis, Keith Harshman, Ioannis Xenarios, Henri Pegeot, Lorenzo Cerutti, Deborah Penet, Philipp Jablonski, Lara Fuhrmann, David Dreifuss, Katharina Jahn, Christiane Beckmann, Maurice Redondo, Olivier Kobel, Christoph Noppen, Sophie Seidel, Noemie Santamaria de Souza, Niko Beerenwinkel, Tanja Stadler                                                                                                   |
| EPI_ISL_737644, EPI_ISL_737645, EPI_ISL_737646, EPI_ISL_737647, EPI_ISL_737648, EPI_ISL_737649, EPI_ISL_737650, EPI_ISL_737651, EPI_ISL_737652, EPI_ISL_737653, EPI_ISL_737654, EPI_ISL_737655, EPI_ISL_737656, EPI_ISL_737657, EPI_ISL_737658, EPI_ISL_737659, EPI_ISL_737660, EPI_ISL_737661, EPI_ISL_737662, EPI_ISL_737663, EPI_ISL_737664, EPI_ISL_737665, EPI_ISL_737666, EPI_ISL_737667, EPI_ISL_737668, EPI_ISL_737669, EPI_ISL_737670, EPI_ISL_737671, EPI_ISL_737672, EPI_ISL_737673, EPI_ISL_737674, EPI_ISL_737675, EPI_ISL_737676, EPI_ISL_737677, EPI_ISL_737678, EPI_ISL_737679, EPI_ISL_737680, EPI_ISL_737681                                                                                 | Viollier AG            | Department of Biosystems Science and Engineering, ETH Zürich | Chaoran Chen, Sarah Nadeau, Catharine Aquino, Ivan Topolsky, Philipp Jablonski, Lara Fuhrmann, David Dreifuss, Katharina Jahn, Andreia Cabral de Gouvea, Maria Domenica Moccia, Simon Grüter, Timothy Sykes, Lennart Opitz, Griffin White, Laura Neff, Doris Popovic, Andrea Patrignani, Jay Tracy, Ralph Schlapbach, Christiane Beckmann, Maurice Redondo, Olivier Kobel, Christoph Noppen, Sophie Seidel, Noemie Santamaria de Souza, Niko Beerenwinkel, Tanja Stadler |
| EPI_ISL_737682, EPI_ISL_737683, EPI_ISL_737684, EPI_ISL_737685, EPI_ISL_737686, EPI_ISL_737687, EPI_ISL_737688, EPI_ISL_737689, EPI_ISL_737690, EPI_ISL_737691, EPI_ISL_737692, EPI_ISL_737693, EPI_ISL_737694, EPI_ISL_737695, EPI_ISL_737696, EPI_ISL_737697, EPI_ISL_737698, EPI_ISL_737699, EPI_ISL_737700, EPI_ISL_737701, EPI_ISL_737702, EPI_ISL_737703, EPI_ISL_737704, EPI_ISL_737705, EPI_ISL_737706, EPI_ISL_737707                                                                                                                                                                                                                                                                                 | Viollier AG            | Department of Biosystems Science and Engineering, ETH Zürich | Chaoran Chen, Sarah Nadeau, Ivan Topolsky, Emmanouil Dermitzakis, Keith Harshman, Ioannis Xenarios, Henri Pegeot, Lorenzo Cerutti, Deborah Penet, Philipp Jablonski, Lara Fuhrmann, David Dreifuss, Katharina Jahn, Christiane Beckmann, Maurice Redondo, Olivier Kobel, Christoph Noppen, Sophie Seidel, Noemie Santamaria de Souza, Niko Beerenwinkel, Tanja Stadler                                                                                                   |
| EPI_ISL_737708, EPI_ISL_737709, EPI_ISL_737710, EPI_ISL_737711, EPI_ISL_737712, EPI_ISL_737713, EPI_ISL_737714, EPI_ISL_737715, EPI_ISL_737716, EPI_ISL_737717, EPI_ISL_737718, EPI_ISL_737719, EPI_ISL_737720, EPI_ISL_737721, EPI_ISL_737722, EPI_ISL_737723, EPI_ISL_737724, EPI_ISL_737725, EPI_ISL_737726, EPI_ISL_737727, EPI_ISL_737728, EPI_ISL_737729, EPI_ISL_737730, EPI_ISL_737731, EPI_ISL_737732, EPI_ISL_737733, EPI_ISL_737734, EPI_ISL_737735, EPI_ISL_737736, EPI_ISL_737737, EPI_ISL_737738, EPI_ISL_737739, EPI_ISL_737740, EPI_ISL_737741, EPI_ISL_737742, EPI_ISL_737743, EPI_ISL_737744, EPI_ISL_737745, EPI_ISL_737746, EPI_ISL_737747, EPI_ISL_737748, EPI_ISL_737749, EPI_ISL_737750 | Viollier AG            | Department of Biosystems Science and Engineering, ETH Zürich | Chaoran Chen, Sarah Nadeau, Catharine Aquino, Ivan Topolsky, Philipp Jablonski, Lara Fuhrmann, David Dreifuss, Katharina Jahn, Andreia Cabral de Gouvea, Maria Domenica Moccia, Simon Grüter, Timothy Sykes, Lennart Opitz, Griffin White, Laura Neff, Doris Popovic, Andrea Patrignani, Jay Tracy, Ralph Schlapbach, Christiane Beckmann, Maurice Redondo, Olivier Kobel, Christoph Noppen, Sophie Seidel, Noemie Santamaria de Souza, Niko Beerenwinkel, Tanja Stadler |
| EPI_ISL_737751, EPI_ISL_737752, EPI_ISL_737753, EPI_ISL_737754, EPI_ISL_737755, EPI_ISL_737756, EPI_ISL_737757                                                                                                                                                                                                                                                                                                                                                                                                                                                                                                                                                                                                 | Viollier AG            | Department of Biosystems Science and Engineering, ETH Zürich | Chaoran Chen, Sarah Nadeau, Ivan Topolsky, Emmanouil Dermitzakis, Keith Harshman, Ioannis Xenarios, Henri Pegeot, Lorenzo Cerutti, Deborah Penet, Philipp Jablonski, Lara Fuhrmann, David Dreifuss, Katharina Jahn, Christiane Beckmann, Maurice Redondo, Olivier Kobel, Christoph Noppen, Sophie Seidel, Noemie Santamaria de Souza, Niko Beerenwinkel, Tanja Stadler                                                                                                   |
| EPI_ISL_737758, EPI_ISL_737759, EPI_ISL_737760, EPI_ISL_737761, EPI_ISL_737762                                                                                                                                                                                                                                                                                                                                                                                                                                                                                                                                                                                                                                 | Viollier AG            | Department of Biosystems Science and Engineering, ETH Zürich | Chaoran Chen, Sarah Nadeau, Catharine Aquino, Ivan Topolsky, Philipp Jablonski, Lara Fuhrmann, David Dreifuss, Katharina Jahn, Andreia Cabral de Gouvea, Maria Domenica Moccia, Simon Grüter, Timothy Sykes, Lennart Opitz, Griffin White, Laura Neff, Doris Popovic, Andrea Patrignani, Jay Tracy, Ralph Schlapbach, Christiane Beckmann, Maurice Redondo, Olivier Kobel, Christoph Noppen, Sophie Seidel, Noemie Santamaria de Souza, Niko Beerenwinkel, Tanja Stadler |
| EPI_ISL_737763, EPI_ISL_737764                                                                                                                                                                                                                                                                                                                                                                                                                                                                                                                                                                                                                                                                                 | Viollier AG            | Department of Biosystems Science and Engineering, ETH Zürich | Chaoran Chen, Sarah Nadeau, Ivan Topolsky, Emmanouil Dermitzakis, Keith Harshman, Ioannis Xenarios, Henri Pegeot, Lorenzo Cerutti, Deborah Penet, Philipp Jablonski, Lara Fuhrmann, David Dreifuss, Katharina Jahn, Christiane Beckmann, Maurice Redondo, Olivier Kobel, Christoph Noppen, Sophie Seidel, Noemie Santamaria de Souza, Niko Beerenwinkel, Tanja Stadler                                                                                                   |
| EPI_ISL_737765, EPI_ISL_737766, EPI_ISL_737767, EPI_ISL_737768, EPI_ISL_737769, EPI_ISL_737770, EPI_ISL_737771, EPI_ISL_737772, EPI_ISL_737773, EPI_ISL_737774, EPI_ISL_737775, EPI_ISL_737776, EPI_ISL_737777, EPI_ISL_737778, EPI_ISL_737779, EPI_ISL_737780, EPI_ISL_737781, EPI_ISL_737782, EPI_ISL_737783                                                                                                                                                                                                                                                                                                                                                                                                 | Viollier AG            | Department of Biosystems Science and Engineering, ETH Zürich | Chaoran Chen, Sarah Nadeau, Catharine Aquino, Ivan Topolsky, Philipp Jablonski, Lara Fuhrmann, David Dreifuss, Katharina Jahn, Andreia Cabral de Gouvea, Maria Domenica Moccia, Simon Grüter, Timothy Sykes, Lennart Opitz, Griffin White, Laura Neff, Doris Popovic, Andrea Patrignani, Jay Tracy, Ralph Schlapbach, Christiane Beckmann, Maurice Redondo, Olivier Kobel, Christoph Noppen, Sophie Seidel, Noemie Santamaria de Souza, Niko Beerenwinkel, Tanja Stadler |
| EPI_ISL_737784                                                                                                                                                                                                                                                                                                                                                                                                                                                                                                                                                                                                                                                                                                 | Viollier AG            | Department of Biosystems Science and Engineering, ETH Zürich | Chaoran Chen, Sarah Nadeau, Ivan Topolsky, Emmanouil Dermitzakis, Keith Harshman, Ioannis Xenarios, Henri Pegeot, Lorenzo Cerutti, Deborah Penet, Philipp Jablonski, Lara Fuhrmann, David Dreifuss, Katharina Jahn, Christiane Beckmann, Maurice Redondo, Olivier Kobel, Christoph Noppen, Sophie Seidel, Noemie Santamaria de Souza, Niko Beerenwinkel, Tanja Stadler                                                                                                   |
| EPI_ISL_737785, EPI_ISL_737786, EPI_ISL_737787, EPI_ISL_737788, EPI_ISL_737789, EPI_ISL_737790, EPI_ISL_737791, EPI_ISL_737792, EPI_ISL_737793, EPI_ISL_737794, EPI_ISL_737795, EPI_ISL_737796, EPI_ISL_737797, EPI_ISL_737798, EPI_ISL_737799, EPI_ISL_737800, EPI_ISL_737801, EPI_ISL_737802, EPI_ISL_737803, EPI_ISL_737804, EPI_ISL_737805, EPI_ISL_737806, EPI_ISL_737807, EPI_ISL_737808, EPI_ISL_737809, EPI_ISL_737810, EPI_ISL_737811, EPI_ISL_737812, EPI_ISL_737813, EPI_ISL_737814, EPI_ISL_737815, EPI_ISL_737816, EPI_ISL_737817, EPI_ISL_737818, EPI_ISL_737819, EPI_ISL_737820, EPI_ISL_737821                                                                                                 | Viollier AG            | Department of Biosystems Science and Engineering, ETH Zürich | Chaoran Chen, Sarah Nadeau, Catharine Aquino, Ivan Topolsky, Philipp Jablonski, Lara Fuhrmann, David Dreifuss, Katharina Jahn, Andreia Cabral de                                                                                                                                                                                                                                                                                                                         |

|                                                                                                                                                                                                                                                                                                                                                                                                                                                                                                                                                                                                                                                                                                                                                                                                                                                                                                                                                                                                                                                                                                                                                                                                                                                                                                                |                                                                                                                                        |                                                                                                                                        |                                                                                                                                                                                                                                                                                                                         |                                                                                                                                                                                                                                                                                                                                                                                                                                                                          |
|----------------------------------------------------------------------------------------------------------------------------------------------------------------------------------------------------------------------------------------------------------------------------------------------------------------------------------------------------------------------------------------------------------------------------------------------------------------------------------------------------------------------------------------------------------------------------------------------------------------------------------------------------------------------------------------------------------------------------------------------------------------------------------------------------------------------------------------------------------------------------------------------------------------------------------------------------------------------------------------------------------------------------------------------------------------------------------------------------------------------------------------------------------------------------------------------------------------------------------------------------------------------------------------------------------------|----------------------------------------------------------------------------------------------------------------------------------------|----------------------------------------------------------------------------------------------------------------------------------------|-------------------------------------------------------------------------------------------------------------------------------------------------------------------------------------------------------------------------------------------------------------------------------------------------------------------------|--------------------------------------------------------------------------------------------------------------------------------------------------------------------------------------------------------------------------------------------------------------------------------------------------------------------------------------------------------------------------------------------------------------------------------------------------------------------------|
|                                                                                                                                                                                                                                                                                                                                                                                                                                                                                                                                                                                                                                                                                                                                                                                                                                                                                                                                                                                                                                                                                                                                                                                                                                                                                                                |                                                                                                                                        | Zürich                                                                                                                                 | Gouvea, Maria Domenica Moccia, Simon Grüter, Timothy Sykes, Lennart Opitz, Griffin White, Laura Neff, Doris Popovic, Andrea Patrignani, Jay Tracy, Ralph Schlapbach, Christiane Beckmann, Maurice Redondo, Olivier Kobel, Christoph Noppen, Sophie Seidel, Noemie Santamaria de Souza, Niko Beerenwinkel, Tanja Stadler |                                                                                                                                                                                                                                                                                                                                                                                                                                                                          |
| EPI_ISL_737822, EPI_ISL_737823, EPI_ISL_737824, EPI_ISL_737825, EPI_ISL_737826, EPI_ISL_737827, EPI_ISL_737828, EPI_ISL_737829, EPI_ISL_737830, EPI_ISL_737831, EPI_ISL_737832, EPI_ISL_737833, EPI_ISL_737834, EPI_ISL_737835, EPI_ISL_737836, EPI_ISL_737837, EPI_ISL_737838, EPI_ISL_737839                                                                                                                                                                                                                                                                                                                                                                                                                                                                                                                                                                                                                                                                                                                                                                                                                                                                                                                                                                                                                 | see above                                                                                                                              | Viollier AG                                                                                                                            | Department of Biosystems Science and Engineering, ETH Zürich                                                                                                                                                                                                                                                            | Chaoran Chen, Sarah Nadeau, Ivan Topolsky, Emmanouil Dermitzakis, Keith Harshman, Ioannis Xenarios, Henri Pegeot, Lorenzo Cerutti, Deborah Penet, Philipp Jablonski, Lara Fuhrmann, David Dreifuss, Katharina Jahn, Christiane Beckmann, Maurice Redondo, Olivier Kobel, Christoph Noppen, Sophie Seidel, Noemie Santamaria de Souza, Niko Beerenwinkel, Tanja Stadler                                                                                                   |
| EPI_ISL_737840, EPI_ISL_737841, EPI_ISL_737842, EPI_ISL_737843, EPI_ISL_737844, EPI_ISL_737845, EPI_ISL_737846, EPI_ISL_737847, EPI_ISL_737848, EPI_ISL_737849, EPI_ISL_737850, EPI_ISL_737851, EPI_ISL_737852, EPI_ISL_737853, EPI_ISL_737854, EPI_ISL_737855, EPI_ISL_737856, EPI_ISL_737857, EPI_ISL_737858, EPI_ISL_737859, EPI_ISL_737860, EPI_ISL_737861, EPI_ISL_737862, EPI_ISL_737863, EPI_ISL_737864, EPI_ISL_737865, EPI_ISL_737866, EPI_ISL_737867, EPI_ISL_737868, EPI_ISL_737869, EPI_ISL_737870, EPI_ISL_737871, EPI_ISL_737872, EPI_ISL_737873, EPI_ISL_737874, EPI_ISL_737875, EPI_ISL_737876, EPI_ISL_737877, EPI_ISL_737878                                                                                                                                                                                                                                                                                                                                                                                                                                                                                                                                                                                                                                                                 | see above                                                                                                                              | Viollier AG                                                                                                                            | Department of Biosystems Science and Engineering, ETH Zürich                                                                                                                                                                                                                                                            | Chaoran Chen, Sarah Nadeau, Catharine Aquino, Ivan Topolsky, Philipp Jablonski, Lara Fuhrmann, David Dreifuss, Katharina Jahn, Andreia Cabral de Gouvea, Maria Domenica Moccia, Simon Grüter, Timothy Sykes, Lennart Opitz, Griffin White, Laura Neff, Doris Popovic, Andrea Patrignani, Jay Tracy, Ralph Schlapbach, Christiane Beckmann, Maurice Redondo, Olivier Kobel, Christoph Noppen, Sophie Seidel, Noemie Santamaria de Souza, Niko Beerenwinkel, Tanja Stadler |
| EPI_ISL_737879, EPI_ISL_737880, EPI_ISL_737881, EPI_ISL_737882, EPI_ISL_737883, EPI_ISL_737884, EPI_ISL_737885, EPI_ISL_737886, EPI_ISL_737887, EPI_ISL_737888, EPI_ISL_737889, EPI_ISL_737890, EPI_ISL_737891, EPI_ISL_737892, EPI_ISL_737893, EPI_ISL_737894, EPI_ISL_737895, EPI_ISL_737896, EPI_ISL_737897, EPI_ISL_737898, EPI_ISL_737899                                                                                                                                                                                                                                                                                                                                                                                                                                                                                                                                                                                                                                                                                                                                                                                                                                                                                                                                                                 | see above                                                                                                                              | Viollier AG                                                                                                                            | Department of Biosystems Science and Engineering, ETH Zürich                                                                                                                                                                                                                                                            | Chaoran Chen, Sarah Nadeau, Ivan Topolsky, Emmanouil Dermitzakis, Keith Harshman, Ioannis Xenarios, Henri Pegeot, Lorenzo Cerutti, Deborah Penet, Philipp Jablonski, Lara Fuhrmann, David Dreifuss, Katharina Jahn, Christiane Beckmann, Maurice Redondo, Olivier Kobel, Christoph Noppen, Sophie Seidel, Noemie Santamaria de Souza, Niko Beerenwinkel, Tanja Stadler                                                                                                   |
| EPI_ISL_737901, EPI_ISL_737902, EPI_ISL_737903, EPI_ISL_737904, EPI_ISL_737905, EPI_ISL_737906, EPI_ISL_737907, EPI_ISL_737908, EPI_ISL_737909, EPI_ISL_737910, EPI_ISL_737911, EPI_ISL_737912, EPI_ISL_737913, EPI_ISL_737914, EPI_ISL_737915, EPI_ISL_737916, EPI_ISL_737917, EPI_ISL_737918, EPI_ISL_737919, EPI_ISL_737920, EPI_ISL_737921, EPI_ISL_737922, EPI_ISL_737923, EPI_ISL_737924, EPI_ISL_737925, EPI_ISL_737926, EPI_ISL_737927, EPI_ISL_737928, EPI_ISL_737929                                                                                                                                                                                                                                                                                                                                                                                                                                                                                                                                                                                                                                                                                                                                                                                                                                 | see above                                                                                                                              | Viollier AG                                                                                                                            | Department of Biosystems Science and Engineering, ETH Zürich                                                                                                                                                                                                                                                            | Chaoran Chen, Sarah Nadeau, Catharine Aquino, Ivan Topolsky, Philipp Jablonski, Lara Fuhrmann, David Dreifuss, Katharina Jahn, Andreia Cabral de Gouvea, Maria Domenica Moccia, Simon Grüter, Timothy Sykes, Lennart Opitz, Griffin White, Laura Neff, Doris Popovic, Andrea Patrignani, Jay Tracy, Ralph Schlapbach, Christiane Beckmann, Maurice Redondo, Olivier Kobel, Christoph Noppen, Sophie Seidel, Noemie Santamaria de Souza, Niko Beerenwinkel, Tanja Stadler |
| EPI_ISL_737930                                                                                                                                                                                                                                                                                                                                                                                                                                                                                                                                                                                                                                                                                                                                                                                                                                                                                                                                                                                                                                                                                                                                                                                                                                                                                                 | Hospital Universitario 12 de Octubre                                                                                                   | Hospital Universitario 12 de Octubre                                                                                                   | Raul Recio, Esther Viedma, Sara González, Irene Muñoz-Gallego, Mª Dolores Folgueira, Rafael Delgado                                                                                                                                                                                                                     |                                                                                                                                                                                                                                                                                                                                                                                                                                                                          |
| EPI_ISL_737931, EPI_ISL_737939, EPI_ISL_737940, EPI_ISL_737941, EPI_ISL_737942, EPI_ISL_737943, EPI_ISL_737944, EPI_ISL_737945, EPI_ISL_737965, EPI_ISL_737971, EPI_ISL_737972, EPI_ISL_737973, EPI_ISL_737974, EPI_ISL_737975, EPI_ISL_737976, EPI_ISL_737977, EPI_ISL_737978, EPI_ISL_737979, EPI_ISL_737980, EPI_ISL_737981, EPI_ISL_737982, EPI_ISL_737983, EPI_ISL_737985, EPI_ISL_737986, EPI_ISL_737987, EPI_ISL_737988, EPI_ISL_737989, EPI_ISL_737990, EPI_ISL_737991, EPI_ISL_737992, EPI_ISL_737993, EPI_ISL_737994, EPI_ISL_737995, EPI_ISL_737997, EPI_ISL_737998, EPI_ISL_737999, EPI_ISL_738000, EPI_ISL_738001, EPI_ISL_738002, EPI_ISL_738003, EPI_ISL_738004, EPI_ISL_738005, EPI_ISL_738006, EPI_ISL_738007, EPI_ISL_738008, EPI_ISL_738009, EPI_ISL_738010, EPI_ISL_738011, EPI_ISL_738012, EPI_ISL_738013, EPI_ISL_738014, EPI_ISL_738015, EPI_ISL_738016, EPI_ISL_738017, EPI_ISL_738018, EPI_ISL_738019, EPI_ISL_738020, EPI_ISL_738021, EPI_ISL_738022, EPI_ISL_738023, EPI_ISL_738025, EPI_ISL_738026, EPI_ISL_738027, EPI_ISL_738028, EPI_ISL_738029, EPI_ISL_738030, EPI_ISL_738031, EPI_ISL_738032, EPI_ISL_738033, EPI_ISL_738034, EPI_ISL_738035, EPI_ISL_738036, EPI_ISL_738037, EPI_ISL_738038, EPI_ISL_738039, EPI_ISL_738040, EPI_ISL_738041, EPI_ISL_738042, EPI_ISL_738043 | see above                                                                                                                              | Uganda Central Public Health Lab and Uganda Virus Research Institute                                                                   | MRC/UVRI & LSHTM Uganda Research Unit                                                                                                                                                                                                                                                                                   | Matthew Cotten, Dan Lule Bugembe, My V.T. Phan, Pontiano Kaleebu et al.                                                                                                                                                                                                                                                                                                                                                                                                  |
| EPI_ISL_738044                                                                                                                                                                                                                                                                                                                                                                                                                                                                                                                                                                                                                                                                                                                                                                                                                                                                                                                                                                                                                                                                                                                                                                                                                                                                                                 | SIESP CHIETI - DRIVE IN LANCIANO                                                                                                       | Istituto Zooprofilattico Sperimentale dell'Abruzzo e Molise "G. Caporale"                                                              | Lorusso A, Marcacci M, Di Domenico M, Ancora M, Curini V, Mangone I, Rinaldi A, Di Pasquale A, Cammà C, Puglia I, Savini G                                                                                                                                                                                              |                                                                                                                                                                                                                                                                                                                                                                                                                                                                          |
| EPI_ISL_738045                                                                                                                                                                                                                                                                                                                                                                                                                                                                                                                                                                                                                                                                                                                                                                                                                                                                                                                                                                                                                                                                                                                                                                                                                                                                                                 | SIESP DIPARTIMENTO DI PREVENZIONE CHIETI                                                                                               | Istituto Zooprofilattico Sperimentale dell'Abruzzo e Molise "G. Caporale"                                                              | Lorusso A, Marcacci M, Di Domenico M, Ancora M, Curini V, Mangone I, Rinaldi A, Di Pasquale A, Cammà C, Puglia I, Savini G                                                                                                                                                                                              |                                                                                                                                                                                                                                                                                                                                                                                                                                                                          |
| EPI_ISL_738046, EPI_ISL_738047, EPI_ISL_738048                                                                                                                                                                                                                                                                                                                                                                                                                                                                                                                                                                                                                                                                                                                                                                                                                                                                                                                                                                                                                                                                                                                                                                                                                                                                 | SIESP CHIETI - DRIVE IN ORTONA                                                                                                         | Istituto Zooprofilattico Sperimentale dell'Abruzzo e Molise "G. Caporale"                                                              | Lorusso A, Marcacci M, Di Domenico M, Ancora M, Curini V, Mangone I, Rinaldi A, Di Pasquale A, Cammà C, Puglia I, Savini G                                                                                                                                                                                              |                                                                                                                                                                                                                                                                                                                                                                                                                                                                          |
| EPI_ISL_738064, EPI_ISL_738065                                                                                                                                                                                                                                                                                                                                                                                                                                                                                                                                                                                                                                                                                                                                                                                                                                                                                                                                                                                                                                                                                                                                                                                                                                                                                 | Department of Laboratory Medicine, National Taiwan University Hospital                                                                 | Microbial Genomics Core Lab, National Taiwan University Centers of Genomic and Precision Medicine                                      | Shiou-Hwei Yeh, You-Yu Lin, Ya-Yun Lai, Chiao-Ling Li, Shan-Chwen Chang, Pei-Jer Chen, Sui-Yuan Chang                                                                                                                                                                                                                   |                                                                                                                                                                                                                                                                                                                                                                                                                                                                          |
| EPI_ISL_738080                                                                                                                                                                                                                                                                                                                                                                                                                                                                                                                                                                                                                                                                                                                                                                                                                                                                                                                                                                                                                                                                                                                                                                                                                                                                                                 | Laboratory Services Section, Texas Department of State Health Services                                                                 | Laboratory Services Section, Texas Department of State Health Services                                                                 | Pokharel,A., Oh,B., Bonser,J.D., Tuladhar,R., Pedrueza,M., Zhang,J., Rahman,M., Koag,M., Wang,C., Lee,R. and Kubin,G.                                                                                                                                                                                                   |                                                                                                                                                                                                                                                                                                                                                                                                                                                                          |
| EPI_ISL_738088, EPI_ISL_738089, EPI_ISL_738090, EPI_ISL_738091, EPI_ISL_738092, EPI_ISL_738093, EPI_ISL_738094, EPI_ISL_738095, EPI_ISL_738096, EPI_ISL_738097, EPI_ISL_738098, EPI_ISL_738099, EPI_ISL_738100, EPI_ISL_738101, EPI_ISL_738102, EPI_ISL_738103, EPI_ISL_738104, EPI_ISL_738105, EPI_ISL_738106, EPI_ISL_738107, EPI_ISL_738108, EPI_ISL_738109, EPI_ISL_738110, EPI_ISL_738112, EPI_ISL_738113, EPI_ISL_738114, EPI_ISL_738115, EPI_ISL_738116, EPI_ISL_738117, EPI_ISL_738118, EPI_ISL_738119, EPI_ISL_738120                                                                                                                                                                                                                                                                                                                                                                                                                                                                                                                                                                                                                                                                                                                                                                                 | see above                                                                                                                              | Instituto Nacional de Saude (INSA)                                                                                                     | Borges et al                                                                                                                                                                                                                                                                                                            |                                                                                                                                                                                                                                                                                                                                                                                                                                                                          |
| EPI_ISL_738121, EPI_ISL_738122, EPI_ISL_738123, EPI_ISL_738124, EPI_ISL_738125, EPI_ISL_738126, EPI_ISL_738127, EPI_ISL_738128, EPI_ISL_738129, EPI_ISL_738130, EPI_ISL_738131, EPI_ISL_738132                                                                                                                                                                                                                                                                                                                                                                                                                                                                                                                                                                                                                                                                                                                                                                                                                                                                                                                                                                                                                                                                                                                 | see above                                                                                                                              | IZSM-U.O.C. Virologia                                                                                                                  | Istituto Zooprofilattico Sperimentale del Mezzogiorno                                                                                                                                                                                                                                                                   | Maurizio Viscardi, Lorena Cardillo, Giovanna Fusco                                                                                                                                                                                                                                                                                                                                                                                                                       |
| EPI_ISL_738133                                                                                                                                                                                                                                                                                                                                                                                                                                                                                                                                                                                                                                                                                                                                                                                                                                                                                                                                                                                                                                                                                                                                                                                                                                                                                                 | The Public Health Agency of Sweden                                                                                                     | The Public Health Agency of Sweden                                                                                                     | Oskar Karlsson Lindsjo, Maria Lind Karlberg, Anna-Malin Linde, Sofia Stamouli, Olov Svartstrom, Anna Risberg, Shaman Muradrasoli, Karin Tegmark-Wisell                                                                                                                                                                  |                                                                                                                                                                                                                                                                                                                                                                                                                                                                          |
| EPI_ISL_738134, EPI_ISL_738135, EPI_ISL_738136                                                                                                                                                                                                                                                                                                                                                                                                                                                                                                                                                                                                                                                                                                                                                                                                                                                                                                                                                                                                                                                                                                                                                                                                                                                                 | Department of Virology and Immunology, University of Helsinki and Helsinki University Hospital, Huslab Finland                         | Department of Virology, Faculty of Medicine, University of Helsinki, Helsinki, Finland                                                 | Teemu Smura, Olli Vapalahti, Maija Lappalainen, Satu Kurkela                                                                                                                                                                                                                                                            |                                                                                                                                                                                                                                                                                                                                                                                                                                                                          |
| EPI_ISL_738137                                                                                                                                                                                                                                                                                                                                                                                                                                                                                                                                                                                                                                                                                                                                                                                                                                                                                                                                                                                                                                                                                                                                                                                                                                                                                                 | Area of Virology, Serology and Virology Division (SAVID), New South Wales Health Pathology Randwick                                    | Area of Virology, Serology and Virology Division (SAVID), New South Wales Health Pathology Randwick                                    | Rawlinson, W., Deveson, I., Van Haal, S., Foster, C.                                                                                                                                                                                                                                                                    |                                                                                                                                                                                                                                                                                                                                                                                                                                                                          |
| EPI_ISL_738139, EPI_ISL_738141, EPI_ISL_738142                                                                                                                                                                                                                                                                                                                                                                                                                                                                                                                                                                                                                                                                                                                                                                                                                                                                                                                                                                                                                                                                                                                                                                                                                                                                 | Division of Emerging Infectious Diseases, Bureau of Infectious Diseases Diagnosis Control, Korea Disease Control and Prevention Agency | Division of Emerging Infectious Diseases, Bureau of Infectious Diseases Diagnosis Control, Korea Disease Control and Prevention Agency | Jeong-Min Kim, Il-Hwan Kim, Ae Kyung Park, Namjoo Lee, Sang Hee Woo, Heui Man Kim, Eun-Jin Kim                                                                                                                                                                                                                          |                                                                                                                                                                                                                                                                                                                                                                                                                                                                          |
| EPI_ISL_738144                                                                                                                                                                                                                                                                                                                                                                                                                                                                                                                                                                                                                                                                                                                                                                                                                                                                                                                                                                                                                                                                                                                                                                                                                                                                                                 | University of Bari Biomedical Sciences and Human Oncology                                                                              | University of Bari Biomedical Sciences and Human Oncology                                                                              | Maria Chironna, Anna Sallustio, Daniela Loconsole, Marisa Accogli                                                                                                                                                                                                                                                       |                                                                                                                                                                                                                                                                                                                                                                                                                                                                          |
| EPI_ISL_738146                                                                                                                                                                                                                                                                                                                                                                                                                                                                                                                                                                                                                                                                                                                                                                                                                                                                                                                                                                                                                                                                                                                                                                                                                                                                                                 | Instituto Nacional de Saude (INSA)                                                                                                     | Instituto Nacional de Saude (INSA)                                                                                                     | Borges et al                                                                                                                                                                                                                                                                                                            |                                                                                                                                                                                                                                                                                                                                                                                                                                                                          |
| EPI_ISL_738148, EPI_ISL_738149, EPI_ISL_738150, EPI_ISL_738151, EPI_ISL_738152, EPI_ISL_738153, EPI_ISL_738154, EPI_ISL_738155, EPI_ISL_738156, EPI_ISL_738157, EPI_ISL_738158, EPI_ISL_738159, EPI_ISL_738160, EPI_ISL_738161, EPI_ISL_738162, EPI_ISL_738163, EPI_ISL_738164, EPI_ISL_738165, EPI_ISL_738166, EPI_ISL_738167, EPI_ISL_738168, EPI_ISL_738169, EPI_ISL_738170, EPI_ISL_738171, EPI_ISL_738172, EPI_ISL_738173, EPI_ISL_738174, EPI_ISL_738175, EPI_ISL_738176, EPI_ISL_738177, EPI_ISL_738178, EPI_ISL_738179, EPI_ISL_738180, EPI_ISL_738181, EPI_ISL_738182, EPI_ISL_738183, EPI_ISL_738184, EPI_ISL_738185, EPI_ISL_738186, EPI_ISL_738187, EPI_ISL_738188, EPI_ISL_738189, EPI_ISL_738190, EPI_ISL_738191, EPI_ISL_738192                                                                                                                                                                                                                                                                                                                                                                                                                                                                                                                                                                 | see above                                                                                                                              | Texas Department of State Health Services                                                                                              | Anita Pokharel, Bonnie Oh, James Daniel Bonser, Rashmi Tuladhar, Mayela Pedrueza, Jenny Zhang, Maliha Rahman, Myong Koag, Chung Wang, Rachel Lee, Grace Kubin                                                                                                                                                           |                                                                                                                                                                                                                                                                                                                                                                                                                                                                          |
| EPI_ISL_738195, EPI_ISL_738218, EPI_ISL_738219, EPI_ISL_738220, EPI_ISL_738221, EPI_ISL_738222, EPI_ISL_738223, EPI_ISL_738224, EPI_ISL_738225, EPI_ISL_738226, EPI_ISL_738227, EPI_ISL_738228, EPI_ISL_738229, EPI_ISL_738230, EPI_ISL_738231, EPI_ISL_738232, EPI_ISL_738233, EPI_ISL_738234, EPI_ISL_738235, EPI_ISL_738236, EPI_ISL_738237, EPI_ISL_738238, EPI_ISL_738239, EPI_ISL_738240                                                                                                                                                                                                                                                                                                                                                                                                                                                                                                                                                                                                                                                                                                                                                                                                                                                                                                                 | see above                                                                                                                              | UZ Leuven, National Reference Laboratory for Coronaviruses, Laboratory Medicine, Leuven, Belgium                                       | KU Leuven, Rega Institute, Clinical and Epidemiological Virology                                                                                                                                                                                                                                                        | Tony Wawina-Bokalanga, Joan Marti-Carerras, Bert Vanmechelen, Piet Maes                                                                                                                                                                                                                                                                                                                                                                                                  |
| EPI_ISL_738313                                                                                                                                                                                                                                                                                                                                                                                                                                                                                                                                                                                                                                                                                                                                                                                                                                                                                                                                                                                                                                                                                                                                                                                                                                                                                                 | Foerde Hospital, Department of Microbiology                                                                                            | Norwegian Institute of Public Health, Department of Virology                                                                           | Kathrine Stene-Johansen, Kamilla Heddeland Instefjord, Hilde Elshaug, Atiya R Ali,Marie Paulsen Madsen, Rasmus Riis Kopperud, Hilde Vollen, Karoline Bragstad, Olav Hungnes                                                                                                                                             |                                                                                                                                                                                                                                                                                                                                                                                                                                                                          |
| EPI_ISL_738314                                                                                                                                                                                                                                                                                                                                                                                                                                                                                                                                                                                                                                                                                                                                                                                                                                                                                                                                                                                                                                                                                                                                                                                                                                                                                                 | Unilabs Laboratory Medicine                                                                                                            | Norwegian Institute of Public Health, Department of Virology                                                                           | Kathrine Stene-Johansen, Kamilla Heddeland Instefjord, Hilde Elshaug, Atiya R Ali,Marie Paulsen Madsen, Rasmus Riis Kopperud, Hilde Vollen, Karoline Bragstad, Olav Hungnes                                                                                                                                             |                                                                                                                                                                                                                                                                                                                                                                                                                                                                          |

|                                                                                                                                                                                                                                                                                                                                                                                                                                                                                                                                                                                                                                                                                                                                                                                                                                                                                                                                                                                                                                                                                                                                                                                                                                                                                                                                                                                                                                                                                                                                                                                                                                                                                                                                                                                                                                                                                                                                                                                                                                                                                                                                                                                                                                                                                                                                |                                                                                                  |                                                                  |                                                                                                                                              |
|--------------------------------------------------------------------------------------------------------------------------------------------------------------------------------------------------------------------------------------------------------------------------------------------------------------------------------------------------------------------------------------------------------------------------------------------------------------------------------------------------------------------------------------------------------------------------------------------------------------------------------------------------------------------------------------------------------------------------------------------------------------------------------------------------------------------------------------------------------------------------------------------------------------------------------------------------------------------------------------------------------------------------------------------------------------------------------------------------------------------------------------------------------------------------------------------------------------------------------------------------------------------------------------------------------------------------------------------------------------------------------------------------------------------------------------------------------------------------------------------------------------------------------------------------------------------------------------------------------------------------------------------------------------------------------------------------------------------------------------------------------------------------------------------------------------------------------------------------------------------------------------------------------------------------------------------------------------------------------------------------------------------------------------------------------------------------------------------------------------------------------------------------------------------------------------------------------------------------------------------------------------------------------------------------------------------------------|--------------------------------------------------------------------------------------------------|------------------------------------------------------------------|----------------------------------------------------------------------------------------------------------------------------------------------|
| EPI_ISL_738316                                                                                                                                                                                                                                                                                                                                                                                                                                                                                                                                                                                                                                                                                                                                                                                                                                                                                                                                                                                                                                                                                                                                                                                                                                                                                                                                                                                                                                                                                                                                                                                                                                                                                                                                                                                                                                                                                                                                                                                                                                                                                                                                                                                                                                                                                                                 | Utah Public Health Laboratory                                                                    | Utah Public Health Laboratory                                    | Erin Young, Kelly Oakeson, Tara Gallagher                                                                                                    |
| EPI_ISL_738317, EPI_ISL_738318, EPI_ISL_738319, EPI_ISL_738320, EPI_ISL_738321, EPI_ISL_738322, EPI_ISL_738326, EPI_ISL_738327, EPI_ISL_738328, EPI_ISL_738329, EPI_ISL_738330, EPI_ISL_738331, EPI_ISL_738332, EPI_ISL_738333, EPI_ISL_738334, EPI_ISL_738335, EPI_ISL_738336, EPI_ISL_738337, EPI_ISL_738338, EPI_ISL_738339, EPI_ISL_738340, EPI_ISL_738341, EPI_ISL_738342, EPI_ISL_738343, EPI_ISL_738344, EPI_ISL_738345, EPI_ISL_738346, EPI_ISL_738347, EPI_ISL_738348, EPI_ISL_738349                                                                                                                                                                                                                                                                                                                                                                                                                                                                                                                                                                                                                                                                                                                                                                                                                                                                                                                                                                                                                                                                                                                                                                                                                                                                                                                                                                                                                                                                                                                                                                                                                                                                                                                                                                                                                                 | Landstuhl Regional Medical Center                                                                | United States Air Force School of Aerospace Medicine             | Anthony Fries, Jennifer Meyer, Amanda Javorina, Sarah Purves, William Gruner, Clarise Starr, Elizabeth Macias, Fritz Castillo, Cole Anderson |
| see above                                                                                                                                                                                                                                                                                                                                                                                                                                                                                                                                                                                                                                                                                                                                                                                                                                                                                                                                                                                                                                                                                                                                                                                                                                                                                                                                                                                                                                                                                                                                                                                                                                                                                                                                                                                                                                                                                                                                                                                                                                                                                                                                                                                                                                                                                                                      | Utah Public Health Laboratory                                                                    | Utah Public Health Laboratory                                    | Erin Young, Kelly Oakeson, Tara Gallagher                                                                                                    |
| EPI_ISL_738350, EPI_ISL_738351, EPI_ISL_738352, EPI_ISL_738353, EPI_ISL_738354, EPI_ISL_738355, EPI_ISL_738356, EPI_ISL_738357, EPI_ISL_738358, EPI_ISL_738359                                                                                                                                                                                                                                                                                                                                                                                                                                                                                                                                                                                                                                                                                                                                                                                                                                                                                                                                                                                                                                                                                                                                                                                                                                                                                                                                                                                                                                                                                                                                                                                                                                                                                                                                                                                                                                                                                                                                                                                                                                                                                                                                                                 |                                                                                                  |                                                                  |                                                                                                                                              |
| EPI_ISL_738360, EPI_ISL_738361, EPI_ISL_738362, EPI_ISL_738363, EPI_ISL_738364, EPI_ISL_738365, EPI_ISL_738366, EPI_ISL_738367, EPI_ISL_738368, EPI_ISL_738369, EPI_ISL_738370, EPI_ISL_738371, EPI_ISL_738372, EPI_ISL_738373, EPI_ISL_738374, EPI_ISL_738375, EPI_ISL_738376, EPI_ISL_738377, EPI_ISL_738378, EPI_ISL_738379, EPI_ISL_738380, EPI_ISL_738381, EPI_ISL_738382, EPI_ISL_738383, EPI_ISL_738384, EPI_ISL_738385, EPI_ISL_738386, EPI_ISL_738387, EPI_ISL_738388, EPI_ISL_738389, EPI_ISL_738390, EPI_ISL_738391, EPI_ISL_738392, EPI_ISL_738393, EPI_ISL_738394, EPI_ISL_738395, EPI_ISL_738396, EPI_ISL_738397, EPI_ISL_738398, EPI_ISL_738399, EPI_ISL_738400, EPI_ISL_738401, EPI_ISL_738402, EPI_ISL_738403, EPI_ISL_738404, EPI_ISL_738405, EPI_ISL_738406, EPI_ISL_738407, EPI_ISL_738408, EPI_ISL_738409, EPI_ISL_738410, EPI_ISL_738411, EPI_ISL_738412, EPI_ISL_738413, EPI_ISL_738414, EPI_ISL_738415, EPI_ISL_738416, EPI_ISL_738417, EPI_ISL_738418, EPI_ISL_738419, EPI_ISL_738420, EPI_ISL_738421, EPI_ISL_738422, EPI_ISL_738423, EPI_ISL_738424, EPI_ISL_738425, EPI_ISL_738426, EPI_ISL_738427, EPI_ISL_738428, EPI_ISL_738429, EPI_ISL_738430, EPI_ISL_738431, EPI_ISL_738432, EPI_ISL_738433, EPI_ISL_738434, EPI_ISL_738435, EPI_ISL_738436, EPI_ISL_738437, EPI_ISL_738438, EPI_ISL_738439, EPI_ISL_738440, EPI_ISL_738441, EPI_ISL_738442, EPI_ISL_738443, EPI_ISL_738444, EPI_ISL_738445, EPI_ISL_738446, EPI_ISL_738447, EPI_ISL_738448, EPI_ISL_738449, EPI_ISL_738450, EPI_ISL_738451, EPI_ISL_738452, EPI_ISL_738453, EPI_ISL_738454, EPI_ISL_738455, EPI_ISL_738456, EPI_ISL_738457, EPI_ISL_738458, EPI_ISL_738459, EPI_ISL_738460, EPI_ISL_738461, EPI_ISL_738462, EPI_ISL_738463, EPI_ISL_738464, EPI_ISL_738465, EPI_ISL_738466, EPI_ISL_738467, EPI_ISL_738468, EPI_ISL_738469, EPI_ISL_738470, EPI_ISL_738471, EPI_ISL_738472, EPI_ISL_738473, EPI_ISL_738474, EPI_ISL_738475, EPI_ISL_738476, EPI_ISL_738477, EPI_ISL_738478, EPI_ISL_738479, EPI_ISL_738480, EPI_ISL_738481, EPI_ISL_738482, EPI_ISL_738483, EPI_ISL_738484, EPI_ISL_738485, EPI_ISL_738486, EPI_ISL_738487, EPI_ISL_738488, EPI_ISL_738489, EPI_ISL_738490, EPI_ISL_738491, EPI_ISL_738492, EPI_ISL_738493, EPI_ISL_738494, EPI_ISL_738495, EPI_ISL_738496, EPI_ISL_738497, EPI_ISL_738498, EPI_ISL_738499 |                                                                                                  |                                                                  |                                                                                                                                              |
| see above                                                                                                                                                                                                                                                                                                                                                                                                                                                                                                                                                                                                                                                                                                                                                                                                                                                                                                                                                                                                                                                                                                                                                                                                                                                                                                                                                                                                                                                                                                                                                                                                                                                                                                                                                                                                                                                                                                                                                                                                                                                                                                                                                                                                                                                                                                                      | UZ Leuven, National Reference Laboratory for Coronaviruses, Laboratory Medicine, Leuven, Belgium | KU Leuven, Rega Institute, Clinical and Epidemiological Virology | Tony Wawina-Bokalanga, Joan Marti-Carerras, Bert Vanmechelen, Piet Maes                                                                      |
| EPI_ISL_738500, EPI_ISL_738501, EPI_ISL_738502                                                                                                                                                                                                                                                                                                                                                                                                                                                                                                                                                                                                                                                                                                                                                                                                                                                                                                                                                                                                                                                                                                                                                                                                                                                                                                                                                                                                                                                                                                                                                                                                                                                                                                                                                                                                                                                                                                                                                                                                                                                                                                                                                                                                                                                                                 | Santa Clara County Public Health Laboratory                                                      | Chan-Zuckerberg Biohub                                           | CZB Cliahub Consortium                                                                                                                       |
| EPI_ISL_738503                                                                                                                                                                                                                                                                                                                                                                                                                                                                                                                                                                                                                                                                                                                                                                                                                                                                                                                                                                                                                                                                                                                                                                                                                                                                                                                                                                                                                                                                                                                                                                                                                                                                                                                                                                                                                                                                                                                                                                                                                                                                                                                                                                                                                                                                                                                 | Orange County Public Health Lab                                                                  | Chan-Zuckerberg Biohub                                           | CZB Cliahub Consortium                                                                                                                       |
| EPI_ISL_738504, EPI_ISL_738505                                                                                                                                                                                                                                                                                                                                                                                                                                                                                                                                                                                                                                                                                                                                                                                                                                                                                                                                                                                                                                                                                                                                                                                                                                                                                                                                                                                                                                                                                                                                                                                                                                                                                                                                                                                                                                                                                                                                                                                                                                                                                                                                                                                                                                                                                                 | Humboldt County Public Health Laboratory                                                         | Chan-Zuckerberg Biohub                                           | CZB Cliahub Consortium                                                                                                                       |
| EPI_ISL_738506                                                                                                                                                                                                                                                                                                                                                                                                                                                                                                                                                                                                                                                                                                                                                                                                                                                                                                                                                                                                                                                                                                                                                                                                                                                                                                                                                                                                                                                                                                                                                                                                                                                                                                                                                                                                                                                                                                                                                                                                                                                                                                                                                                                                                                                                                                                 | Monterey County Public Health Lab                                                                | Chan-Zuckerberg Biohub                                           | CZB Cliahub Consortium                                                                                                                       |
| EPI_ISL_738507                                                                                                                                                                                                                                                                                                                                                                                                                                                                                                                                                                                                                                                                                                                                                                                                                                                                                                                                                                                                                                                                                                                                                                                                                                                                                                                                                                                                                                                                                                                                                                                                                                                                                                                                                                                                                                                                                                                                                                                                                                                                                                                                                                                                                                                                                                                 | Orange County Public Health Lab                                                                  | Chan-Zuckerberg Biohub                                           | CZB Cliahub Consortium                                                                                                                       |
| EPI_ISL_738508                                                                                                                                                                                                                                                                                                                                                                                                                                                                                                                                                                                                                                                                                                                                                                                                                                                                                                                                                                                                                                                                                                                                                                                                                                                                                                                                                                                                                                                                                                                                                                                                                                                                                                                                                                                                                                                                                                                                                                                                                                                                                                                                                                                                                                                                                                                 | Santa Clara County Public Health Laboratory                                                      | Chan-Zuckerberg Biohub                                           | CZB Cliahub Consortium                                                                                                                       |
| EPI_ISL_738510                                                                                                                                                                                                                                                                                                                                                                                                                                                                                                                                                                                                                                                                                                                                                                                                                                                                                                                                                                                                                                                                                                                                                                                                                                                                                                                                                                                                                                                                                                                                                                                                                                                                                                                                                                                                                                                                                                                                                                                                                                                                                                                                                                                                                                                                                                                 | Alameda County Public Health Lab                                                                 | Chan-Zuckerberg Biohub                                           | CZB Cliahub Consortium                                                                                                                       |
| EPI_ISL_738511                                                                                                                                                                                                                                                                                                                                                                                                                                                                                                                                                                                                                                                                                                                                                                                                                                                                                                                                                                                                                                                                                                                                                                                                                                                                                                                                                                                                                                                                                                                                                                                                                                                                                                                                                                                                                                                                                                                                                                                                                                                                                                                                                                                                                                                                                                                 | Santa Clara County Public Health Laboratory                                                      | Chan-Zuckerberg Biohub                                           | CZB Cliahub Consortium                                                                                                                       |
| EPI_ISL_738512                                                                                                                                                                                                                                                                                                                                                                                                                                                                                                                                                                                                                                                                                                                                                                                                                                                                                                                                                                                                                                                                                                                                                                                                                                                                                                                                                                                                                                                                                                                                                                                                                                                                                                                                                                                                                                                                                                                                                                                                                                                                                                                                                                                                                                                                                                                 | Napa-Solano-Yolo- Marin County (NSYM) Public Health Laboratories                                 | Chan-Zuckerberg Biohub                                           | CZB Cliahub Consortium                                                                                                                       |
| EPI_ISL_738513, EPI_ISL_738514                                                                                                                                                                                                                                                                                                                                                                                                                                                                                                                                                                                                                                                                                                                                                                                                                                                                                                                                                                                                                                                                                                                                                                                                                                                                                                                                                                                                                                                                                                                                                                                                                                                                                                                                                                                                                                                                                                                                                                                                                                                                                                                                                                                                                                                                                                 | Alameda County Public Health Lab                                                                 | Chan-Zuckerberg Biohub                                           | CZB Cliahub Consortium                                                                                                                       |
| EPI_ISL_738515                                                                                                                                                                                                                                                                                                                                                                                                                                                                                                                                                                                                                                                                                                                                                                                                                                                                                                                                                                                                                                                                                                                                                                                                                                                                                                                                                                                                                                                                                                                                                                                                                                                                                                                                                                                                                                                                                                                                                                                                                                                                                                                                                                                                                                                                                                                 | Orange County Public Health Lab                                                                  | Chan-Zuckerberg Biohub                                           | CZB Cliahub Consortium                                                                                                                       |
| EPI_ISL_738516, EPI_ISL_738517                                                                                                                                                                                                                                                                                                                                                                                                                                                                                                                                                                                                                                                                                                                                                                                                                                                                                                                                                                                                                                                                                                                                                                                                                                                                                                                                                                                                                                                                                                                                                                                                                                                                                                                                                                                                                                                                                                                                                                                                                                                                                                                                                                                                                                                                                                 | Santa Clara County Public Health Laboratory                                                      | Chan-Zuckerberg Biohub                                           | CZB Cliahub Consortium                                                                                                                       |
| EPI_ISL_738518                                                                                                                                                                                                                                                                                                                                                                                                                                                                                                                                                                                                                                                                                                                                                                                                                                                                                                                                                                                                                                                                                                                                                                                                                                                                                                                                                                                                                                                                                                                                                                                                                                                                                                                                                                                                                                                                                                                                                                                                                                                                                                                                                                                                                                                                                                                 | Orange County Public Health Lab                                                                  | Chan-Zuckerberg Biohub                                           | CZB Cliahub Consortium                                                                                                                       |
| EPI_ISL_738519                                                                                                                                                                                                                                                                                                                                                                                                                                                                                                                                                                                                                                                                                                                                                                                                                                                                                                                                                                                                                                                                                                                                                                                                                                                                                                                                                                                                                                                                                                                                                                                                                                                                                                                                                                                                                                                                                                                                                                                                                                                                                                                                                                                                                                                                                                                 | Alameda County Public Health Lab                                                                 | Chan-Zuckerberg Biohub                                           | CZB Cliahub Consortium                                                                                                                       |
| EPI_ISL_738520, EPI_ISL_738521                                                                                                                                                                                                                                                                                                                                                                                                                                                                                                                                                                                                                                                                                                                                                                                                                                                                                                                                                                                                                                                                                                                                                                                                                                                                                                                                                                                                                                                                                                                                                                                                                                                                                                                                                                                                                                                                                                                                                                                                                                                                                                                                                                                                                                                                                                 | Santa Clara County Public Health Laboratory                                                      | Chan-Zuckerberg Biohub                                           | CZB Cliahub Consortium                                                                                                                       |
| EPI_ISL_738522, EPI_ISL_738523, EPI_ISL_738524                                                                                                                                                                                                                                                                                                                                                                                                                                                                                                                                                                                                                                                                                                                                                                                                                                                                                                                                                                                                                                                                                                                                                                                                                                                                                                                                                                                                                                                                                                                                                                                                                                                                                                                                                                                                                                                                                                                                                                                                                                                                                                                                                                                                                                                                                 | Alameda County Public Health Lab                                                                 | Chan-Zuckerberg Biohub                                           | CZB Cliahub Consortium                                                                                                                       |
| EPI_ISL_738525, EPI_ISL_738526                                                                                                                                                                                                                                                                                                                                                                                                                                                                                                                                                                                                                                                                                                                                                                                                                                                                                                                                                                                                                                                                                                                                                                                                                                                                                                                                                                                                                                                                                                                                                                                                                                                                                                                                                                                                                                                                                                                                                                                                                                                                                                                                                                                                                                                                                                 | Santa Clara County Public Health Laboratory                                                      | Chan-Zuckerberg Biohub                                           | CZB Cliahub Consortium                                                                                                                       |
| EPI_ISL_738527                                                                                                                                                                                                                                                                                                                                                                                                                                                                                                                                                                                                                                                                                                                                                                                                                                                                                                                                                                                                                                                                                                                                                                                                                                                                                                                                                                                                                                                                                                                                                                                                                                                                                                                                                                                                                                                                                                                                                                                                                                                                                                                                                                                                                                                                                                                 | Alameda County Public Health Lab                                                                 | Chan-Zuckerberg Biohub                                           | CZB Cliahub Consortium                                                                                                                       |
| EPI_ISL_738529                                                                                                                                                                                                                                                                                                                                                                                                                                                                                                                                                                                                                                                                                                                                                                                                                                                                                                                                                                                                                                                                                                                                                                                                                                                                                                                                                                                                                                                                                                                                                                                                                                                                                                                                                                                                                                                                                                                                                                                                                                                                                                                                                                                                                                                                                                                 | Orange County Public Health Lab                                                                  | Chan-Zuckerberg Biohub                                           | CZB Cliahub Consortium                                                                                                                       |
| EPI_ISL_738530                                                                                                                                                                                                                                                                                                                                                                                                                                                                                                                                                                                                                                                                                                                                                                                                                                                                                                                                                                                                                                                                                                                                                                                                                                                                                                                                                                                                                                                                                                                                                                                                                                                                                                                                                                                                                                                                                                                                                                                                                                                                                                                                                                                                                                                                                                                 | Humboldt County Public Health Laboratory                                                         | Chan-Zuckerberg Biohub                                           | CZB Cliahub Consortium                                                                                                                       |
| EPI_ISL_738531                                                                                                                                                                                                                                                                                                                                                                                                                                                                                                                                                                                                                                                                                                                                                                                                                                                                                                                                                                                                                                                                                                                                                                                                                                                                                                                                                                                                                                                                                                                                                                                                                                                                                                                                                                                                                                                                                                                                                                                                                                                                                                                                                                                                                                                                                                                 | Alameda County Public Health Lab                                                                 | Chan-Zuckerberg Biohub                                           | CZB Cliahub Consortium                                                                                                                       |
| EPI_ISL_738532, EPI_ISL_738533, EPI_ISL_738534                                                                                                                                                                                                                                                                                                                                                                                                                                                                                                                                                                                                                                                                                                                                                                                                                                                                                                                                                                                                                                                                                                                                                                                                                                                                                                                                                                                                                                                                                                                                                                                                                                                                                                                                                                                                                                                                                                                                                                                                                                                                                                                                                                                                                                                                                 | Santa Clara County Public Health Laboratory                                                      | Chan-Zuckerberg Biohub                                           | CZB Cliahub Consortium                                                                                                                       |
| EPI_ISL_738535                                                                                                                                                                                                                                                                                                                                                                                                                                                                                                                                                                                                                                                                                                                                                                                                                                                                                                                                                                                                                                                                                                                                                                                                                                                                                                                                                                                                                                                                                                                                                                                                                                                                                                                                                                                                                                                                                                                                                                                                                                                                                                                                                                                                                                                                                                                 | Alameda County Public Health Lab                                                                 | Chan-Zuckerberg Biohub                                           | CZB Cliahub Consortium                                                                                                                       |
| EPI_ISL_738536                                                                                                                                                                                                                                                                                                                                                                                                                                                                                                                                                                                                                                                                                                                                                                                                                                                                                                                                                                                                                                                                                                                                                                                                                                                                                                                                                                                                                                                                                                                                                                                                                                                                                                                                                                                                                                                                                                                                                                                                                                                                                                                                                                                                                                                                                                                 | Santa Clara County Public Health Laboratory                                                      | Chan-Zuckerberg Biohub                                           | CZB Cliahub Consortium                                                                                                                       |
| EPI_ISL_738537, EPI_ISL_738538                                                                                                                                                                                                                                                                                                                                                                                                                                                                                                                                                                                                                                                                                                                                                                                                                                                                                                                                                                                                                                                                                                                                                                                                                                                                                                                                                                                                                                                                                                                                                                                                                                                                                                                                                                                                                                                                                                                                                                                                                                                                                                                                                                                                                                                                                                 | Alameda County Public Health Lab                                                                 | Chan-Zuckerberg Biohub                                           | CZB Cliahub Consortium                                                                                                                       |
| EPI_ISL_738539                                                                                                                                                                                                                                                                                                                                                                                                                                                                                                                                                                                                                                                                                                                                                                                                                                                                                                                                                                                                                                                                                                                                                                                                                                                                                                                                                                                                                                                                                                                                                                                                                                                                                                                                                                                                                                                                                                                                                                                                                                                                                                                                                                                                                                                                                                                 | Humboldt County Public Health Laboratory                                                         | Chan-Zuckerberg Biohub                                           | CZB Cliahub Consortium                                                                                                                       |
| EPI_ISL_738540                                                                                                                                                                                                                                                                                                                                                                                                                                                                                                                                                                                                                                                                                                                                                                                                                                                                                                                                                                                                                                                                                                                                                                                                                                                                                                                                                                                                                                                                                                                                                                                                                                                                                                                                                                                                                                                                                                                                                                                                                                                                                                                                                                                                                                                                                                                 | Alameda County Public Health Lab                                                                 | Chan-Zuckerberg Biohub                                           | CZB Cliahub Consortium                                                                                                                       |
| EPI_ISL_738541                                                                                                                                                                                                                                                                                                                                                                                                                                                                                                                                                                                                                                                                                                                                                                                                                                                                                                                                                                                                                                                                                                                                                                                                                                                                                                                                                                                                                                                                                                                                                                                                                                                                                                                                                                                                                                                                                                                                                                                                                                                                                                                                                                                                                                                                                                                 | Napa-Solano-Yolo- Marin County (NSYM) Public Health Laboratories                                 | Chan-Zuckerberg Biohub                                           | CZB Cliahub Consortium                                                                                                                       |
| EPI_ISL_738542, EPI_ISL_738543                                                                                                                                                                                                                                                                                                                                                                                                                                                                                                                                                                                                                                                                                                                                                                                                                                                                                                                                                                                                                                                                                                                                                                                                                                                                                                                                                                                                                                                                                                                                                                                                                                                                                                                                                                                                                                                                                                                                                                                                                                                                                                                                                                                                                                                                                                 | Santa Clara County Public Health Laboratory                                                      | Chan-Zuckerberg Biohub                                           | CZB Cliahub Consortium                                                                                                                       |
| EPI_ISL_738544                                                                                                                                                                                                                                                                                                                                                                                                                                                                                                                                                                                                                                                                                                                                                                                                                                                                                                                                                                                                                                                                                                                                                                                                                                                                                                                                                                                                                                                                                                                                                                                                                                                                                                                                                                                                                                                                                                                                                                                                                                                                                                                                                                                                                                                                                                                 | UCSF Clinical Microbiology Laboratory                                                            | Chan-Zuckerberg Biohub                                           | CZB Cliahub Consortium                                                                                                                       |
| EPI_ISL_738545                                                                                                                                                                                                                                                                                                                                                                                                                                                                                                                                                                                                                                                                                                                                                                                                                                                                                                                                                                                                                                                                                                                                                                                                                                                                                                                                                                                                                                                                                                                                                                                                                                                                                                                                                                                                                                                                                                                                                                                                                                                                                                                                                                                                                                                                                                                 | Alameda County Public Health Lab                                                                 | Chan-Zuckerberg Biohub                                           | CZB Cliahub Consortium                                                                                                                       |
| EPI_ISL_738546                                                                                                                                                                                                                                                                                                                                                                                                                                                                                                                                                                                                                                                                                                                                                                                                                                                                                                                                                                                                                                                                                                                                                                                                                                                                                                                                                                                                                                                                                                                                                                                                                                                                                                                                                                                                                                                                                                                                                                                                                                                                                                                                                                                                                                                                                                                 | Santa Clara County Public Health Laboratory                                                      | Chan-Zuckerberg Biohub                                           | CZB Cliahub Consortium                                                                                                                       |
| EPI_ISL_738547                                                                                                                                                                                                                                                                                                                                                                                                                                                                                                                                                                                                                                                                                                                                                                                                                                                                                                                                                                                                                                                                                                                                                                                                                                                                                                                                                                                                                                                                                                                                                                                                                                                                                                                                                                                                                                                                                                                                                                                                                                                                                                                                                                                                                                                                                                                 | Alameda County Public Health Lab                                                                 | Chan-Zuckerberg Biohub                                           | CZB Cliahub Consortium                                                                                                                       |
| EPI_ISL_738548                                                                                                                                                                                                                                                                                                                                                                                                                                                                                                                                                                                                                                                                                                                                                                                                                                                                                                                                                                                                                                                                                                                                                                                                                                                                                                                                                                                                                                                                                                                                                                                                                                                                                                                                                                                                                                                                                                                                                                                                                                                                                                                                                                                                                                                                                                                 | Orange County Public Health Lab                                                                  | Chan-Zuckerberg Biohub                                           | CZB Cliahub Consortium                                                                                                                       |
| EPI_ISL_738549, EPI_ISL_738550, EPI_ISL_738551, EPI_ISL_738552                                                                                                                                                                                                                                                                                                                                                                                                                                                                                                                                                                                                                                                                                                                                                                                                                                                                                                                                                                                                                                                                                                                                                                                                                                                                                                                                                                                                                                                                                                                                                                                                                                                                                                                                                                                                                                                                                                                                                                                                                                                                                                                                                                                                                                                                 | Santa Clara County Public Health Laboratory                                                      | Chan-Zuckerberg Biohub                                           | CZB Cliahub Consortium                                                                                                                       |
| EPI_ISL_738553, EPI_ISL_738554                                                                                                                                                                                                                                                                                                                                                                                                                                                                                                                                                                                                                                                                                                                                                                                                                                                                                                                                                                                                                                                                                                                                                                                                                                                                                                                                                                                                                                                                                                                                                                                                                                                                                                                                                                                                                                                                                                                                                                                                                                                                                                                                                                                                                                                                                                 | Alameda County Public Health Lab                                                                 | Chan-Zuckerberg Biohub                                           | CZB Cliahub Consortium                                                                                                                       |
| EPI_ISL_738555, EPI_ISL_738556, EPI_ISL_738557, EPI_ISL_738558                                                                                                                                                                                                                                                                                                                                                                                                                                                                                                                                                                                                                                                                                                                                                                                                                                                                                                                                                                                                                                                                                                                                                                                                                                                                                                                                                                                                                                                                                                                                                                                                                                                                                                                                                                                                                                                                                                                                                                                                                                                                                                                                                                                                                                                                 | Santa Clara County Public Health Laboratory                                                      | Chan-Zuckerberg Biohub                                           | CZB Cliahub Consortium                                                                                                                       |
| EPI_ISL_738559                                                                                                                                                                                                                                                                                                                                                                                                                                                                                                                                                                                                                                                                                                                                                                                                                                                                                                                                                                                                                                                                                                                                                                                                                                                                                                                                                                                                                                                                                                                                                                                                                                                                                                                                                                                                                                                                                                                                                                                                                                                                                                                                                                                                                                                                                                                 | Orange County Public Health Lab                                                                  | Chan-Zuckerberg Biohub                                           | CZB Cliahub Consortium                                                                                                                       |
| EPI_ISL_738560                                                                                                                                                                                                                                                                                                                                                                                                                                                                                                                                                                                                                                                                                                                                                                                                                                                                                                                                                                                                                                                                                                                                                                                                                                                                                                                                                                                                                                                                                                                                                                                                                                                                                                                                                                                                                                                                                                                                                                                                                                                                                                                                                                                                                                                                                                                 | Santa Clara County Public Health Laboratory                                                      | Chan-Zuckerberg Biohub                                           | CZB Cliahub Consortium                                                                                                                       |

[illegible]

[illegible]

[illegible]

[illegible]

[illegible]



[illegible]

[illegible]

[illegible]

[illegible]

[illegible]

[illegible]

[illegible]

[illegible]



[illegible]

|                                                                                                                                                                                                                                                                                                                                                                                                                                                                                                                                                                                                                                                                                                                                                                                                                                                                |                                                                     |                                                                                  |                                                                                                                                                                                                                                  |
|----------------------------------------------------------------------------------------------------------------------------------------------------------------------------------------------------------------------------------------------------------------------------------------------------------------------------------------------------------------------------------------------------------------------------------------------------------------------------------------------------------------------------------------------------------------------------------------------------------------------------------------------------------------------------------------------------------------------------------------------------------------------------------------------------------------------------------------------------------------|---------------------------------------------------------------------|----------------------------------------------------------------------------------|----------------------------------------------------------------------------------------------------------------------------------------------------------------------------------------------------------------------------------|
| EPI_ISL_739638                                                                                                                                                                                                                                                                                                                                                                                                                                                                                                                                                                                                                                                                                                                                                                                                                                                 | Alameda County Public Health Lab                                    | Chan-Zuckerberg Biohub                                                           | CZB Cliahub Consortium                                                                                                                                                                                                           |
| EPI_ISL_739639                                                                                                                                                                                                                                                                                                                                                                                                                                                                                                                                                                                                                                                                                                                                                                                                                                                 | Tulare County Public Health Lab                                     | Chan-Zuckerberg Biohub                                                           | CZB Cliahub Consortium                                                                                                                                                                                                           |
| EPI_ISL_739641                                                                                                                                                                                                                                                                                                                                                                                                                                                                                                                                                                                                                                                                                                                                                                                                                                                 | Orange County Public Health Lab                                     | Chan-Zuckerberg Biohub                                                           | CZB Cliahub Consortium                                                                                                                                                                                                           |
| EPI_ISL_739642                                                                                                                                                                                                                                                                                                                                                                                                                                                                                                                                                                                                                                                                                                                                                                                                                                                 | Santa Clara County Public Health Laboratory                         | Chan-Zuckerberg Biohub                                                           | CZB Cliahub Consortium                                                                                                                                                                                                           |
| EPI_ISL_739643, EPI_ISL_739644                                                                                                                                                                                                                                                                                                                                                                                                                                                                                                                                                                                                                                                                                                                                                                                                                                 | Alameda County Public Health Lab                                    | Chan-Zuckerberg Biohub                                                           | CZB Cliahub Consortium                                                                                                                                                                                                           |
| EPI_ISL_739645                                                                                                                                                                                                                                                                                                                                                                                                                                                                                                                                                                                                                                                                                                                                                                                                                                                 | Napa-Solano-Yolo- Marin County (NSYM) Public Health Laboratories    | Chan-Zuckerberg Biohub                                                           | CZB Cliahub Consortium                                                                                                                                                                                                           |
| EPI_ISL_739646                                                                                                                                                                                                                                                                                                                                                                                                                                                                                                                                                                                                                                                                                                                                                                                                                                                 | Orange County Public Health Lab                                     | Chan-Zuckerberg Biohub                                                           | CZB Cliahub Consortium                                                                                                                                                                                                           |
| EPI_ISL_739647                                                                                                                                                                                                                                                                                                                                                                                                                                                                                                                                                                                                                                                                                                                                                                                                                                                 | Santa Clara County Public Health Laboratory                         | Chan-Zuckerberg Biohub                                                           | CZB Cliahub Consortium                                                                                                                                                                                                           |
| EPI_ISL_739648                                                                                                                                                                                                                                                                                                                                                                                                                                                                                                                                                                                                                                                                                                                                                                                                                                                 | Alameda County Public Health Lab                                    | Chan-Zuckerberg Biohub                                                           | CZB Cliahub Consortium                                                                                                                                                                                                           |
| EPI_ISL_739649, EPI_ISL_739650                                                                                                                                                                                                                                                                                                                                                                                                                                                                                                                                                                                                                                                                                                                                                                                                                                 | Santa Clara County Public Health Laboratory                         | Chan-Zuckerberg Biohub                                                           | CZB Cliahub Consortium                                                                                                                                                                                                           |
| EPI_ISL_739651                                                                                                                                                                                                                                                                                                                                                                                                                                                                                                                                                                                                                                                                                                                                                                                                                                                 | Humboldt County Public Health Laboratory                            | Chan-Zuckerberg Biohub                                                           | CZB Cliahub Consortium                                                                                                                                                                                                           |
| EPI_ISL_739653                                                                                                                                                                                                                                                                                                                                                                                                                                                                                                                                                                                                                                                                                                                                                                                                                                                 | Santa Clara County Public Health Laboratory                         | Chan-Zuckerberg Biohub                                                           | CZB Cliahub Consortium                                                                                                                                                                                                           |
| EPI_ISL_739654                                                                                                                                                                                                                                                                                                                                                                                                                                                                                                                                                                                                                                                                                                                                                                                                                                                 | Orange County Public Health Lab                                     | Chan-Zuckerberg Biohub                                                           | CZB Cliahub Consortium                                                                                                                                                                                                           |
| EPI_ISL_739655                                                                                                                                                                                                                                                                                                                                                                                                                                                                                                                                                                                                                                                                                                                                                                                                                                                 | Renegade                                                            | Chan-Zuckerberg Biohub                                                           | CZB Cliahub Consortium                                                                                                                                                                                                           |
| EPI_ISL_739656                                                                                                                                                                                                                                                                                                                                                                                                                                                                                                                                                                                                                                                                                                                                                                                                                                                 | Alameda County Public Health Lab                                    | Chan-Zuckerberg Biohub                                                           | CZB Cliahub Consortium                                                                                                                                                                                                           |
| EPI_ISL_739657                                                                                                                                                                                                                                                                                                                                                                                                                                                                                                                                                                                                                                                                                                                                                                                                                                                 | Santa Clara County Public Health Laboratory                         | Chan-Zuckerberg Biohub                                                           | CZB Cliahub Consortium                                                                                                                                                                                                           |
| EPI_ISL_739658                                                                                                                                                                                                                                                                                                                                                                                                                                                                                                                                                                                                                                                                                                                                                                                                                                                 | Orange County Public Health Lab                                     | Chan-Zuckerberg Biohub                                                           | CZB Cliahub Consortium                                                                                                                                                                                                           |
| EPI_ISL_739659, EPI_ISL_739660, EPI_ISL_739661                                                                                                                                                                                                                                                                                                                                                                                                                                                                                                                                                                                                                                                                                                                                                                                                                 | Al-Quds Nutrition and Health Research Institute, Al-Quds University | Al-Quds Nutrition and Health Research Institute, Al-Quds University              | Nasereddin,A., Ereqat,S., Al-Jawabreh,A., Rishmawi,C.                                                                                                                                                                            |
| EPI_ISL_739663, EPI_ISL_739671, EPI_ISL_739672, EPI_ISL_739673, EPI_ISL_739675, EPI_ISL_739680                                                                                                                                                                                                                                                                                                                                                                                                                                                                                                                                                                                                                                                                                                                                                                 | Instituto Nacional de Salud, Bogotá, Colombia                       | Instituto Nacional de Salud, Bogotá, Colombia                                    | Katherine Laiton-Donato, Diego A. Álvarez-Díaz, Carlos Franco-Muñoz, Mauricio Pacheco-Montealegre, Jonathan Reales, Diego Andrés Prada, Sheryl Corchuelo, Magdalena Weisner, Martha Lucia Ospina Martinez, Marcela Mercado-Reyes |
| EPI_ISL_739693, EPI_ISL_739694, EPI_ISL_739695, EPI_ISL_739696, EPI_ISL_739697, EPI_ISL_739698, EPI_ISL_739699                                                                                                                                                                                                                                                                                                                                                                                                                                                                                                                                                                                                                                                                                                                                                 | Laboratoire national de santé, Microbiology, Virology               | Laboratoire national de santé, Microbiology, Microbial Genomics Platform         | Anke Wienecke-Baldacchino, Catherine Ragimbeau,Jessica Tapp, Fatu Djabi, Lise Pignon, Raoul Salmon, Tamir Abdelrahman                                                                                                            |
| EPI_ISL_739700                                                                                                                                                                                                                                                                                                                                                                                                                                                                                                                                                                                                                                                                                                                                                                                                                                                 | Laboratoire national de santé, Microbiology, Virology               | Laboratoire national de santé, Microbiology, Epidemiology and Microbial Genomics | Anke Wienecke-Baldacchino, Catherine Ragimbeau, Tamir Abdelrahman, Jessica Tapp, Fatu Djabi, Trung Nguyen Nguyen                                                                                                                 |
| EPI_ISL_739701, EPI_ISL_739702, EPI_ISL_739703, EPI_ISL_739704, EPI_ISL_739705, EPI_ISL_739706, EPI_ISL_739707, EPI_ISL_739708, EPI_ISL_739709, EPI_ISL_739710, EPI_ISL_739711, EPI_ISL_739712, EPI_ISL_739713, EPI_ISL_739714, EPI_ISL_739715, EPI_ISL_739716, EPI_ISL_739717, EPI_ISL_739718, EPI_ISL_739719, EPI_ISL_739720, EPI_ISL_739721, EPI_ISL_739722, EPI_ISL_739723, EPI_ISL_739724, EPI_ISL_739725, EPI_ISL_739726, EPI_ISL_739727, EPI_ISL_739728, EPI_ISL_739729, EPI_ISL_739730, EPI_ISL_739731, EPI_ISL_739732, EPI_ISL_739733, EPI_ISL_739734, EPI_ISL_739735, EPI_ISL_739736, EPI_ISL_739737, EPI_ISL_739738, EPI_ISL_739739, EPI_ISL_739740, EPI_ISL_739741, EPI_ISL_739742, EPI_ISL_739743, EPI_ISL_739744, EPI_ISL_739745, EPI_ISL_739746, EPI_ISL_739747, EPI_ISL_739748, EPI_ISL_739749, EPI_ISL_739750, EPI_ISL_739751, EPI_ISL_739752 |                                                                     |                                                                                  |                                                                                                                                                                                                                                  |
| see above                                                                                                                                                                                                                                                                                                                                                                                                                                                                                                                                                                                                                                                                                                                                                                                                                                                      | Laboratoire national de santé, Microbiology, Virology               | Laboratoire national de santé, Microbiology, Microbial Genomics Platform         | Anke Wienecke-Baldacchino, Catherine Ragimbeau,Jessica Tapp, Fatu Djabi, Lise Pignon, Raoul Salmon, Tamir Abdelrahman                                                                                                            |
| EPI_ISL_739753                                                                                                                                                                                                                                                                                                                                                                                                                                                                                                                                                                                                                                                                                                                                                                                                                                                 | Laboratoire national de santé, Microbiology, Virology               | Laboratoire national de santé, Microbiology, Microbial Genomics Platform         | Anke Wienecke-Baldacchino, Catherine Ragimbeau, Tamir Abdelrahman, Jessica Tapp, Fatu Djabi                                                                                                                                      |
| EPI_ISL_739754, EPI_ISL_739755, EPI_ISL_739756, EPI_ISL_739757, EPI_ISL_739759, EPI_ISL_739760, EPI_ISL_739761, EPI_ISL_739762, EPI_ISL_739763, EPI_ISL_739764, EPI_ISL_739765, EPI_ISL_739766, EPI_ISL_739767, EPI_ISL_739768, EPI_ISL_739769, EPI_ISL_739770, EPI_ISL_739771, EPI_ISL_739772                                                                                                                                                                                                                                                                                                                                                                                                                                                                                                                                                                 |                                                                     |                                                                                  |                                                                                                                                                                                                                                  |
| see above                                                                                                                                                                                                                                                                                                                                                                                                                                                                                                                                                                                                                                                                                                                                                                                                                                                      | Laboratoire national de santé, Microbiology, Virology               | Laboratoire national de santé, Microbiology, Microbial Genomics Platform         | Anke Wienecke-Baldacchino, Catherine Ragimbeau,Jessica Tapp, Fatu Djabi, Lise Pignon, Raoul Salmon, Tamir Abdelrahman                                                                                                            |
| EPI_ISL_739773                                                                                                                                                                                                                                                                                                                                                                                                                                                                                                                                                                                                                                                                                                                                                                                                                                                 | Laboratoire national de santé, Microbiology, Virology               | Laboratoire national de santé, Microbiology, Microbial Genomics Platform         | Anke Wienecke-Baldacchino, Catherine Ragimbeau, Tamir Abdelrahman, Jessica Tapp, Fatu Djabi                                                                                                                                      |
| EPI_ISL_739774, EPI_ISL_739775, EPI_ISL_739776, EPI_ISL_739777, EPI_ISL_739778, EPI_ISL_739779, EPI_ISL_739780, EPI_ISL_739781, EPI_ISL_739782, EPI_ISL_739783, EPI_ISL_739784, EPI_ISL_739785, EPI_ISL_739786, EPI_ISL_739787, EPI_ISL_739788, EPI_ISL_739789, EPI_ISL_739790, EPI_ISL_739791                                                                                                                                                                                                                                                                                                                                                                                                                                                                                                                                                                 |                                                                     |                                                                                  |                                                                                                                                                                                                                                  |
| see above                                                                                                                                                                                                                                                                                                                                                                                                                                                                                                                                                                                                                                                                                                                                                                                                                                                      | Laboratoire national de santé, Microbiology, Virology               | Laboratoire national de santé, Microbiology, Microbial Genomics Platform         | Anke Wienecke-Baldacchino, Catherine Ragimbeau,Jessica Tapp, Fatu Djabi, Lise Pignon, Raoul Salmon, Tamir Abdelrahman                                                                                                            |
| EPI_ISL_739792                                                                                                                                                                                                                                                                                                                                                                                                                                                                                                                                                                                                                                                                                                                                                                                                                                                 | Laboratoire national de santé, Microbiology, Virology               | Laboratoire national de santé, Microbiology, Microbial Genomics Platform         | Anke Wienecke-Baldacchino, Catherine Ragimbeau, Tamir Abdelrahman, Jessica Tapp, Fatu Djabi                                                                                                                                      |
| EPI_ISL_739793, EPI_ISL_739794, EPI_ISL_739795, EPI_ISL_739796, EPI_ISL_739797, EPI_ISL_739798, EPI_ISL_739799, EPI_ISL_739800, EPI_ISL_739801, EPI_ISL_739802, EPI_ISL_739803, EPI_ISL_739804, EPI_ISL_739805, EPI_ISL_739806, EPI_ISL_739807, EPI_ISL_739808, EPI_ISL_739809, EPI_ISL_739810, EPI_ISL_739811, EPI_ISL_739812, EPI_ISL_739814, EPI_ISL_739815, EPI_ISL_739816, EPI_ISL_739817, EPI_ISL_739818, EPI_ISL_739819, EPI_ISL_739820, EPI_ISL_739821, EPI_ISL_739822, EPI_ISL_739823, EPI_ISL_739824, EPI_ISL_739825, EPI_ISL_739826, EPI_ISL_739827, EPI_ISL_739828, EPI_ISL_739829, EPI_ISL_739830, EPI_ISL_739831, EPI_ISL_739832                                                                                                                                                                                                                 |                                                                     |                                                                                  |                                                                                                                                                                                                                                  |
| see above                                                                                                                                                                                                                                                                                                                                                                                                                                                                                                                                                                                                                                                                                                                                                                                                                                                      | Laboratoire national de santé, Microbiology, Virology               | Laboratoire national de santé, Microbiology, Microbial Genomics Platform         | Anke Wienecke-Baldacchino, Catherine Ragimbeau,Jessica Tapp, Fatu Djabi, Lise Pignon, Raoul Salmon, Tamir Abdelrahman                                                                                                            |
| EPI_ISL_739833, EPI_ISL_739834, EPI_ISL_739835                                                                                                                                                                                                                                                                                                                                                                                                                                                                                                                                                                                                                                                                                                                                                                                                                 | Laboratoire national de santé, Microbiology, Virology               | Laboratoire national de santé, Microbiology, Microbial Genomics Platform         | Anke Wienecke-Baldacchino, Catherine Ragimbeau, Tamir Abdelrahman, Jessica Tapp, Fatu Djabi                                                                                                                                      |
| EPI_ISL_739836, EPI_ISL_739837, EPI_ISL_739838, EPI_ISL_739839, EPI_ISL_739840, EPI_ISL_739841, EPI_ISL_739842, EPI_ISL_739843, EPI_ISL_739844, EPI_ISL_739845, EPI_ISL_739846, EPI_ISL_739847                                                                                                                                                                                                                                                                                                                                                                                                                                                                                                                                                                                                                                                                 |                                                                     |                                                                                  |                                                                                                                                                                                                                                  |
| see above                                                                                                                                                                                                                                                                                                                                                                                                                                                                                                                                                                                                                                                                                                                                                                                                                                                      | Laboratoire national de santé, Microbiology, Virology               | Laboratoire national de santé, Microbiology, Microbial Genomics Platform         | Anke Wienecke-Baldacchino, Catherine Ragimbeau,Jessica Tapp, Fatu Djabi, Lise Pignon, Raoul Salmon, Tamir Abdelrahman                                                                                                            |
| EPI_ISL_739848                                                                                                                                                                                                                                                                                                                                                                                                                                                                                                                                                                                                                                                                                                                                                                                                                                                 | Laboratoire national de santé, Microbiology, Virology               | Laboratoire national de santé, Microbiology, Microbial Genomics Platform         | Anke Wienecke-Baldacchino, Catherine Ragimbeau, Tamir Abdelrahman, Jessica Tapp, Fatu Djabi                                                                                                                                      |
| EPI_ISL_739849, EPI_ISL_739850, EPI_ISL_739851, EPI_ISL_739852, EPI_ISL_739853, EPI_ISL_739854, EPI_ISL_739855, EPI_ISL_739856, EPI_ISL_739857, EPI_ISL_739858, EPI_ISL_739859, EPI_ISL_739860, EPI_ISL_739861, EPI_ISL_739862, EPI_ISL_739863, EPI_ISL_739864, EPI_ISL_739865, EPI_ISL_739866, EPI_ISL_739867, EPI_ISL_739868, EPI_ISL_739869                                                                                                                                                                                                                                                                                                                                                                                                                                                                                                                 |                                                                     |                                                                                  |                                                                                                                                                                                                                                  |
| see above                                                                                                                                                                                                                                                                                                                                                                                                                                                                                                                                                                                                                                                                                                                                                                                                                                                      | Laboratoire national de santé, Microbiology, Virology               | Laboratoire national de santé, Microbiology, Microbial Genomics Platform         | Anke Wienecke-Baldacchino, Catherine Ragimbeau,Jessica Tapp, Fatu Djabi, Lise Pignon, Raoul Salmon, Tamir Abdelrahman                                                                                                            |
| EPI_ISL_739870                                                                                                                                                                                                                                                                                                                                                                                                                                                                                                                                                                                                                                                                                                                                                                                                                                                 | Laboratoire national de santé, Microbiology, Virology               | Laboratoire national de santé, Microbiology, Microbial Genomics Platform         | Anke Wienecke-Baldacchino, Catherine Ragimbeau, Tamir Abdelrahman, Jessica Tapp, Fatu Djabi                                                                                                                                      |
| EPI_ISL_739871, EPI_ISL_739872, EPI_ISL_739873, EPI_ISL_739874, EPI_ISL_739875, EPI_ISL_739876, EPI_ISL_739878, EPI_ISL_739879, EPI_ISL_739881, EPI_ISL_739882, EPI_ISL_739883, EPI_ISL_739884, EPI_ISL_739885, EPI_ISL_739886, EPI_ISL_739887, EPI_ISL_739888, EPI_ISL_739889, EPI_ISL_739890, EPI_ISL_739891, EPI_ISL_739892, EPI_ISL_739893, EPI_ISL_739894, EPI_ISL_739895, EPI_ISL_739896, EPI_ISL_739898, EPI_ISL_739899, EPI_ISL_739900, EPI_ISL_739901, EPI_ISL_739902, EPI_ISL_739903, EPI_ISL_739904, EPI_ISL_739905, EPI_ISL_739906, EPI_ISL_739907, EPI_ISL_739908, EPI_ISL_739909, EPI_ISL_739910, EPI_ISL_739911, EPI_ISL_739912, EPI_ISL_739913, EPI_ISL_739914, EPI_ISL_739915, EPI_ISL_739916, EPI_ISL_739917                                                                                                                                 |                                                                     |                                                                                  |                                                                                                                                                                                                                                  |
| see above                                                                                                                                                                                                                                                                                                                                                                                                                                                                                                                                                                                                                                                                                                                                                                                                                                                      | Laboratoire national de santé, Microbiology, Virology               | Laboratoire national de santé, Microbiology, Microbial                           | Anke Wienecke-Baldacchino, Catherine Ragimbeau,Jessica Tapp, Fatu Djabi, Lise Pignon, Raoul Salmon, Tamir Abdelrahman                                                                                                            |

[illegible]

[illegible]

|                                                                                                                                                                                                                                                                                                                                                                                                                                                                                                                                                                                                                                                                                                                                                                                                                                                                                                                                                                                |                                                                                                                    |                                                                                                                      |                                                                                                                                                                                                                                                                                                       |
|--------------------------------------------------------------------------------------------------------------------------------------------------------------------------------------------------------------------------------------------------------------------------------------------------------------------------------------------------------------------------------------------------------------------------------------------------------------------------------------------------------------------------------------------------------------------------------------------------------------------------------------------------------------------------------------------------------------------------------------------------------------------------------------------------------------------------------------------------------------------------------------------------------------------------------------------------------------------------------|--------------------------------------------------------------------------------------------------------------------|----------------------------------------------------------------------------------------------------------------------|-------------------------------------------------------------------------------------------------------------------------------------------------------------------------------------------------------------------------------------------------------------------------------------------------------|
| EPI_ISL_740430                                                                                                                                                                                                                                                                                                                                                                                                                                                                                                                                                                                                                                                                                                                                                                                                                                                                                                                                                                 | Laboratoire national de santé, Microbiology, Virology                                                              | Genomics Platform                                                                                                    | Anke Wienecke-Baldacchino, Catherine Ragimbeau, Tamir Abdelrahman, Jessica Tapp, Fatu Djabi                                                                                                                                                                                                           |
|                                                                                                                                                                                                                                                                                                                                                                                                                                                                                                                                                                                                                                                                                                                                                                                                                                                                                                                                                                                |                                                                                                                    | Laboratoire national de santé, Microbiology, Microbial Genomics Platform                                             |                                                                                                                                                                                                                                                                                                       |
| EPI_ISL_740431, EPI_ISL_740432, EPI_ISL_740433, EPI_ISL_740434, EPI_ISL_740435, EPI_ISL_740436, EPI_ISL_740437                                                                                                                                                                                                                                                                                                                                                                                                                                                                                                                                                                                                                                                                                                                                                                                                                                                                 | Laboratoire national de santé, Microbiology, Virology                                                              | Laboratoire national de santé, Microbiology, Microbial Genomics Platform                                             | Anke Wienecke-Baldacchino, Catherine Ragimbeau, Jessica Tapp, Fatu Djabi, Lise Pignon, Raoul Salmon, Tamir Abdelrahman                                                                                                                                                                                |
| EPI_ISL_740438                                                                                                                                                                                                                                                                                                                                                                                                                                                                                                                                                                                                                                                                                                                                                                                                                                                                                                                                                                 | Laboratoire national de santé, Microbiology, Virology                                                              | Laboratoire national de santé, Microbiology, Microbial Genomics Platform                                             | Anke Wienecke-Baldacchino, Catherine Ragimbeau, Tamir Abdelrahman, Jessica Tapp, Fatu Djabi                                                                                                                                                                                                           |
| EPI_ISL_740441, EPI_ISL_740442, EPI_ISL_740443, EPI_ISL_740445, EPI_ISL_740446, EPI_ISL_740447, EPI_ISL_740448, EPI_ISL_740449, EPI_ISL_740450, EPI_ISL_740451, EPI_ISL_740452, EPI_ISL_740453, EPI_ISL_740454, EPI_ISL_740455                                                                                                                                                                                                                                                                                                                                                                                                                                                                                                                                                                                                                                                                                                                                                 | see above                                                                                                          | Laboratoire national de santé, Microbiology, Microbial Genomics Platform                                             | Anke Wienecke-Baldacchino, Catherine Ragimbeau, Jessica Tapp, Fatu Djabi, Lise Pignon, Raoul Salmon, Tamir Abdelrahman                                                                                                                                                                                |
| EPI_ISL_740456                                                                                                                                                                                                                                                                                                                                                                                                                                                                                                                                                                                                                                                                                                                                                                                                                                                                                                                                                                 |                                                                                                                    |                                                                                                                      |                                                                                                                                                                                                                                                                                                       |
| EPI_ISL_740457, EPI_ISL_740458, EPI_ISL_740459, EPI_ISL_740460, EPI_ISL_740461, EPI_ISL_740462, EPI_ISL_740463, EPI_ISL_740464, EPI_ISL_740466, EPI_ISL_740467, EPI_ISL_740468                                                                                                                                                                                                                                                                                                                                                                                                                                                                                                                                                                                                                                                                                                                                                                                                 | see above                                                                                                          | Laboratoire national de santé, Microbiology, Microbial Genomics Platform                                             | Anke Wienecke-Baldacchino, Catherine Ragimbeau, Jessica Tapp, Fatu Djabi, Lise Pignon, Raoul Salmon, Tamir Abdelrahman                                                                                                                                                                                |
| EPI_ISL_740469                                                                                                                                                                                                                                                                                                                                                                                                                                                                                                                                                                                                                                                                                                                                                                                                                                                                                                                                                                 |                                                                                                                    |                                                                                                                      |                                                                                                                                                                                                                                                                                                       |
| EPI_ISL_740470                                                                                                                                                                                                                                                                                                                                                                                                                                                                                                                                                                                                                                                                                                                                                                                                                                                                                                                                                                 | Laboratoire national de santé, Microbiology, Virology                                                              | Laboratoire national de santé, Microbiology, Microbial Genomics Platform                                             | Anke Wienecke-Baldacchino, Catherine Ragimbeau, Jessica Tapp, Fatu Djabi, Lise Pignon, Raoul Salmon, Tamir Abdelrahman                                                                                                                                                                                |
| EPI_ISL_740471                                                                                                                                                                                                                                                                                                                                                                                                                                                                                                                                                                                                                                                                                                                                                                                                                                                                                                                                                                 | Laboratoire national de santé, Microbiology, Virology                                                              | Laboratoire national de santé, Microbiology, Microbial Genomics Platform                                             | Anke Wienecke-Baldacchino, Catherine Ragimbeau, Tamir Abdelrahman, Jessica Tapp, Fatu Djabi                                                                                                                                                                                                           |
| EPI_ISL_740472, EPI_ISL_740473, EPI_ISL_740474, EPI_ISL_740475, EPI_ISL_740476, EPI_ISL_740477, EPI_ISL_740478, EPI_ISL_740479, EPI_ISL_740480, EPI_ISL_740481, EPI_ISL_740482, EPI_ISL_740483, EPI_ISL_740484, EPI_ISL_740485                                                                                                                                                                                                                                                                                                                                                                                                                                                                                                                                                                                                                                                                                                                                                 | see above                                                                                                          | Laboratoire national de santé, Microbiology, Microbial Genomics Platform                                             | Anke Wienecke-Baldacchino, Catherine Ragimbeau, Jessica Tapp, Fatu Djabi, Lise Pignon, Raoul Salmon, Tamir Abdelrahman                                                                                                                                                                                |
| EPI_ISL_740486                                                                                                                                                                                                                                                                                                                                                                                                                                                                                                                                                                                                                                                                                                                                                                                                                                                                                                                                                                 |                                                                                                                    |                                                                                                                      |                                                                                                                                                                                                                                                                                                       |
| EPI_ISL_740487, EPI_ISL_740488, EPI_ISL_740489, EPI_ISL_740490, EPI_ISL_740491, EPI_ISL_740492, EPI_ISL_740493, EPI_ISL_740494, EPI_ISL_740495, EPI_ISL_740496, EPI_ISL_740497, EPI_ISL_740498, EPI_ISL_740499, EPI_ISL_740500, EPI_ISL_740501, EPI_ISL_740502, EPI_ISL_740503, EPI_ISL_740504, EPI_ISL_740505, EPI_ISL_740506, EPI_ISL_740507, EPI_ISL_740508, EPI_ISL_740509, EPI_ISL_740511, EPI_ISL_740512, EPI_ISL_740513, EPI_ISL_740514, EPI_ISL_740515, EPI_ISL_740516, EPI_ISL_740517, EPI_ISL_740518, EPI_ISL_740519, EPI_ISL_740520, EPI_ISL_740521, EPI_ISL_740522, EPI_ISL_740523, EPI_ISL_740524, EPI_ISL_740525, EPI_ISL_740526, EPI_ISL_740527, EPI_ISL_740528, EPI_ISL_740529, EPI_ISL_740530, EPI_ISL_740531, EPI_ISL_740532, EPI_ISL_740533, EPI_ISL_740534, EPI_ISL_740535, EPI_ISL_740536, EPI_ISL_740537, EPI_ISL_740538, EPI_ISL_740539, EPI_ISL_740540, EPI_ISL_740541, EPI_ISL_740542, EPI_ISL_740543, EPI_ISL_740544, EPI_ISL_740545, EPI_ISL_740546 | see above                                                                                                          | Laboratoire national de santé, Microbiology, Microbial Genomics Platform                                             | Anke Wienecke-Baldacchino, Catherine Ragimbeau, Jessica Tapp, Fatu Djabi, Lise Pignon, Raoul Salmon, Tamir Abdelrahman                                                                                                                                                                                |
| EPI_ISL_740547                                                                                                                                                                                                                                                                                                                                                                                                                                                                                                                                                                                                                                                                                                                                                                                                                                                                                                                                                                 |                                                                                                                    |                                                                                                                      |                                                                                                                                                                                                                                                                                                       |
| EPI_ISL_740863, EPI_ISL_740864, EPI_ISL_740865                                                                                                                                                                                                                                                                                                                                                                                                                                                                                                                                                                                                                                                                                                                                                                                                                                                                                                                                 | Department of Laboratory Medicine, National Taiwan University Hospital                                             | Microbial Genomics Core Lab, National Taiwan University Centers of Genomic and Precision Medicine                    | Shiou-Hwei Yeh, You-Yu Lin, Ya-Yun Lai, Chiao-Ling Li, Shan-Chwen Chang, Pei-Jer Chen, Sui-Yuan Chang                                                                                                                                                                                                 |
| EPI_ISL_740866                                                                                                                                                                                                                                                                                                                                                                                                                                                                                                                                                                                                                                                                                                                                                                                                                                                                                                                                                                 | South Eastern Area Laboratory Services (SEALS)                                                                     | NSW Health Pathology - Institute of Clinical Pathology and Medical Research; Westmead Hospital; University of Sydney | CIDM-PH et al.                                                                                                                                                                                                                                                                                        |
| EPI_ISL_740867, EPI_ISL_740868, EPI_ISL_740869, EPI_ISL_740870, EPI_ISL_740871, EPI_ISL_740872, EPI_ISL_740873, EPI_ISL_740874                                                                                                                                                                                                                                                                                                                                                                                                                                                                                                                                                                                                                                                                                                                                                                                                                                                 | Pathology North - Royal North Shore Hospital - NSW Health Pathology                                                | NSW Health Pathology - Institute of Clinical Pathology and Medical Research; Westmead Hospital; University of Sydney | CIDM-PH et al.                                                                                                                                                                                                                                                                                        |
| EPI_ISL_740875, EPI_ISL_740876, EPI_ISL_740877, EPI_ISL_740878                                                                                                                                                                                                                                                                                                                                                                                                                                                                                                                                                                                                                                                                                                                                                                                                                                                                                                                 | South Eastern Area Laboratory Services (SEALS)                                                                     | NSW Health Pathology - Institute of Clinical Pathology and Medical Research; Westmead Hospital; University of Sydney | CIDM-PH et al.                                                                                                                                                                                                                                                                                        |
| EPI_ISL_740879, EPI_ISL_740880                                                                                                                                                                                                                                                                                                                                                                                                                                                                                                                                                                                                                                                                                                                                                                                                                                                                                                                                                 | Pathology North - Royal North Shore Hospital - NSW Health Pathology                                                | NSW Health Pathology - Institute of Clinical Pathology and Medical Research; Westmead Hospital; University of Sydney | CIDM-PH et al.                                                                                                                                                                                                                                                                                        |
| EPI_ISL_740881, EPI_ISL_740882                                                                                                                                                                                                                                                                                                                                                                                                                                                                                                                                                                                                                                                                                                                                                                                                                                                                                                                                                 | Histopath                                                                                                          | NSW Health Pathology - Institute of Clinical Pathology and Medical Research; Westmead Hospital; University of Sydney | CIDM-PH et al.                                                                                                                                                                                                                                                                                        |
| EPI_ISL_740883, EPI_ISL_740884, EPI_ISL_740885, EPI_ISL_740886, EPI_ISL_740887, EPI_ISL_740888, EPI_ISL_740889                                                                                                                                                                                                                                                                                                                                                                                                                                                                                                                                                                                                                                                                                                                                                                                                                                                                 | Douglass Hanly Moir Pathology                                                                                      | NSW Health Pathology - Institute of Clinical Pathology and Medical Research; Westmead Hospital; University of Sydney | CIDM-PH et al.                                                                                                                                                                                                                                                                                        |
| EPI_ISL_740890                                                                                                                                                                                                                                                                                                                                                                                                                                                                                                                                                                                                                                                                                                                                                                                                                                                                                                                                                                 | Pathology North - Royal North Shore Hospital - NSW Health Pathology                                                | NSW Health Pathology - Institute of Clinical Pathology and Medical Research; Westmead Hospital; University of Sydney | CIDM-PH et al.                                                                                                                                                                                                                                                                                        |
| EPI_ISL_740891                                                                                                                                                                                                                                                                                                                                                                                                                                                                                                                                                                                                                                                                                                                                                                                                                                                                                                                                                                 | Pathology West - NSW Health Pathology                                                                              | NSW Health Pathology - Institute of Clinical Pathology and Medical Research; Westmead Hospital; University of Sydney | CIDM-PH et al.                                                                                                                                                                                                                                                                                        |
| EPI_ISL_740892, EPI_ISL_740893                                                                                                                                                                                                                                                                                                                                                                                                                                                                                                                                                                                                                                                                                                                                                                                                                                                                                                                                                 | Pathology North - Hunter - NSW Health Pathology                                                                    | NSW Health Pathology - Institute of Clinical Pathology and Medical Research; Westmead Hospital; University of Sydney | CIDM-PH et al.                                                                                                                                                                                                                                                                                        |
| EPI_ISL_740894, EPI_ISL_740895                                                                                                                                                                                                                                                                                                                                                                                                                                                                                                                                                                                                                                                                                                                                                                                                                                                                                                                                                 | Lavery Pathology                                                                                                   | NSW Health Pathology - Institute of Clinical Pathology and Medical Research; Westmead Hospital; University of Sydney | CIDM-PH et al.                                                                                                                                                                                                                                                                                        |
| EPI_ISL_740896                                                                                                                                                                                                                                                                                                                                                                                                                                                                                                                                                                                                                                                                                                                                                                                                                                                                                                                                                                 | Sydney South West Pathology Service (SSWPS) - Royal Prince Alfred Hospital - NSW Health Pathology                  | NSW Health Pathology - Institute of Clinical Pathology and Medical Research; Westmead Hospital; University of Sydney | CIDM-PH et al.                                                                                                                                                                                                                                                                                        |
| EPI_ISL_740897, EPI_ISL_740898, EPI_ISL_740899, EPI_ISL_740900, EPI_ISL_740901, EPI_ISL_740902, EPI_ISL_740903, EPI_ISL_740904, EPI_ISL_740905, EPI_ISL_740906, EPI_ISL_740907, EPI_ISL_740908, EPI_ISL_740909, EPI_ISL_740910, EPI_ISL_740911, EPI_ISL_740912, EPI_ISL_740913, EPI_ISL_740914, EPI_ISL_740915, EPI_ISL_740916, EPI_ISL_740917, EPI_ISL_740918, EPI_ISL_740919, EPI_ISL_740920, EPI_ISL_740921, EPI_ISL_740922, EPI_ISL_740923, EPI_ISL_740924, EPI_ISL_740925, EPI_ISL_740926, EPI_ISL_740927, EPI_ISL_740928, EPI_ISL_740929, EPI_ISL_740930, EPI_ISL_740931, EPI_ISL_740932, EPI_ISL_740933, EPI_ISL_740934, EPI_ISL_740935, EPI_ISL_740936, EPI_ISL_740937, EPI_ISL_740938, EPI_ISL_740939, EPI_ISL_740940, EPI_ISL_740941, EPI_ISL_740942, EPI_ISL_740943, EPI_ISL_740944, EPI_ISL_740945, EPI_ISL_740946, EPI_ISL_740947, EPI_ISL_740948, EPI_ISL_740949, EPI_ISL_740950, EPI_ISL_740951, EPI_ISL_740952                                                 | Histopath                                                                                                          | NSW Health Pathology - Institute of Clinical Pathology and Medical Research; Westmead Hospital; University of Sydney | CIDM-PH et al.                                                                                                                                                                                                                                                                                        |
| see above                                                                                                                                                                                                                                                                                                                                                                                                                                                                                                                                                                                                                                                                                                                                                                                                                                                                                                                                                                      | Oxford Viroomics, NDM, University of Oxford; Oxford University Hospitals; Basingstoke and North Hampshire Hospital | COVID-19 Genomics UK (COG-UK) Consortium                                                                             | Tanya Golubchik, David Bonsall, George Macintyre, Amy Trebes, Mariateresa de Cesare, Catrin Moore, Alex Mobbs, Anita Justice, Robert Shaw, Monique Andersson, Timothy Peto, Emma Wise, Nathan Moore, Jessica Lynch, Nick Cortes, Matilde Mori, Stephen Kidd, David Buck, John Todd, Christophe Fraser |
| EPI_ISL_740953, EPI_ISL_740954, EPI_ISL_740955, EPI_ISL_740956, EPI_ISL_740957, EPI_ISL_740958, EPI_ISL_740959, EPI_ISL_740961, EPI_ISL_740962, EPI_ISL_740963, EPI_ISL_740964, EPI_ISL_740965, EPI_ISL_740966, EPI_ISL_740967, EPI_ISL_740968, EPI_ISL_740969, EPI_ISL_740970, EPI_ISL_740972,                                                                                                                                                                                                                                                                                                                                                                                                                                                                                                                                                                                                                                                                                |                                                                                                                    |                                                                                                                      |                                                                                                                                                                                                                                                                                                       |









[illegible]

[illegible]

|                                                                                                                                                                                                                                                                                                                                                                                                                                                                                                                                                                                                                                                                                                                                                                                                                                                                                                                                                                                                                                                                                |                                                                                                     |                                                                                                     |                                                                                                                                                                                  |
|--------------------------------------------------------------------------------------------------------------------------------------------------------------------------------------------------------------------------------------------------------------------------------------------------------------------------------------------------------------------------------------------------------------------------------------------------------------------------------------------------------------------------------------------------------------------------------------------------------------------------------------------------------------------------------------------------------------------------------------------------------------------------------------------------------------------------------------------------------------------------------------------------------------------------------------------------------------------------------------------------------------------------------------------------------------------------------|-----------------------------------------------------------------------------------------------------|-----------------------------------------------------------------------------------------------------|----------------------------------------------------------------------------------------------------------------------------------------------------------------------------------|
|                                                                                                                                                                                                                                                                                                                                                                                                                                                                                                                                                                                                                                                                                                                                                                                                                                                                                                                                                                                                                                                                                |                                                                                                     | Genomics Platform                                                                                   |                                                                                                                                                                                  |
| EPI_ISL_744751                                                                                                                                                                                                                                                                                                                                                                                                                                                                                                                                                                                                                                                                                                                                                                                                                                                                                                                                                                                                                                                                 | Laboratoire national de santé, Microbiology, Virology                                               | Laboratoire national de santé, Microbiology, Microbial Genomics Platform                            | Anke Wienecke-Baldacchino, Catherine Ragimbeau, Tamir Abdelrahman, Jessica Tapp, Fatu Djabi                                                                                      |
| EPI_ISL_744752, EPI_ISL_744753, EPI_ISL_744754, EPI_ISL_744755, EPI_ISL_744756, EPI_ISL_744757, EPI_ISL_744758, EPI_ISL_744759, EPI_ISL_744760, EPI_ISL_744761, EPI_ISL_744762, EPI_ISL_744763, EPI_ISL_744764, EPI_ISL_744765                                                                                                                                                                                                                                                                                                                                                                                                                                                                                                                                                                                                                                                                                                                                                                                                                                                 |                                                                                                     |                                                                                                     |                                                                                                                                                                                  |
| see above                                                                                                                                                                                                                                                                                                                                                                                                                                                                                                                                                                                                                                                                                                                                                                                                                                                                                                                                                                                                                                                                      | Laboratoire national de santé, Microbiology, Virology                                               | Laboratoire national de santé, Microbiology, Microbial Genomics Platform                            | Anke Wienecke-Baldacchino, Catherine Ragimbeau, Jessica Tapp, Fatu Djabi, Lise Pignon, Raoul Salmon, Tamir Abdelrahman                                                           |
| EPI_ISL_744766                                                                                                                                                                                                                                                                                                                                                                                                                                                                                                                                                                                                                                                                                                                                                                                                                                                                                                                                                                                                                                                                 | Laboratoire national de santé, Microbiology, Virology                                               | Laboratoire national de santé, Microbiology, Microbial Genomics Platform                            | Anke Wienecke-Baldacchino, Catherine Ragimbeau, Tamir Abdelrahman, Jessica Tapp, Fatu Djabi                                                                                      |
| EPI_ISL_744767, EPI_ISL_744768, EPI_ISL_744769, EPI_ISL_744770, EPI_ISL_744771, EPI_ISL_744772, EPI_ISL_744773, EPI_ISL_744774, EPI_ISL_744775, EPI_ISL_744776, EPI_ISL_744777, EPI_ISL_744778, EPI_ISL_744779, EPI_ISL_744780, EPI_ISL_744781, EPI_ISL_744782, EPI_ISL_744783, EPI_ISL_744784, EPI_ISL_744785, EPI_ISL_744786, EPI_ISL_744787, EPI_ISL_744788, EPI_ISL_744789, EPI_ISL_744790, EPI_ISL_744791, EPI_ISL_744792, EPI_ISL_744793, EPI_ISL_744794, EPI_ISL_744795, EPI_ISL_744796, EPI_ISL_744797, EPI_ISL_744798, EPI_ISL_744799, EPI_ISL_744800, EPI_ISL_744801, EPI_ISL_744802, EPI_ISL_744803, EPI_ISL_744804, EPI_ISL_744805, EPI_ISL_744806, EPI_ISL_744807, EPI_ISL_744808, EPI_ISL_744809, EPI_ISL_744810                                                                                                                                                                                                                                                                                                                                                 |                                                                                                     |                                                                                                     |                                                                                                                                                                                  |
| see above                                                                                                                                                                                                                                                                                                                                                                                                                                                                                                                                                                                                                                                                                                                                                                                                                                                                                                                                                                                                                                                                      | Laboratoire national de santé, Microbiology, Virology                                               | Laboratoire national de santé, Microbiology, Microbial Genomics Platform                            | Anke Wienecke-Baldacchino, Catherine Ragimbeau, Jessica Tapp, Fatu Djabi, Lise Pignon, Raoul Salmon, Tamir Abdelrahman                                                           |
| EPI_ISL_744811                                                                                                                                                                                                                                                                                                                                                                                                                                                                                                                                                                                                                                                                                                                                                                                                                                                                                                                                                                                                                                                                 | Laboratoire national de santé, Microbiology, Virology                                               | Laboratoire national de santé, Microbiology, Microbial Genomics Platform                            | Anke Wienecke-Baldacchino, Catherine Ragimbeau, Tamir Abdelrahman, Jessica Tapp, Fatu Djabi                                                                                      |
| EPI_ISL_744812, EPI_ISL_744813, EPI_ISL_744814, EPI_ISL_744815, EPI_ISL_744816, EPI_ISL_744817, EPI_ISL_744818, EPI_ISL_744820, EPI_ISL_744821, EPI_ISL_744822, EPI_ISL_744823, EPI_ISL_744824, EPI_ISL_744825, EPI_ISL_744826, EPI_ISL_744827, EPI_ISL_744828, EPI_ISL_744829, EPI_ISL_744831, EPI_ISL_744832, EPI_ISL_744833, EPI_ISL_744834, EPI_ISL_744835, EPI_ISL_744836, EPI_ISL_744837, EPI_ISL_744838, EPI_ISL_744839, EPI_ISL_744840, EPI_ISL_744841, EPI_ISL_744842, EPI_ISL_744844, EPI_ISL_744845, EPI_ISL_744846, EPI_ISL_744847, EPI_ISL_744848, EPI_ISL_744849, EPI_ISL_744850, EPI_ISL_744851, EPI_ISL_744852, EPI_ISL_744853, EPI_ISL_744854, EPI_ISL_744855, EPI_ISL_744856, EPI_ISL_744857, EPI_ISL_744858, EPI_ISL_744859, EPI_ISL_744860, EPI_ISL_744861, EPI_ISL_744862, EPI_ISL_744863, EPI_ISL_744864, EPI_ISL_744865, EPI_ISL_744866, EPI_ISL_744867, EPI_ISL_744868, EPI_ISL_744869, EPI_ISL_744871, EPI_ISL_744872, EPI_ISL_744873                                                                                                                 |                                                                                                     |                                                                                                     |                                                                                                                                                                                  |
| see above                                                                                                                                                                                                                                                                                                                                                                                                                                                                                                                                                                                                                                                                                                                                                                                                                                                                                                                                                                                                                                                                      | Laboratoire national de santé, Microbiology, Virology                                               | Laboratoire national de santé, Microbiology, Microbial Genomics Platform                            | Anke Wienecke-Baldacchino, Catherine Ragimbeau, Jessica Tapp, Fatu Djabi, Lise Pignon, Raoul Salmon, Tamir Abdelrahman                                                           |
| EPI_ISL_744874                                                                                                                                                                                                                                                                                                                                                                                                                                                                                                                                                                                                                                                                                                                                                                                                                                                                                                                                                                                                                                                                 | Laboratoire national de santé, Microbiology, Virology                                               | Laboratoire national de santé, Microbiology, Microbial Genomics Platform                            | Anke Wienecke-Baldacchino, Catherine Ragimbeau, Tamir Abdelrahman, Jessica Tapp, Fatu Djabi                                                                                      |
| EPI_ISL_744875, EPI_ISL_744876, EPI_ISL_744877, EPI_ISL_744878, EPI_ISL_744879, EPI_ISL_744880, EPI_ISL_744881, EPI_ISL_744882, EPI_ISL_744883, EPI_ISL_744884, EPI_ISL_744885                                                                                                                                                                                                                                                                                                                                                                                                                                                                                                                                                                                                                                                                                                                                                                                                                                                                                                 |                                                                                                     |                                                                                                     |                                                                                                                                                                                  |
| see above                                                                                                                                                                                                                                                                                                                                                                                                                                                                                                                                                                                                                                                                                                                                                                                                                                                                                                                                                                                                                                                                      | Laboratoire national de santé, Microbiology, Virology                                               | Laboratoire national de santé, Microbiology, Microbial Genomics Platform                            | Anke Wienecke-Baldacchino, Catherine Ragimbeau, Jessica Tapp, Fatu Djabi, Lise Pignon, Raoul Salmon, Tamir Abdelrahman                                                           |
| EPI_ISL_744886                                                                                                                                                                                                                                                                                                                                                                                                                                                                                                                                                                                                                                                                                                                                                                                                                                                                                                                                                                                                                                                                 | Laboratoire national de santé, Microbiology, Virology                                               | Laboratoire national de santé, Microbiology, Microbial Genomics Platform                            | Anke Wienecke-Baldacchino, Catherine Ragimbeau, Tamir Abdelrahman, Jessica Tapp, Fatu Djabi                                                                                      |
| EPI_ISL_744887, EPI_ISL_744888, EPI_ISL_744889, EPI_ISL_744890, EPI_ISL_744891, EPI_ISL_744892, EPI_ISL_744893, EPI_ISL_744895, EPI_ISL_744896, EPI_ISL_744897, EPI_ISL_744898, EPI_ISL_744899, EPI_ISL_744900, EPI_ISL_744901, EPI_ISL_744902, EPI_ISL_744903, EPI_ISL_744904, EPI_ISL_744905, EPI_ISL_744906, EPI_ISL_744907, EPI_ISL_744909, EPI_ISL_744910, EPI_ISL_744911, EPI_ISL_744912, EPI_ISL_744913, EPI_ISL_744914, EPI_ISL_744915, EPI_ISL_744916, EPI_ISL_744917, EPI_ISL_744918, EPI_ISL_744919, EPI_ISL_744920, EPI_ISL_744921, EPI_ISL_744922, EPI_ISL_744923, EPI_ISL_744924, EPI_ISL_744925, EPI_ISL_744926, EPI_ISL_744927, EPI_ISL_744928, EPI_ISL_744929, EPI_ISL_744930, EPI_ISL_744931, EPI_ISL_744932, EPI_ISL_744933, EPI_ISL_744934, EPI_ISL_744935, EPI_ISL_744936, EPI_ISL_744937, EPI_ISL_744938, EPI_ISL_744939, EPI_ISL_744940, EPI_ISL_744941, EPI_ISL_744942, EPI_ISL_744943, EPI_ISL_744944, EPI_ISL_744945, EPI_ISL_744946, EPI_ISL_744947, EPI_ISL_744948, EPI_ISL_744949, EPI_ISL_744950, EPI_ISL_744951, EPI_ISL_744952, EPI_ISL_744953 |                                                                                                     |                                                                                                     |                                                                                                                                                                                  |
| see above                                                                                                                                                                                                                                                                                                                                                                                                                                                                                                                                                                                                                                                                                                                                                                                                                                                                                                                                                                                                                                                                      | Laboratoire national de santé, Microbiology, Virology                                               | Laboratoire national de santé, Microbiology, Microbial Genomics Platform                            | Anke Wienecke-Baldacchino, Catherine Ragimbeau, Jessica Tapp, Fatu Djabi, Lise Pignon, Raoul Salmon, Tamir Abdelrahman                                                           |
| EPI_ISL_744954                                                                                                                                                                                                                                                                                                                                                                                                                                                                                                                                                                                                                                                                                                                                                                                                                                                                                                                                                                                                                                                                 | Laboratoire national de santé, Microbiology, Virology                                               | Laboratoire national de santé, Microbiology, Microbial Genomics Platform                            | Anke Wienecke-Baldacchino, Catherine Ragimbeau, Tamir Abdelrahman, Jessica Tapp, Fatu Djabi                                                                                      |
| EPI_ISL_744955, EPI_ISL_744956, EPI_ISL_744957, EPI_ISL_744959, EPI_ISL_744960, EPI_ISL_744961, EPI_ISL_744962, EPI_ISL_744963, EPI_ISL_744964, EPI_ISL_744965, EPI_ISL_744966, EPI_ISL_744967                                                                                                                                                                                                                                                                                                                                                                                                                                                                                                                                                                                                                                                                                                                                                                                                                                                                                 |                                                                                                     |                                                                                                     |                                                                                                                                                                                  |
| see above                                                                                                                                                                                                                                                                                                                                                                                                                                                                                                                                                                                                                                                                                                                                                                                                                                                                                                                                                                                                                                                                      | Laboratoire national de santé, Microbiology, Virology                                               | Laboratoire national de santé, Microbiology, Microbial Genomics Platform                            | Anke Wienecke-Baldacchino, Catherine Ragimbeau, Jessica Tapp, Fatu Djabi, Lise Pignon, Raoul Salmon, Tamir Abdelrahman                                                           |
| EPI_ISL_744968                                                                                                                                                                                                                                                                                                                                                                                                                                                                                                                                                                                                                                                                                                                                                                                                                                                                                                                                                                                                                                                                 | Laboratoire national de santé, Microbiology, Virology                                               | Laboratoire national de santé, Microbiology, Microbial Genomics Platform                            | Anke Wienecke-Baldacchino, Catherine Ragimbeau, Tamir Abdelrahman, Jessica Tapp, Fatu Djabi                                                                                      |
| EPI_ISL_744969, EPI_ISL_744970, EPI_ISL_744971, EPI_ISL_744972, EPI_ISL_744973, EPI_ISL_744974, EPI_ISL_744975, EPI_ISL_744976, EPI_ISL_744977, EPI_ISL_744978, EPI_ISL_744979, EPI_ISL_744980, EPI_ISL_744981, EPI_ISL_744982, EPI_ISL_744983, EPI_ISL_744984, EPI_ISL_744985, EPI_ISL_744986, EPI_ISL_744987, EPI_ISL_744988, EPI_ISL_744989, EPI_ISL_744990, EPI_ISL_744991, EPI_ISL_744992, EPI_ISL_744993, EPI_ISL_744994, EPI_ISL_744995, EPI_ISL_744996, EPI_ISL_744997, EPI_ISL_744998, EPI_ISL_744999, EPI_ISL_745000, EPI_ISL_745001, EPI_ISL_745002, EPI_ISL_745003, EPI_ISL_745004, EPI_ISL_745005, EPI_ISL_745006, EPI_ISL_745007, EPI_ISL_745008, EPI_ISL_745009, EPI_ISL_745010, EPI_ISL_745012                                                                                                                                                                                                                                                                                                                                                                 |                                                                                                     |                                                                                                     |                                                                                                                                                                                  |
| see above                                                                                                                                                                                                                                                                                                                                                                                                                                                                                                                                                                                                                                                                                                                                                                                                                                                                                                                                                                                                                                                                      | Laboratoire national de santé, Microbiology, Virology                                               | Laboratoire national de santé, Microbiology, Microbial Genomics Platform                            | Anke Wienecke-Baldacchino, Catherine Ragimbeau, Jessica Tapp, Fatu Djabi, Lise Pignon, Raoul Salmon, Tamir Abdelrahman                                                           |
| EPI_ISL_745013                                                                                                                                                                                                                                                                                                                                                                                                                                                                                                                                                                                                                                                                                                                                                                                                                                                                                                                                                                                                                                                                 | Laboratoire national de santé, Microbiology, Virology                                               | Laboratoire national de santé, Microbiology, Microbial Genomics Platform                            | Anke Wienecke-Baldacchino, Catherine Ragimbeau, Tamir Abdelrahman, Jessica Tapp, Fatu Djabi                                                                                      |
| EPI_ISL_745014, EPI_ISL_745015, EPI_ISL_745016, EPI_ISL_745017, EPI_ISL_745018, EPI_ISL_745019, EPI_ISL_745020, EPI_ISL_745021                                                                                                                                                                                                                                                                                                                                                                                                                                                                                                                                                                                                                                                                                                                                                                                                                                                                                                                                                 |                                                                                                     |                                                                                                     | Anke Wienecke-Baldacchino, Catherine Ragimbeau, Jessica Tapp, Fatu Djabi, Lise Pignon, Raoul Salmon, Tamir Abdelrahman                                                           |
| EPI_ISL_745022                                                                                                                                                                                                                                                                                                                                                                                                                                                                                                                                                                                                                                                                                                                                                                                                                                                                                                                                                                                                                                                                 | Laboratoire national de santé, Microbiology, Virology                                               | Laboratoire national de santé, Microbiology, Microbial Genomics Platform                            | Anke Wienecke-Baldacchino, Catherine Ragimbeau, Tamir Abdelrahman, Jessica Tapp, Fatu Djabi                                                                                      |
| EPI_ISL_745023, EPI_ISL_745025, EPI_ISL_745026, EPI_ISL_745027                                                                                                                                                                                                                                                                                                                                                                                                                                                                                                                                                                                                                                                                                                                                                                                                                                                                                                                                                                                                                 | Laboratoire national de santé, Microbiology, Virology                                               | Laboratoire national de santé, Microbiology, Microbial Genomics Platform                            | Anke Wienecke-Baldacchino, Catherine Ragimbeau, Jessica Tapp, Fatu Djabi, Lise Pignon, Raoul Salmon, Tamir Abdelrahman                                                           |
| EPI_ISL_745029, EPI_ISL_745030, EPI_ISL_745031                                                                                                                                                                                                                                                                                                                                                                                                                                                                                                                                                                                                                                                                                                                                                                                                                                                                                                                                                                                                                                 | Area of Virology, Serology and Virology Division (SAViD), New South Wales Health Pathology Randwick | Area of Virology, Serology and Virology Division (SAViD), New South Wales Health Pathology Randwick | Rawlinson, W.                                                                                                                                                                    |
| EPI_ISL_745033                                                                                                                                                                                                                                                                                                                                                                                                                                                                                                                                                                                                                                                                                                                                                                                                                                                                                                                                                                                                                                                                 | West Java Health Laboratory                                                                         | West Java Health Laboratory                                                                         | Azzania Fribrani, Ema Rahmawati, Ryan Bayusantika Ristandi, Rifky Waluyajati Rachman, Cut Nur Cinthia Alamanda, Isak Solihin, Rini Robiani, Miftahul Farid, Karimatu Khoirunnisa |
| EPI_ISL_745034, EPI_ISL_745035, EPI_ISL_745036, EPI_ISL_745037, EPI_ISL_745038, EPI_ISL_745039, EPI_ISL_745040, EPI_ISL_745041, EPI_ISL_745042, EPI_ISL_745043, EPI_ISL_745044, EPI_ISL_745045, EPI_ISL_745046, EPI_ISL_745047, EPI_ISL_745048, EPI_ISL_745049, EPI_ISL_745050, EPI_ISL_745051, EPI_ISL_745052, EPI_ISL_745053, EPI_ISL_745054, EPI_ISL_745056, EPI_ISL_745057, EPI_ISL_745058, EPI_ISL_745059, EPI_ISL_745061, EPI_ISL_745062, EPI_ISL_745063, EPI_ISL_745064, EPI_ISL_745065, EPI_ISL_745066, EPI_ISL_745067, EPI_ISL_745068, EPI_ISL_745069, EPI_ISL_745070, EPI_ISL_745071, EPI_ISL_745072, EPI_ISL_745073, EPI_ISL_745074, EPI_ISL_745075, EPI_ISL_745076, EPI_ISL_745077, EPI_ISL_745078, EPI_ISL_745079, EPI_ISL_745080, EPI_ISL_745081, EPI_ISL_745083, EPI_ISL_745084, EPI_ISL_745085, EPI_ISL_745086                                                                                                                                                                                                                                                 |                                                                                                     |                                                                                                     |                                                                                                                                                                                  |
| see above                                                                                                                                                                                                                                                                                                                                                                                                                                                                                                                                                                                                                                                                                                                                                                                                                                                                                                                                                                                                                                                                      | Israel Central Virology laboratory                                                                  | Israel Central Virology laboratory                                                                  | Neta Zuckerman, Efrat Dahan Bucris, Oran Erster, Michal Mandelboim, Orna Mor, Ella Mendelson                                                                                     |
| EPI_ISL_745091, EPI_ISL_745092                                                                                                                                                                                                                                                                                                                                                                                                                                                                                                                                                                                                                                                                                                                                                                                                                                                                                                                                                                                                                                                 | Australian Clinical Labs                                                                            | CIDM-PH, Westmead Hospital                                                                          | CIDM-PH et al.                                                                                                                                                                   |
| EPI_ISL_745093, EPI_ISL_745094                                                                                                                                                                                                                                                                                                                                                                                                                                                                                                                                                                                                                                                                                                                                                                                                                                                                                                                                                                                                                                                 | Histopath                                                                                           | CIDM-PH, Westmead Hospital                                                                          | CIDM-PH et al.                                                                                                                                                                   |
| EPI_ISL_745095                                                                                                                                                                                                                                                                                                                                                                                                                                                                                                                                                                                                                                                                                                                                                                                                                                                                                                                                                                                                                                                                 | Laverty Pathology                                                                                   | CIDM-PH, Westmead Hospital                                                                          | CIDM-PH et al.                                                                                                                                                                   |
| EPI_ISL_745096                                                                                                                                                                                                                                                                                                                                                                                                                                                                                                                                                                                                                                                                                                                                                                                                                                                                                                                                                                                                                                                                 | Pathology North - Hunter - NSW Health Pathology                                                     | CIDM-PH, Westmead Hospital                                                                          | CIDM-PH et al.                                                                                                                                                                   |
| EPI_ISL_745097, EPI_ISL_745098, EPI_ISL_745099, EPI_ISL_745100, EPI_ISL_745101, EPI_ISL_745102, EPI_ISL_745103, EPI_ISL_745104, EPI_ISL_745105, EPI_ISL_745106, EPI_ISL_745107                                                                                                                                                                                                                                                                                                                                                                                                                                                                                                                                                                                                                                                                                                                                                                                                                                                                                                 |                                                                                                     |                                                                                                     |                                                                                                                                                                                  |
| see above                                                                                                                                                                                                                                                                                                                                                                                                                                                                                                                                                                                                                                                                                                                                                                                                                                                                                                                                                                                                                                                                      | Pathology North - Royal North Shore Hospital - NSW Health                                           | CIDM-PH, Westmead Hospital                                                                          | CIDM-PH et al.                                                                                                                                                                   |

[illegible]

|                                                                                                                                                                                                                                                                                                                                                                                                                                                                                                                                                                                                                                                                                                                                                                                                                                                                                                                                                                                                                |                                                                                                  |                                                                                                                                                                                                                |                                                                                                                                                                                                                                                                                                                                                                                                   |                                                                                                                                                              |  |
|----------------------------------------------------------------------------------------------------------------------------------------------------------------------------------------------------------------------------------------------------------------------------------------------------------------------------------------------------------------------------------------------------------------------------------------------------------------------------------------------------------------------------------------------------------------------------------------------------------------------------------------------------------------------------------------------------------------------------------------------------------------------------------------------------------------------------------------------------------------------------------------------------------------------------------------------------------------------------------------------------------------|--------------------------------------------------------------------------------------------------|----------------------------------------------------------------------------------------------------------------------------------------------------------------------------------------------------------------|---------------------------------------------------------------------------------------------------------------------------------------------------------------------------------------------------------------------------------------------------------------------------------------------------------------------------------------------------------------------------------------------------|--------------------------------------------------------------------------------------------------------------------------------------------------------------|--|
| EPI_ISL_745186                                                                                                                                                                                                                                                                                                                                                                                                                                                                                                                                                                                                                                                                                                                                                                                                                                                                                                                                                                                                 | Wallacedene Clinic wc WAL                                                                        | National Health Laboratory Service (NHLS), Tygerberg                                                                                                                                                           | Susan Engelbrecht, Kayla Delaney, Bronwyn Kleinhans, Houriyah Tegally, Eduan Wilkindon, Gert van Zyl, Wolfgang Preiser, Tulio de Oliveira                                                                                                                                                                                                                                                         |                                                                                                                                                              |  |
| EPI_ISL_745187                                                                                                                                                                                                                                                                                                                                                                                                                                                                                                                                                                                                                                                                                                                                                                                                                                                                                                                                                                                                 | Port Nolloth Hospital                                                                            | National Health Laboratory Service (NHLS), Tygerberg                                                                                                                                                           | Susan Engelbrecht, Kayla Delaney, Bronwyn Kleinhans, Houriyah Tegally, Eduan Wilkindon, Gert van Zyl, Wolfgang Preiser, Tulio de Oliveira                                                                                                                                                                                                                                                         |                                                                                                                                                              |  |
| EPI_ISL_745188                                                                                                                                                                                                                                                                                                                                                                                                                                                                                                                                                                                                                                                                                                                                                                                                                                                                                                                                                                                                 | Nababeep Hospital                                                                                | National Health Laboratory Service (NHLS), Tygerberg                                                                                                                                                           | Susan Engelbrecht, Kayla Delaney, Bronwyn Kleinhans, Houriyah Tegally, Eduan Wilkindon, Gert van Zyl, Wolfgang Preiser, Tulio de Oliveira                                                                                                                                                                                                                                                         |                                                                                                                                                              |  |
| EPI_ISL_745189                                                                                                                                                                                                                                                                                                                                                                                                                                                                                                                                                                                                                                                                                                                                                                                                                                                                                                                                                                                                 | Vredenburg Hospital wc VBG                                                                       | National Health Laboratory Service (NHLS), Tygerberg                                                                                                                                                           | Susan Engelbrecht, Kayla Delaney, Bronwyn Kleinhans, Houriyah Tegally, Eduan Wilkindon, Gert van Zyl, Wolfgang Preiser, Tulio de Oliveira                                                                                                                                                                                                                                                         |                                                                                                                                                              |  |
| EPI_ISL_745190                                                                                                                                                                                                                                                                                                                                                                                                                                                                                                                                                                                                                                                                                                                                                                                                                                                                                                                                                                                                 | Brackengate Field Hospital COVID-19 wc BRG                                                       | National Health Laboratory Service (NHLS), Tygerberg                                                                                                                                                           | Susan Engelbrecht, Kayla Delaney, Bronwyn Kleinhans, Houriyah Tegally, Eduan Wilkindon, Gert van Zyl, Wolfgang Preiser, Tulio de Oliveira                                                                                                                                                                                                                                                         |                                                                                                                                                              |  |
| EPI_ISL_745192                                                                                                                                                                                                                                                                                                                                                                                                                                                                                                                                                                                                                                                                                                                                                                                                                                                                                                                                                                                                 | Ospedale Di Venere                                                                               | Istituto Zooprofilattico Sperimentale della Puglia e della Basilicata                                                                                                                                          | Parisi A., Capozzi L., Del Sambro L., Bianco A., Chiara M., Pesole G., De Sabato L., Iacobellis M.                                                                                                                                                                                                                                                                                                |                                                                                                                                                              |  |
| EPI_ISL_745193                                                                                                                                                                                                                                                                                                                                                                                                                                                                                                                                                                                                                                                                                                                                                                                                                                                                                                                                                                                                 | Ospedale Di Venere                                                                               | Istituto Zooprofilattico Sperimentale della Puglia e della Basilicata                                                                                                                                          | Parisi A., Bianco A., Capozzi L., Del Sambro L., Chiara M., De Sabato L., Pesole G., Iacobellis M                                                                                                                                                                                                                                                                                                 |                                                                                                                                                              |  |
| EPI_ISL_745194, EPI_ISL_745196                                                                                                                                                                                                                                                                                                                                                                                                                                                                                                                                                                                                                                                                                                                                                                                                                                                                                                                                                                                 | Osmania Medical College                                                                          | CSIR-Centre for Cellular and Molecular Biology                                                                                                                                                                 | Dr.V.Sudha Rani,Dr.S.Pavani,Dr.Satyaprasad,Dr.P.Shashikala Reddy,Namami Gaur,Sakshi Shambhavi,Lamuk Zaveri,Shagufta Khan,Nikhil Hajirnis,M Soujanya Reddy,Pratheusa Maccha,Tulasi Nagabandi,Purushotham Vodnala,Blessy B John,Viswagithe S L,B Himasri,Onkar Kulkarni,Payel Mukherjee,Sofia Banu,Priya Singh,Archana Bharadwaj Siva,Karthik Bharadwaj Tallapaka,Rakesh K Mishra,Divya Tej Sowpati |                                                                                                                                                              |  |
| EPI_ISL_745197                                                                                                                                                                                                                                                                                                                                                                                                                                                                                                                                                                                                                                                                                                                                                                                                                                                                                                                                                                                                 | Kakatiya Medical College                                                                         | CSIR-Centre for Cellular and Molecular Biology                                                                                                                                                                 | Dr.V.Sudha Rani,Dr.S.Pavani,Dr.Satyaprasad,Dr.P.Shashikala Reddy,Namami Gaur,Sakshi Shambhavi,Lamuk Zaveri,Shagufta Khan,Nikhil Hajirnis,M Soujanya Reddy,Pratheusa Maccha,Tulasi Nagabandi,Purushotham Vodnala,Blessy B John,Viswagithe S L,B Himasri,Onkar Kulkarni,Payel Mukherjee,Sofia Banu,Priya Singh,Archana Bharadwaj Siva,Karthik Bharadwaj Tallapaka,Rakesh K Mishra,Divya Tej Sowpati |                                                                                                                                                              |  |
| EPI_ISL_745198                                                                                                                                                                                                                                                                                                                                                                                                                                                                                                                                                                                                                                                                                                                                                                                                                                                                                                                                                                                                 | ESI Hospital                                                                                     | CSIR-Centre for Cellular and Molecular Biology                                                                                                                                                                 | Dr.V.Sudha Rani,Dr.S.Pavani,Dr.Satyaprasad,Dr.P.Shashikala Reddy,Namami Gaur,Sakshi Shambhavi,Lamuk Zaveri,Shagufta Khan,Nikhil Hajirnis,M Soujanya Reddy,Pratheusa Maccha,Tulasi Nagabandi,Purushotham Vodnala,Blessy B John,Viswagithe S L,B Himasri,Onkar Kulkarni,Payel Mukherjee,Sofia Banu,Priya Singh,Archana Bharadwaj Siva,Karthik Bharadwaj Tallapaka,Rakesh K Mishra,Divya Tej Sowpati |                                                                                                                                                              |  |
| EPI_ISL_745199                                                                                                                                                                                                                                                                                                                                                                                                                                                                                                                                                                                                                                                                                                                                                                                                                                                                                                                                                                                                 | Rangaraya Medical College                                                                        | CSIR-Centre for Cellular and Molecular Biology                                                                                                                                                                 | Dr.V.Sudha Rani,Dr.S.Pavani,Dr.Satyaprasad,Dr.P.Shashikala Reddy,Namami Gaur,Sakshi Shambhavi,Lamuk Zaveri,Shagufta Khan,Nikhil Hajirnis,M Soujanya Reddy,Pratheusa Maccha,Tulasi Nagabandi,Purushotham Vodnala,Blessy B John,Viswagithe S L,B Himasri,Onkar Kulkarni,Payel Mukherjee,Sofia Banu,Priya Singh,Archana Bharadwaj Siva,Karthik Bharadwaj Tallapaka,Rakesh K Mishra,Divya Tej Sowpati |                                                                                                                                                              |  |
| EPI_ISL_745200                                                                                                                                                                                                                                                                                                                                                                                                                                                                                                                                                                                                                                                                                                                                                                                                                                                                                                                                                                                                 | Nizams Institute of Medical Sciences                                                             | CSIR-Centre for Cellular and Molecular Biology                                                                                                                                                                 | Dr.V.Sudha Rani,Dr.S.Pavani,Dr.Satyaprasad,Dr.P.Shashikala Reddy,Namami Gaur,Sakshi Shambhavi,Lamuk Zaveri,Shagufta Khan,Nikhil Hajirnis,M Soujanya Reddy,Pratheusa Maccha,Tulasi Nagabandi,Purushotham Vodnala,Blessy B John,Viswagithe S L,B Himasri,Onkar Kulkarni,Payel Mukherjee,Sofia Banu,Priya Singh,Archana Bharadwaj Siva,Karthik Bharadwaj Tallapaka,Rakesh K Mishra,Divya Tej Sowpati |                                                                                                                                                              |  |
| EPI_ISL_745201                                                                                                                                                                                                                                                                                                                                                                                                                                                                                                                                                                                                                                                                                                                                                                                                                                                                                                                                                                                                 | Guntur General Hospital                                                                          | CSIR-Centre for Cellular and Molecular Biology                                                                                                                                                                 | Dr.V.Sudha Rani,Dr.S.Pavani,Dr.Satyaprasad,Dr.P.Shashikala Reddy,Namami Gaur,Sakshi Shambhavi,Lamuk Zaveri,Shagufta Khan,Nikhil Hajirnis,M Soujanya Reddy,Pratheusa Maccha,Tulasi Nagabandi,Purushotham Vodnala,Blessy B John,Viswagithe S L,B Himasri,Onkar Kulkarni,Payel Mukherjee,Sofia Banu,Priya Singh,Archana Bharadwaj Siva,Karthik Bharadwaj Tallapaka,Rakesh K Mishra,Divya Tej Sowpati |                                                                                                                                                              |  |
| EPI_ISL_745202, EPI_ISL_745203, EPI_ISL_745204, EPI_ISL_745205, EPI_ISL_745206, EPI_ISL_745207, EPI_ISL_745209, EPI_ISL_745210, EPI_ISL_745211                                                                                                                                                                                                                                                                                                                                                                                                                                                                                                                                                                                                                                                                                                                                                                                                                                                                 | Lab voor klinische biologie                                                                      | Onderzoeksgroep Virologie                                                                                                                                                                                      | Laurens Lambrechts, Nick Vereecke, Marthe Pauwels, Bruno Verhasselt, Linos Vandekerckhove, Hans Nauwynck, Sebastiaan Theuns                                                                                                                                                                                                                                                                       |                                                                                                                                                              |  |
| EPI_ISL_745212, EPI_ISL_745214, EPI_ISL_745215, EPI_ISL_745216, EPI_ISL_745217, EPI_ISL_745218, EPI_ISL_745219, EPI_ISL_745220                                                                                                                                                                                                                                                                                                                                                                                                                                                                                                                                                                                                                                                                                                                                                                                                                                                                                 | Lab voor klinische biologie                                                                      | Onderzoeksgroep Virologie                                                                                                                                                                                      | Nick Vereecke, Laurens Lambrechts, Marthe Pauwels, Bruno Verhasselt, Linos Vandekerckhove, Hans Nauwynck, Sebastiaan Theuns                                                                                                                                                                                                                                                                       |                                                                                                                                                              |  |
| EPI_ISL_745222                                                                                                                                                                                                                                                                                                                                                                                                                                                                                                                                                                                                                                                                                                                                                                                                                                                                                                                                                                                                 | UZ Leuven, National Reference Laboratory for Coronaviruses, Laboratory Medicine, Leuven, Belgium | KU Leuven, Rega Institute, Clinical and Epidemiological Virology                                                                                                                                               | Tony Wawina-Bokalanga, Joan Marti-Carerras, Bert Vanmechelen, Piet Maes                                                                                                                                                                                                                                                                                                                           |                                                                                                                                                              |  |
| EPI_ISL_745223, EPI_ISL_745224, EPI_ISL_745225, EPI_ISL_745226, EPI_ISL_745227, EPI_ISL_745228, EPI_ISL_745229, EPI_ISL_745230, EPI_ISL_745231, EPI_ISL_745232, EPI_ISL_745233, EPI_ISL_745234, EPI_ISL_745235, EPI_ISL_745236, EPI_ISL_745237, EPI_ISL_745238, EPI_ISL_745239, EPI_ISL_745240, EPI_ISL_745241, EPI_ISL_745242, EPI_ISL_745243, EPI_ISL_745244, EPI_ISL_745245, EPI_ISL_745246, EPI_ISL_745247, EPI_ISL_745248, EPI_ISL_745249, EPI_ISL_745250, EPI_ISL_745251, EPI_ISL_745252, EPI_ISL_745253, EPI_ISL_745254, EPI_ISL_745255, EPI_ISL_745256, EPI_ISL_745257, EPI_ISL_745258, EPI_ISL_745259                                                                                                                                                                                                                                                                                                                                                                                                 | see above                                                                                        | Molecular diagnostic laboratory of Federal Budget Institution of Science "Central Research Institute of Epidemiology" of The Federal Service on Customers' Rights Protection and Human Well-being Surveillance | Group of Genomics and Postgenomic Technologies of Central Research Institute of Epidemiology                                                                                                                                                                                                                                                                                                      | Samoilov AE, Kaptelova VV, Korneenko EV, Dudorova AV, Saenko SS, Speranskaya AS, Tivanova EV, Shipulina OY, Akimkin VG                                       |  |
| EPI_ISL_745260                                                                                                                                                                                                                                                                                                                                                                                                                                                                                                                                                                                                                                                                                                                                                                                                                                                                                                                                                                                                 | CHUM-Site Glen-LAB Microbiologie                                                                 | Laboratoire de santé publique du Québec                                                                                                                                                                        | Sandrine Moreira, Ioannis Ragoussis, Guillaume Bourque, Jesse Shapiro, Mark Lathrop and Michel Roger on behalf of the CoVSeQ research group ( <a href="http://covseq.ca/researchgroup">http://covseq.ca/researchgroup</a> )                                                                                                                                                                       |                                                                                                                                                              |  |
| EPI_ISL_745261, EPI_ISL_745262, EPI_ISL_745263, EPI_ISL_745264, EPI_ISL_745265, EPI_ISL_745266, EPI_ISL_745267, EPI_ISL_745268, EPI_ISL_745269, EPI_ISL_745270, EPI_ISL_745271, EPI_ISL_745272, EPI_ISL_745273, EPI_ISL_745274, EPI_ISL_745276, EPI_ISL_745277, EPI_ISL_745278, EPI_ISL_745279, EPI_ISL_745280, EPI_ISL_745281, EPI_ISL_745282, EPI_ISL_745283, EPI_ISL_745284, EPI_ISL_745285, EPI_ISL_745286, EPI_ISL_745287, EPI_ISL_745288, EPI_ISL_745289, EPI_ISL_745290, EPI_ISL_745291, EPI_ISL_745292, EPI_ISL_745293, EPI_ISL_745294, EPI_ISL_745295, EPI_ISL_745296, EPI_ISL_745297, EPI_ISL_745298, EPI_ISL_745299, EPI_ISL_745300, EPI_ISL_745301, EPI_ISL_745302, EPI_ISL_745303, EPI_ISL_745304, EPI_ISL_745305, EPI_ISL_745306                                                                                                                                                                                                                                                                 | see above                                                                                        | Texas Department of State Health Services                                                                                                                                                                      | Texas Department of State Health Services                                                                                                                                                                                                                                                                                                                                                         | Rashmi Tuladhar, Bonnie Oh, Jenny Zhang, Maliha Rahman, Anita Pokharel, Myong Koag, Chung Wang, Rachel Lee, Grace Kubin, Mayela Pedruza, James Daniel Bonser |  |
| EPI_ISL_745307, EPI_ISL_745308, EPI_ISL_745309, EPI_ISL_745310, EPI_ISL_745311                                                                                                                                                                                                                                                                                                                                                                                                                                                                                                                                                                                                                                                                                                                                                                                                                                                                                                                                 | CNR Virus des Infections Respiratoires - France SUD                                              | CNR Virus des Infections Respiratoires - France SUD                                                                                                                                                            | Antonin Bal, Gregory Destras, Claudia Gonzalez, Gwendolyne Burfin, Quentin Semanas, Martine Valette, Bruno Lina, Laurence Josset                                                                                                                                                                                                                                                                  |                                                                                                                                                              |  |
| EPI_ISL_745312, EPI_ISL_745313, EPI_ISL_745314, EPI_ISL_745315                                                                                                                                                                                                                                                                                                                                                                                                                                                                                                                                                                                                                                                                                                                                                                                                                                                                                                                                                 | CHU Clermont-Ferrand                                                                             | CNR Virus des Infections Respiratoires - France SUD                                                                                                                                                            | Antonin Bal, Gregory Destras, Gwendolyne Burfin, Hadrien Règue, Quentin Semanas, Martine Valette, Bruno Lina, Christine Archimbaud, Amélie Brebion, Hélène Chabrolles, Martine Chambon, Audrey Mirand, Christel Regagnon, Maxime Bisseux, Patricia Combes, Cécile Henquell, Laurence Josset                                                                                                       |                                                                                                                                                              |  |
| EPI_ISL_745316, EPI_ISL_745317, EPI_ISL_745318, EPI_ISL_745319, EPI_ISL_745320, EPI_ISL_745321, EPI_ISL_745322, EPI_ISL_745323, EPI_ISL_745324, EPI_ISL_745325, EPI_ISL_745326, EPI_ISL_745327, EPI_ISL_745328, EPI_ISL_745329, EPI_ISL_745330, EPI_ISL_745331, EPI_ISL_745332, EPI_ISL_745333, EPI_ISL_745334                                                                                                                                                                                                                                                                                                                                                                                                                                                                                                                                                                                                                                                                                                 | see above                                                                                        | CNR Virus des Infections Respiratoires - France SUD                                                                                                                                                            | CNR Virus des Infections Respiratoires - France SUD                                                                                                                                                                                                                                                                                                                                               | Antonin Bal, Gregory Destras, Claudia Gonzalez, Gwendolyne Burfin, Quentin Semanas, Martine Valette, Bruno Lina, Laurence Josset                             |  |
| EPI_ISL_745335, EPI_ISL_745336                                                                                                                                                                                                                                                                                                                                                                                                                                                                                                                                                                                                                                                                                                                                                                                                                                                                                                                                                                                 | CHU Clermont-Ferrand                                                                             | CNR Virus des Infections Respiratoires - France SUD                                                                                                                                                            | Antonin Bal, Gregory Destras, Gwendolyne Burfin, Hadrien Règue, Quentin Semanas, Martine Valette, Bruno Lina, Christine Archimbaud, Amélie Brebion, Hélène Chabrolles, Martine Chambon, Audrey Mirand, Christel Regagnon, Maxime Bisseux, Patricia Combes, Cécile Henquell, Laurence Josset                                                                                                       |                                                                                                                                                              |  |
| EPI_ISL_745337, EPI_ISL_745338, EPI_ISL_745339, EPI_ISL_745340, EPI_ISL_745341, EPI_ISL_745342, EPI_ISL_745343, EPI_ISL_745344, EPI_ISL_745345, EPI_ISL_745346, EPI_ISL_745347, EPI_ISL_745348, EPI_ISL_745349, EPI_ISL_745350, EPI_ISL_745351, EPI_ISL_745352, EPI_ISL_745353, EPI_ISL_745354, EPI_ISL_745355, EPI_ISL_745356, EPI_ISL_745357, EPI_ISL_745358, EPI_ISL_745359, EPI_ISL_745360, EPI_ISL_745361, EPI_ISL_745362, EPI_ISL_745363, EPI_ISL_745364, EPI_ISL_745365, EPI_ISL_745366, EPI_ISL_745367, EPI_ISL_745368, EPI_ISL_745369, EPI_ISL_745370, EPI_ISL_745371, EPI_ISL_745372, EPI_ISL_745373, EPI_ISL_745374, EPI_ISL_745375, EPI_ISL_745376, EPI_ISL_745377, EPI_ISL_745378, EPI_ISL_745379, EPI_ISL_745380, EPI_ISL_745381, EPI_ISL_745382, EPI_ISL_745383, EPI_ISL_745384, EPI_ISL_745385, EPI_ISL_745386, EPI_ISL_745387, EPI_ISL_745388, EPI_ISL_745389, EPI_ISL_745390, EPI_ISL_745391, EPI_ISL_745392, EPI_ISL_745393, EPI_ISL_745394, EPI_ISL_745395, EPI_ISL_745396, EPI_ISL_745397 | see above                                                                                        | CNR Virus des Infections Respiratoires - France SUD                                                                                                                                                            | CNR Virus des Infections Respiratoires - France SUD                                                                                                                                                                                                                                                                                                                                               | Antonin Bal, Gregory Destras, Claudia Gonzalez, Gwendolyne Burfin, Quentin Semanas, Martine Valette, Bruno Lina, Laurence Josset                             |  |
| EPI_ISL_745398                                                                                                                                                                                                                                                                                                                                                                                                                                                                                                                                                                                                                                                                                                                                                                                                                                                                                                                                                                                                 | DOHMH Jamaica                                                                                    | New York City Public Health Laboratory                                                                                                                                                                         | Jade Wang, et al.                                                                                                                                                                                                                                                                                                                                                                                 |                                                                                                                                                              |  |
| EPI_ISL_745399                                                                                                                                                                                                                                                                                                                                                                                                                                                                                                                                                                                                                                                                                                                                                                                                                                                                                                                                                                                                 | DOHMH Morrisania                                                                                 | New York City Public Health Laboratory                                                                                                                                                                         | Jade Wang, et al.                                                                                                                                                                                                                                                                                                                                                                                 |                                                                                                                                                              |  |
| EPI_ISL_745400                                                                                                                                                                                                                                                                                                                                                                                                                                                                                                                                                                                                                                                                                                                                                                                                                                                                                                                                                                                                 | DOHMH Central Harlem                                                                             | New York City Public Health Laboratory                                                                                                                                                                         | Jade Wang, et al.                                                                                                                                                                                                                                                                                                                                                                                 |                                                                                                                                                              |  |
| EPI_ISL_745401                                                                                                                                                                                                                                                                                                                                                                                                                                                                                                                                                                                                                                                                                                                                                                                                                                                                                                                                                                                                 | DOHMH Corona                                                                                     | New York City Public Health Laboratory                                                                                                                                                                         | Jade Wang, et al.                                                                                                                                                                                                                                                                                                                                                                                 |                                                                                                                                                              |  |

[illegible]

|                |                                     |                               |                                                                                                                                                                                                                                                                                                                                         |
|----------------|-------------------------------------|-------------------------------|-----------------------------------------------------------------------------------------------------------------------------------------------------------------------------------------------------------------------------------------------------------------------------------------------------------------------------------------|
| see above      | Ginkgo Bioworks Clinical Laboratory | Utah Public Health Laboratory | Erin L. Young, Kelly Oakeson, Tara Gallagher, Michael T. Pyne, E. Susan Slechta, Melanie A. Mallory, Jeffrey B. Stevenson, Salika M. Shakir, David R. Hillyard, Malaika McKenzie-Bennett, James McGann, Jim Griffin, Keith Robison, Alex Plocik, Becky Schilling, Martha Pierson, Rebecca Littlefield, Michelle Spencer, Birgitte Simen |
| EPI_ISL_746319 | Genome Center                       | Genome Center                 | Md. Shazid Hasan, Hassan M. Al-Emran, Ovinu Kibria Islam, A. S. M. Rubayet- Ul- Alam, Selina Akter, Md. Tanvir Islam, Pravas Chandra Roy, Shovon Lal Sarkar, Najmuj Sakib, Nigar Sultana Meghla, S. M. Tanjil Shah, Shireen Nigar, Md. Iqbal Kabir Jahid, Md. Anwar Hossain                                                             |
| EPI_ISL_746323 | Genome Center                       | Genome Center                 | Ovinu Kibria Islam, Hassan M. Al-Emran, A. S. M. Rubayet- Ul- Alam, Md. Shazid Hasan, Selina Akter, Md. Tanvir Islam, Pravas Chandra Roy, Shovon Lal Sarkar, Najmuj Sakib, Nigar Sultana Meghla, S. M. Tanjil Shah, Shireen Nigar, Md. Iqbal Kabir Jahid, Md. Anwar Hossain                                                             |
| EPI_ISL_746324 | Genome Center                       | Genome Center                 | A. S. M. Rubayet- Ul- Alam, Ovinu Kibria Islam, Hassan M. Al-Emran, Md. Shazid Hasan, Selina Akter, Md. Tanvir Islam, Pravas Chandra Roy, Shovon Lal Sarkar, Najmuj Sakib, Nigar Sultana Meghla, S. M. Tanjil Shah, Shireen Nigar, Md. Iqbal Kabir Jahid, Md. Anwar Hossain                                                             |

[illegible]

|                |                                                                          |                                                                          |                                                                                                                                                 |
|----------------|--------------------------------------------------------------------------|--------------------------------------------------------------------------|-------------------------------------------------------------------------------------------------------------------------------------------------|
| see above      | Genetica Molecular and Subdepartamento de Virologia ISP Chile            | Instituto de Salud Publica de Chile                                      | Javier Tognarelli, Barbara Parra, Loredana Arata, Jaime Lagos, Gisselle Barra, Patricia Bustos, Rodrigo Fasce, Andres Castillo, Jorge Fernandez |
| EPI_ISL_746826 | National Institute for Infectious Diseases, INMI, "L. Spallanzani" IRCCS | National Institute for Infectious Diseases, INMI, "L. Spallanzani" IRCCS | C.E.M Gruber, B Bartolini, M Rueca, F Messina, E Giombini, A Di Caro, MR Capobianchi                                                            |
| EPI_ISL_746827 | National Institute for Infectious Diseases, INMI, "L. Spallanzani" IRCCS | National Institute for Infectious Diseases, INMI, "L. Spallanzani" IRCCS | B Bartolini, C.E.M Gruber, M Rueca, F Messina, E Giombini, MR Capobianchi, A Di Caro                                                            |
| EPI_ISL_746828 | National Institute for Infectious Diseases, INMI, "L. Spallanzani" IRCCS | National Institute for Infectious Diseases, INMI, "L. Spallanzani" IRCCS | M Rueca, B Bartolini, C.E.M Gruber, F Messina, E Giombini, A Di Caro, MR Capobianchi                                                            |
| EPI_ISL_746829 | National Institute for Infectious Diseases, INMI, "L. Spallanzani" IRCCS | National Institute for Infectious Diseases, INMI, "L. Spallanzani" IRCCS | F Messina, E Giombini, M Rueca, B Bartolini, C.E.M Gruber, MR Capobianchi, A Di Caro                                                            |
| EPI_ISL_746830 | National Institute for Infectious Diseases, INMI, "L. Spallanzani" IRCCS | National Institute for Infectious Diseases, INMI, "L. Spallanzani" IRCCS | E Giombini, M Rueca, B Bartolini, C.E.M Gruber, F Messina, A Di Caro, MR Capobianchi                                                            |
| EPI_ISL_746831 | National Institute for Infectious Diseases, INMI, "L. Spallanzani" IRCCS | National Institute for Infectious Diseases, INMI, "L. Spallanzani" IRCCS | C.E.M Gruber, F Messina, M Rueca, B Bartolini, E Giombini, MR Capobianchi, A Di Caro                                                            |
| EPI_ISL_746832 | National Institute for Infectious Diseases, INMI, "L.                    | National Institute for Infectious Diseases, INMI, "L.                    | E Giombini, C.E.M Gruber, M Rueca, B Bartolini, F Messina, A Di Caro, MR Capobianchi                                                            |

|                                                                                                                                                                                                                                                                                                                                                                                                                                                                                                                                                                                                                                                                                                                                                                                                                                                                                                                                                                                                                                                                                                                                                                                                                                                                                                                                                                                                                                                                                                                                                                                                                                                                                                                                                                                                                                                                                                                                                                                                                                                                                                                                                                                                                                                                                                                                                                                                                                                                                                                                                                                                                                                                                                                                                                                                                                                                                                                |                                                                                                                                        |                                                                                                                                        |                                                                                                                                                                                  |
|----------------------------------------------------------------------------------------------------------------------------------------------------------------------------------------------------------------------------------------------------------------------------------------------------------------------------------------------------------------------------------------------------------------------------------------------------------------------------------------------------------------------------------------------------------------------------------------------------------------------------------------------------------------------------------------------------------------------------------------------------------------------------------------------------------------------------------------------------------------------------------------------------------------------------------------------------------------------------------------------------------------------------------------------------------------------------------------------------------------------------------------------------------------------------------------------------------------------------------------------------------------------------------------------------------------------------------------------------------------------------------------------------------------------------------------------------------------------------------------------------------------------------------------------------------------------------------------------------------------------------------------------------------------------------------------------------------------------------------------------------------------------------------------------------------------------------------------------------------------------------------------------------------------------------------------------------------------------------------------------------------------------------------------------------------------------------------------------------------------------------------------------------------------------------------------------------------------------------------------------------------------------------------------------------------------------------------------------------------------------------------------------------------------------------------------------------------------------------------------------------------------------------------------------------------------------------------------------------------------------------------------------------------------------------------------------------------------------------------------------------------------------------------------------------------------------------------------------------------------------------------------------------------------|----------------------------------------------------------------------------------------------------------------------------------------|----------------------------------------------------------------------------------------------------------------------------------------|----------------------------------------------------------------------------------------------------------------------------------------------------------------------------------|
|                                                                                                                                                                                                                                                                                                                                                                                                                                                                                                                                                                                                                                                                                                                                                                                                                                                                                                                                                                                                                                                                                                                                                                                                                                                                                                                                                                                                                                                                                                                                                                                                                                                                                                                                                                                                                                                                                                                                                                                                                                                                                                                                                                                                                                                                                                                                                                                                                                                                                                                                                                                                                                                                                                                                                                                                                                                                                                                | Spallanzani" IRCCS                                                                                                                     | Spallanzani" IRCCS                                                                                                                     |                                                                                                                                                                                  |
| EPI_ISL_746833                                                                                                                                                                                                                                                                                                                                                                                                                                                                                                                                                                                                                                                                                                                                                                                                                                                                                                                                                                                                                                                                                                                                                                                                                                                                                                                                                                                                                                                                                                                                                                                                                                                                                                                                                                                                                                                                                                                                                                                                                                                                                                                                                                                                                                                                                                                                                                                                                                                                                                                                                                                                                                                                                                                                                                                                                                                                                                 | National Institute for Infectious Diseases, INMI, "L. Spallanzani" IRCCS                                                               | National Institute for Infectious Diseases, INMI, "L. Spallanzani" IRCCS                                                               | F Messina, M Rueca, B Bartolini, C.E.M Gruber, E Giombini, MR Capobianchi, A Di Caro                                                                                             |
| EPI_ISL_746834                                                                                                                                                                                                                                                                                                                                                                                                                                                                                                                                                                                                                                                                                                                                                                                                                                                                                                                                                                                                                                                                                                                                                                                                                                                                                                                                                                                                                                                                                                                                                                                                                                                                                                                                                                                                                                                                                                                                                                                                                                                                                                                                                                                                                                                                                                                                                                                                                                                                                                                                                                                                                                                                                                                                                                                                                                                                                                 | National Institute for Infectious Diseases, INMI, "L. Spallanzani" IRCCS                                                               | National Institute for Infectious Diseases, INMI, "L. Spallanzani" IRCCS                                                               | B Bartolini, M Rueca, C.E.M Gruber, F Messina, E Giombini, A Di Caro, MR Capobianchi                                                                                             |
| EPI_ISL_746835                                                                                                                                                                                                                                                                                                                                                                                                                                                                                                                                                                                                                                                                                                                                                                                                                                                                                                                                                                                                                                                                                                                                                                                                                                                                                                                                                                                                                                                                                                                                                                                                                                                                                                                                                                                                                                                                                                                                                                                                                                                                                                                                                                                                                                                                                                                                                                                                                                                                                                                                                                                                                                                                                                                                                                                                                                                                                                 | National Institute for Infectious Diseases, INMI, "L. Spallanzani" IRCCS                                                               | National Institute for Infectious Diseases, INMI, "L. Spallanzani" IRCCS                                                               | M Rueca, E Giombini, B Bartolini, C.E.M Gruber, F Messina, A Di Caro, MR Capobianchi                                                                                             |
| EPI_ISL_746836, EPI_ISL_746837, EPI_ISL_746838, EPI_ISL_746839, EPI_ISL_746840, EPI_ISL_746841, EPI_ISL_746842, EPI_ISL_746843, EPI_ISL_746844, EPI_ISL_746845, EPI_ISL_746846, EPI_ISL_746847, EPI_ISL_746848, EPI_ISL_746849, EPI_ISL_746850, EPI_ISL_746851, EPI_ISL_746852, EPI_ISL_746853, EPI_ISL_746854, EPI_ISL_746855, EPI_ISL_746856, EPI_ISL_746857, EPI_ISL_746858, EPI_ISL_746859, EPI_ISL_746860, EPI_ISL_746861, EPI_ISL_746862, EPI_ISL_746863, EPI_ISL_746864, EPI_ISL_746865, EPI_ISL_746866, EPI_ISL_746867, EPI_ISL_746868, EPI_ISL_746869, EPI_ISL_746870, EPI_ISL_746871, EPI_ISL_746872, EPI_ISL_746873, EPI_ISL_746874, EPI_ISL_746875, EPI_ISL_746876, EPI_ISL_746877, EPI_ISL_746878, EPI_ISL_746879, EPI_ISL_746880, EPI_ISL_746881, EPI_ISL_746882, EPI_ISL_746883, EPI_ISL_746884, EPI_ISL_746885, EPI_ISL_746886, EPI_ISL_746887, EPI_ISL_746888, EPI_ISL_746889, EPI_ISL_746890, EPI_ISL_746891, EPI_ISL_746892, EPI_ISL_746893, EPI_ISL_746894, EPI_ISL_746895, EPI_ISL_746896, EPI_ISL_746897, EPI_ISL_746898, EPI_ISL_746899, EPI_ISL_746900, EPI_ISL_746901, EPI_ISL_746902, EPI_ISL_746903, EPI_ISL_746904, EPI_ISL_746905, EPI_ISL_746906, EPI_ISL_746907, EPI_ISL_746908, EPI_ISL_746909, EPI_ISL_746910, EPI_ISL_746911, EPI_ISL_746912, EPI_ISL_746913, EPI_ISL_746914, EPI_ISL_746915, EPI_ISL_746916, EPI_ISL_746917, EPI_ISL_746918, EPI_ISL_746919, EPI_ISL_746920, EPI_ISL_746921, EPI_ISL_746922, EPI_ISL_746923, EPI_ISL_746924, EPI_ISL_746925, EPI_ISL_746926, EPI_ISL_746927, EPI_ISL_746928, EPI_ISL_746929, EPI_ISL_746930, EPI_ISL_746931                                                                                                                                                                                                                                                                                                                                                                                                                                                                                                                                                                                                                                                                                                                                                                                                                                                                                                                                                                                                                                                                                                                                                                                                                                                                                                                 |                                                                                                                                        |                                                                                                                                        |                                                                                                                                                                                  |
| see above                                                                                                                                                                                                                                                                                                                                                                                                                                                                                                                                                                                                                                                                                                                                                                                                                                                                                                                                                                                                                                                                                                                                                                                                                                                                                                                                                                                                                                                                                                                                                                                                                                                                                                                                                                                                                                                                                                                                                                                                                                                                                                                                                                                                                                                                                                                                                                                                                                                                                                                                                                                                                                                                                                                                                                                                                                                                                                      | Utah Public Health Laboratory                                                                                                          | Utah Public Health Laboratory                                                                                                          | Erin Young, Kelly Oakeson, Tara Gallagher                                                                                                                                        |
| EPI_ISL_747032, EPI_ISL_747033, EPI_ISL_747034, EPI_ISL_747035, EPI_ISL_747036, EPI_ISL_747038, EPI_ISL_747039, EPI_ISL_747040, EPI_ISL_747041, EPI_ISL_747042, EPI_ISL_747043, EPI_ISL_747044, EPI_ISL_747045, EPI_ISL_747046, EPI_ISL_747047, EPI_ISL_747048, EPI_ISL_747049, EPI_ISL_747050, EPI_ISL_747051, EPI_ISL_747052, EPI_ISL_747053, EPI_ISL_747054, EPI_ISL_747055, EPI_ISL_747056, EPI_ISL_747057, EPI_ISL_747058, EPI_ISL_747059, EPI_ISL_747060, EPI_ISL_747061, EPI_ISL_747062, EPI_ISL_747063, EPI_ISL_747065, EPI_ISL_747066, EPI_ISL_747067, EPI_ISL_747068, EPI_ISL_747069, EPI_ISL_747070, EPI_ISL_747071, EPI_ISL_747072, EPI_ISL_747073, EPI_ISL_747074, EPI_ISL_747075, EPI_ISL_747076, EPI_ISL_747077, EPI_ISL_747078, EPI_ISL_747079, EPI_ISL_747080, EPI_ISL_747081, EPI_ISL_747082, EPI_ISL_747083, EPI_ISL_747084, EPI_ISL_747085, EPI_ISL_747086, EPI_ISL_747087, EPI_ISL_747088, EPI_ISL_747089, EPI_ISL_747090, EPI_ISL_747091, EPI_ISL_747092, EPI_ISL_747093, EPI_ISL_747094, EPI_ISL_747095, EPI_ISL_747096, EPI_ISL_747097, EPI_ISL_747098, EPI_ISL_747099, EPI_ISL_747100, EPI_ISL_747101, EPI_ISL_747102, EPI_ISL_747103, EPI_ISL_747104, EPI_ISL_747105, EPI_ISL_747106, EPI_ISL_747107, EPI_ISL_747108, EPI_ISL_747109, EPI_ISL_747110, EPI_ISL_747111, EPI_ISL_747112, EPI_ISL_747113, EPI_ISL_747114, EPI_ISL_747115, EPI_ISL_747116, EPI_ISL_747117, EPI_ISL_747118, EPI_ISL_747119, EPI_ISL_747120, EPI_ISL_747121, EPI_ISL_747122, EPI_ISL_747123, EPI_ISL_747124, EPI_ISL_747125, EPI_ISL_747126, EPI_ISL_747127, EPI_ISL_747128, EPI_ISL_747129, EPI_ISL_747130, EPI_ISL_747131, EPI_ISL_747132, EPI_ISL_747133, EPI_ISL_747134, EPI_ISL_747135, EPI_ISL_747136, EPI_ISL_747137, EPI_ISL_747138, EPI_ISL_747139, EPI_ISL_747140, EPI_ISL_747141, EPI_ISL_747142, EPI_ISL_747143, EPI_ISL_747144, EPI_ISL_747145, EPI_ISL_747146, EPI_ISL_747147, EPI_ISL_747148, EPI_ISL_747149, EPI_ISL_747150, EPI_ISL_747151, EPI_ISL_747152, EPI_ISL_747153, EPI_ISL_747154, EPI_ISL_747155, EPI_ISL_747156, EPI_ISL_747157, EPI_ISL_747158, EPI_ISL_747159, EPI_ISL_747160, EPI_ISL_747161, EPI_ISL_747162, EPI_ISL_747163, EPI_ISL_747164, EPI_ISL_747165, EPI_ISL_747166, EPI_ISL_747167, EPI_ISL_747168, EPI_ISL_747169, EPI_ISL_747170, EPI_ISL_747171, EPI_ISL_747172, EPI_ISL_747173, EPI_ISL_747174, EPI_ISL_747175, EPI_ISL_747176, EPI_ISL_747177, EPI_ISL_747178, EPI_ISL_747179, EPI_ISL_747180, EPI_ISL_747181, EPI_ISL_747182, EPI_ISL_747183, EPI_ISL_747184, EPI_ISL_747185, EPI_ISL_747186, EPI_ISL_747187, EPI_ISL_747188, EPI_ISL_747189, EPI_ISL_747190, EPI_ISL_747191, EPI_ISL_747192, EPI_ISL_747193                                                                                                                                                                                                                                                 |                                                                                                                                        |                                                                                                                                        |                                                                                                                                                                                  |
| see above                                                                                                                                                                                                                                                                                                                                                                                                                                                                                                                                                                                                                                                                                                                                                                                                                                                                                                                                                                                                                                                                                                                                                                                                                                                                                                                                                                                                                                                                                                                                                                                                                                                                                                                                                                                                                                                                                                                                                                                                                                                                                                                                                                                                                                                                                                                                                                                                                                                                                                                                                                                                                                                                                                                                                                                                                                                                                                      | Respiratory Viruses Branch, Centers for Disease Control and Prevention                                                                 | Respiratory Viruses Branch, Centers for Disease Control and Prevention                                                                 | Queen,K., Li,Y., Tao,Y., Uehara,A., Montmayeur,A., Paden,C.R., Cook,P.W., Marine,R., Sheth,M., Wang,H., Lee,J., Tong,S.                                                          |
| EPI_ISL_747194                                                                                                                                                                                                                                                                                                                                                                                                                                                                                                                                                                                                                                                                                                                                                                                                                                                                                                                                                                                                                                                                                                                                                                                                                                                                                                                                                                                                                                                                                                                                                                                                                                                                                                                                                                                                                                                                                                                                                                                                                                                                                                                                                                                                                                                                                                                                                                                                                                                                                                                                                                                                                                                                                                                                                                                                                                                                                                 | Clinical Microbiology Laboratory, Faculty of Medicine, Universitas Indonesia                                                           | Clinical Microbiology Laboratory, Faculty of Medicine, Universitas Indonesia                                                           | Fera Ibrahim, Augustine Natasha, Andi Yasmon, Pratiwi Sudarmono, Yulia Rosa Saharman, Anis Karuniawati, Fithriyah                                                                |
| EPI_ISL_747195, EPI_ISL_747196, EPI_ISL_747197, EPI_ISL_747198, EPI_ISL_747199, EPI_ISL_747200, EPI_ISL_747201, EPI_ISL_747202, EPI_ISL_747203, EPI_ISL_747204, EPI_ISL_747205, EPI_ISL_747206, EPI_ISL_747207, EPI_ISL_747208, EPI_ISL_747209, EPI_ISL_747210, EPI_ISL_747211, EPI_ISL_747212, EPI_ISL_747213, EPI_ISL_747214, EPI_ISL_747215, EPI_ISL_747216, EPI_ISL_747217, EPI_ISL_747218, EPI_ISL_747219, EPI_ISL_747220, EPI_ISL_747221, EPI_ISL_747222, EPI_ISL_747223, EPI_ISL_747224, EPI_ISL_747225, EPI_ISL_747226, EPI_ISL_747227, EPI_ISL_747228, EPI_ISL_747229, EPI_ISL_747230, EPI_ISL_747231, EPI_ISL_747232                                                                                                                                                                                                                                                                                                                                                                                                                                                                                                                                                                                                                                                                                                                                                                                                                                                                                                                                                                                                                                                                                                                                                                                                                                                                                                                                                                                                                                                                                                                                                                                                                                                                                                                                                                                                                                                                                                                                                                                                                                                                                                                                                                                                                                                                                 |                                                                                                                                        |                                                                                                                                        |                                                                                                                                                                                  |
| see above                                                                                                                                                                                                                                                                                                                                                                                                                                                                                                                                                                                                                                                                                                                                                                                                                                                                                                                                                                                                                                                                                                                                                                                                                                                                                                                                                                                                                                                                                                                                                                                                                                                                                                                                                                                                                                                                                                                                                                                                                                                                                                                                                                                                                                                                                                                                                                                                                                                                                                                                                                                                                                                                                                                                                                                                                                                                                                      | UW Virology Lab                                                                                                                        | UW Virology Lab                                                                                                                        | Pavitra Roychoudhury, Hong Xie, Lasata Shrestha, Michelle Lin, Meei-Li Huang, Keith R Jerome, Alexander Greninger                                                                |
| EPI_ISL_747233, EPI_ISL_747234                                                                                                                                                                                                                                                                                                                                                                                                                                                                                                                                                                                                                                                                                                                                                                                                                                                                                                                                                                                                                                                                                                                                                                                                                                                                                                                                                                                                                                                                                                                                                                                                                                                                                                                                                                                                                                                                                                                                                                                                                                                                                                                                                                                                                                                                                                                                                                                                                                                                                                                                                                                                                                                                                                                                                                                                                                                                                 | National Institute of Health Research and Development                                                                                  | National Institute of Health Research and Development                                                                                  | Subangkit, Indrasari,ND; Wulandari,D; Monika,M; Pawestri,HA; Puspa,KD; Nugraha,AA; Ikawati,HD; Pangesti,KNA; Soekarso,T; Paisal; Setiawaty,Vivi                                  |
| EPI_ISL_747235                                                                                                                                                                                                                                                                                                                                                                                                                                                                                                                                                                                                                                                                                                                                                                                                                                                                                                                                                                                                                                                                                                                                                                                                                                                                                                                                                                                                                                                                                                                                                                                                                                                                                                                                                                                                                                                                                                                                                                                                                                                                                                                                                                                                                                                                                                                                                                                                                                                                                                                                                                                                                                                                                                                                                                                                                                                                                                 | Sukabumi Health Laboratory                                                                                                             | West Java Health Laboratory; School of Life Sciences and Technology, Institut Teknologi Bandung                                        | Azzania Fibriani, Ema Rahmawati, Ryan Bayusantika Ristandi, Rifky Waluyajati Rachman, Cut Nur Cinthia Alamanda, Isak Solihin, Rini Robiani, Miftahul Farid, Karimatu Khoirunnisa |
| EPI_ISL_747236                                                                                                                                                                                                                                                                                                                                                                                                                                                                                                                                                                                                                                                                                                                                                                                                                                                                                                                                                                                                                                                                                                                                                                                                                                                                                                                                                                                                                                                                                                                                                                                                                                                                                                                                                                                                                                                                                                                                                                                                                                                                                                                                                                                                                                                                                                                                                                                                                                                                                                                                                                                                                                                                                                                                                                                                                                                                                                 | Sukabumi Public Health                                                                                                                 | West Java Health Laboratory; School of Life Sciences and Technology, Institut Teknologi Bandung                                        | Azzania Fibriani, Ema Rahmawati, Ryan Bayusantika Ristandi, Rifky Waluyajati Rachman, Cut Nur Cinthia Alamanda, Isak Solihin, Rini Robiani, Miftahul Farid, Karimatu Khoirunnisa |
| EPI_ISL_747237                                                                                                                                                                                                                                                                                                                                                                                                                                                                                                                                                                                                                                                                                                                                                                                                                                                                                                                                                                                                                                                                                                                                                                                                                                                                                                                                                                                                                                                                                                                                                                                                                                                                                                                                                                                                                                                                                                                                                                                                                                                                                                                                                                                                                                                                                                                                                                                                                                                                                                                                                                                                                                                                                                                                                                                                                                                                                                 | National Institute of Health Research and Development                                                                                  | National Institute of Health Research and Development                                                                                  | Subangkit,Nafiandri,Estaria,V;Pawestri,HA;Puspa,KD;Nugraha,AA;Ikawati,HD;Pangesti,KNA;Soekarso,T;Paisal;Puspandari,N;Setiawaty,V                                                 |
| EPI_ISL_747238                                                                                                                                                                                                                                                                                                                                                                                                                                                                                                                                                                                                                                                                                                                                                                                                                                                                                                                                                                                                                                                                                                                                                                                                                                                                                                                                                                                                                                                                                                                                                                                                                                                                                                                                                                                                                                                                                                                                                                                                                                                                                                                                                                                                                                                                                                                                                                                                                                                                                                                                                                                                                                                                                                                                                                                                                                                                                                 | Bogor Public Health                                                                                                                    | West Java Health Laboratory; School of Life Sciences and Technology, Institut Teknologi Bandung                                        | Azzania Fibriani, Ema Rahmawati, Ryan Bayusantika Ristandi, Rifky Waluyajati Rachman, Cut Nur Cinthia Alamanda, Isak Solihin, Rini Robiani, Miftahul Farid, Karimatu Khoirunnisa |
| EPI_ISL_747239                                                                                                                                                                                                                                                                                                                                                                                                                                                                                                                                                                                                                                                                                                                                                                                                                                                                                                                                                                                                                                                                                                                                                                                                                                                                                                                                                                                                                                                                                                                                                                                                                                                                                                                                                                                                                                                                                                                                                                                                                                                                                                                                                                                                                                                                                                                                                                                                                                                                                                                                                                                                                                                                                                                                                                                                                                                                                                 | Kuningan Public Health Office                                                                                                          | West Java Health Laboratory; School of Life Sciences and Technology, Institut Teknologi Bandung                                        | Azzania Fibriani, Ema Rahmawati, Ryan Bayusantika Ristandi, Rifky Waluyajati Rachman, Cut Nur Cinthia Alamanda, Isak Solihin, Rini Robiani, Miftahul Farid, Karimatu Khoirunnisa |
| EPI_ISL_747240                                                                                                                                                                                                                                                                                                                                                                                                                                                                                                                                                                                                                                                                                                                                                                                                                                                                                                                                                                                                                                                                                                                                                                                                                                                                                                                                                                                                                                                                                                                                                                                                                                                                                                                                                                                                                                                                                                                                                                                                                                                                                                                                                                                                                                                                                                                                                                                                                                                                                                                                                                                                                                                                                                                                                                                                                                                                                                 | Al Islam Hospital                                                                                                                      | West Java Health Laboratory; School of Life Sciences and Technology, Institut Teknologi Bandung                                        | Azzania Fibriani, Ema Rahmawati, Ryan Bayusantika Ristandi, Rifky Waluyajati Rachman, Cut Nur Cinthia Alamanda, Isak Solihin, Rini Robiani, Miftahul Farid, Karimatu Khoirunnisa |
| EPI_ISL_747241                                                                                                                                                                                                                                                                                                                                                                                                                                                                                                                                                                                                                                                                                                                                                                                                                                                                                                                                                                                                                                                                                                                                                                                                                                                                                                                                                                                                                                                                                                                                                                                                                                                                                                                                                                                                                                                                                                                                                                                                                                                                                                                                                                                                                                                                                                                                                                                                                                                                                                                                                                                                                                                                                                                                                                                                                                                                                                 | Subang Public Health Office                                                                                                            | West Java Health Laboratory; School of Life Sciences and Technology, Institut Teknologi Bandung                                        | Azzania Fibriani, Ema Rahmawati, Ryan Bayusantika Ristandi, Rifky Waluyajati Rachman, Cut Nur Cinthia Alamanda, Isak Solihin, Rini Robiani, Miftahul Farid, Karimatu Khoirunnisa |
| EPI_ISL_747244                                                                                                                                                                                                                                                                                                                                                                                                                                                                                                                                                                                                                                                                                                                                                                                                                                                                                                                                                                                                                                                                                                                                                                                                                                                                                                                                                                                                                                                                                                                                                                                                                                                                                                                                                                                                                                                                                                                                                                                                                                                                                                                                                                                                                                                                                                                                                                                                                                                                                                                                                                                                                                                                                                                                                                                                                                                                                                 | BBMP Urban PHC                                                                                                                         | Department of Neuroirology, National Institute of Mental Health and Neurosciences (NIMHANS)                                            | Chitra Pattabiraman, Pramada Prasad, Anita S Desai, V Ravi                                                                                                                       |
| EPI_ISL_747245, EPI_ISL_747246, EPI_ISL_747247, EPI_ISL_747248, EPI_ISL_747249, EPI_ISL_747250, EPI_ISL_747251, EPI_ISL_747252, EPI_ISL_747253, EPI_ISL_747254, EPI_ISL_747255, EPI_ISL_747256, EPI_ISL_747257, EPI_ISL_747258, EPI_ISL_747260, EPI_ISL_747261, EPI_ISL_747262, EPI_ISL_747263, EPI_ISL_747264, EPI_ISL_747265, EPI_ISL_747266, EPI_ISL_747267, EPI_ISL_747268, EPI_ISL_747269, EPI_ISL_747270, EPI_ISL_747271, EPI_ISL_747272, EPI_ISL_747273, EPI_ISL_747274, EPI_ISL_747275, EPI_ISL_747276, EPI_ISL_747277, EPI_ISL_747278, EPI_ISL_747279, EPI_ISL_747280, EPI_ISL_747281                                                                                                                                                                                                                                                                                                                                                                                                                                                                                                                                                                                                                                                                                                                                                                                                                                                                                                                                                                                                                                                                                                                                                                                                                                                                                                                                                                                                                                                                                                                                                                                                                                                                                                                                                                                                                                                                                                                                                                                                                                                                                                                                                                                                                                                                                                                 |                                                                                                                                        |                                                                                                                                        |                                                                                                                                                                                  |
| see above                                                                                                                                                                                                                                                                                                                                                                                                                                                                                                                                                                                                                                                                                                                                                                                                                                                                                                                                                                                                                                                                                                                                                                                                                                                                                                                                                                                                                                                                                                                                                                                                                                                                                                                                                                                                                                                                                                                                                                                                                                                                                                                                                                                                                                                                                                                                                                                                                                                                                                                                                                                                                                                                                                                                                                                                                                                                                                      | Division of Emerging Infectious Diseases, Bureau of Infectious Diseases Diagnosis Control, Korea Disease Control and Prevention Agency | Division of Emerging Infectious Diseases, Bureau of Infectious Diseases Diagnosis Control, Korea Disease Control and Prevention Agency | Ae Kyung Park, Il-Hwan Kim, Heui Man Kim, Jeong-Min Kim, Namjoo Lee, Chaeyoung Lee, Sang Hee Woo, Eun-Jin Kim                                                                    |
| EPI_ISL_747283                                                                                                                                                                                                                                                                                                                                                                                                                                                                                                                                                                                                                                                                                                                                                                                                                                                                                                                                                                                                                                                                                                                                                                                                                                                                                                                                                                                                                                                                                                                                                                                                                                                                                                                                                                                                                                                                                                                                                                                                                                                                                                                                                                                                                                                                                                                                                                                                                                                                                                                                                                                                                                                                                                                                                                                                                                                                                                 | DNA SOLUTION LTD.                                                                                                                      | DNA SOLUTION LTD.                                                                                                                      | Md. Imran Khan, Kazi Nadim Hasan, Abu Sufian, Jannatun Naima, Abdul Khaleque, Mizanur Rahman, Firoz Kabir, Mohammad Fazle Alam Rabbi, Sharif Akhteruzzaman                       |
| EPI_ISL_747284, EPI_ISL_747285, EPI_ISL_747286, EPI_ISL_747287, EPI_ISL_747288, EPI_ISL_747289, EPI_ISL_747290, EPI_ISL_747291, EPI_ISL_747292, EPI_ISL_747293, EPI_ISL_747294, EPI_ISL_747295, EPI_ISL_747296, EPI_ISL_747297, EPI_ISL_747298, EPI_ISL_747299, EPI_ISL_747300, EPI_ISL_747301, EPI_ISL_747302, EPI_ISL_747303, EPI_ISL_747304, EPI_ISL_747305, EPI_ISL_747306, EPI_ISL_747307, EPI_ISL_747308, EPI_ISL_747309, EPI_ISL_747310, EPI_ISL_747311, EPI_ISL_747312, EPI_ISL_747313, EPI_ISL_747314, EPI_ISL_747315, EPI_ISL_747316, EPI_ISL_747317, EPI_ISL_747318, EPI_ISL_747319, EPI_ISL_747320, EPI_ISL_747321, EPI_ISL_747322, EPI_ISL_747323, EPI_ISL_747324, EPI_ISL_747325, EPI_ISL_747326, EPI_ISL_747327, EPI_ISL_747328, EPI_ISL_747329, EPI_ISL_747330, EPI_ISL_747331, EPI_ISL_747332, EPI_ISL_747333, EPI_ISL_747334, EPI_ISL_747335, EPI_ISL_747336, EPI_ISL_747337, EPI_ISL_747338, EPI_ISL_747339, EPI_ISL_747340, EPI_ISL_747341, EPI_ISL_747342, EPI_ISL_747343, EPI_ISL_747344, EPI_ISL_747345, EPI_ISL_747346, EPI_ISL_747347, EPI_ISL_747348, EPI_ISL_747349, EPI_ISL_747350, EPI_ISL_747351, EPI_ISL_747352, EPI_ISL_747353, EPI_ISL_747354, EPI_ISL_747355, EPI_ISL_747356, EPI_ISL_747357, EPI_ISL_747358, EPI_ISL_747359, EPI_ISL_747360, EPI_ISL_747361, EPI_ISL_747362, EPI_ISL_747363, EPI_ISL_747364, EPI_ISL_747365, EPI_ISL_747366, EPI_ISL_747367, EPI_ISL_747368, EPI_ISL_747369, EPI_ISL_747370, EPI_ISL_747371, EPI_ISL_747372, EPI_ISL_747373, EPI_ISL_747374, EPI_ISL_747375, EPI_ISL_747376, EPI_ISL_747377, EPI_ISL_747378, EPI_ISL_747379, EPI_ISL_747380, EPI_ISL_747381, EPI_ISL_747382, EPI_ISL_747383, EPI_ISL_747384, EPI_ISL_747385, EPI_ISL_747386, EPI_ISL_747387, EPI_ISL_747388, EPI_ISL_747389, EPI_ISL_747390, EPI_ISL_747391, EPI_ISL_747392, EPI_ISL_747393, EPI_ISL_747394, EPI_ISL_747395, EPI_ISL_747396, EPI_ISL_747397, EPI_ISL_747398, EPI_ISL_747399, EPI_ISL_747400, EPI_ISL_747401, EPI_ISL_747402, EPI_ISL_747403, EPI_ISL_747404, EPI_ISL_747405, EPI_ISL_747406, EPI_ISL_747407, EPI_ISL_747408, EPI_ISL_747409, EPI_ISL_747410, EPI_ISL_747411, EPI_ISL_747412, EPI_ISL_747413, EPI_ISL_747414, EPI_ISL_747415, EPI_ISL_747416, EPI_ISL_747417, EPI_ISL_747418, EPI_ISL_747419, EPI_ISL_747420, EPI_ISL_747421, EPI_ISL_747422, EPI_ISL_747423, EPI_ISL_747424, EPI_ISL_747425, EPI_ISL_747426, EPI_ISL_747427, EPI_ISL_747428, EPI_ISL_747429, EPI_ISL_747430, EPI_ISL_747431, EPI_ISL_747432, EPI_ISL_747433, EPI_ISL_747434, EPI_ISL_747435, EPI_ISL_747436, EPI_ISL_747437, EPI_ISL_747438, EPI_ISL_747439, EPI_ISL_747440, EPI_ISL_747441, EPI_ISL_747442, EPI_ISL_747443, EPI_ISL_747444, EPI_ISL_747445, EPI_ISL_747446, EPI_ISL_747447, EPI_ISL_747448, EPI_ISL_747449, EPI_ISL_747450, EPI_ISL_747451, EPI_ISL_747452, EPI_ISL_747453, EPI_ISL_747454, EPI_ISL_747455, EPI_ISL_747456, EPI_ISL_747457, EPI_ISL_747458 |                                                                                                                                        |                                                                                                                                        |                                                                                                                                                                                  |
| see above                                                                                                                                                                                                                                                                                                                                                                                                                                                                                                                                                                                                                                                                                                                                                                                                                                                                                                                                                                                                                                                                                                                                                                                                                                                                                                                                                                                                                                                                                                                                                                                                                                                                                                                                                                                                                                                                                                                                                                                                                                                                                                                                                                                                                                                                                                                                                                                                                                                                                                                                                                                                                                                                                                                                                                                                                                                                                                      | Division of Emerging Infectious Diseases, Bureau of Infectious Diseases Diagnosis Control, Korea Disease Control and Prevention Agency | Division of Emerging Infectious Diseases, Bureau of Infectious Diseases Diagnosis Control, Korea Disease Control and Prevention Agency | Ae Kyung Park, Il-Hwan Kim, Heui Man Kim, Jeong-Min Kim, Namjoo Lee, Chaeyoung Lee, Sang Hee Woo, Eun-Jin Kim                                                                    |
| EPI_ISL_747459, EPI_ISL_747460, EPI_ISL_747461, EPI_ISL_747462, EPI_ISL_747463, EPI_ISL_747464                                                                                                                                                                                                                                                                                                                                                                                                                                                                                                                                                                                                                                                                                                                                                                                                                                                                                                                                                                                                                                                                                                                                                                                                                                                                                                                                                                                                                                                                                                                                                                                                                                                                                                                                                                                                                                                                                                                                                                                                                                                                                                                                                                                                                                                                                                                                                                                                                                                                                                                                                                                                                                                                                                                                                                                                                 | Ospedale San Bonifacio                                                                                                                 | Istituto Zooprofilattico Sperimentale delle Venezie                                                                                    | Adelaide Milani, Alessia Schivo, Annalisa Salvato, Erika Giorgia Quaranta, Ambra Pastori, Bianca Zecchin, Alice Fusaro, Isabella Monne, Calogero Terregino, Antonia Ricci        |
| EPI_ISL_747465, EPI_ISL_747466, EPI_ISL_747467, EPI_ISL_747468,                                                                                                                                                                                                                                                                                                                                                                                                                                                                                                                                                                                                                                                                                                                                                                                                                                                                                                                                                                                                                                                                                                                                                                                                                                                                                                                                                                                                                                                                                                                                                                                                                                                                                                                                                                                                                                                                                                                                                                                                                                                                                                                                                                                                                                                                                                                                                                                                                                                                                                                                                                                                                                                                                                                                                                                                                                                | Ospedale Mater Salutis                                                                                                                 | Istituto Zooprofilattico Sperimentale delle Venezie                                                                                    | Adelaide Milani, Alessia Schivo, Annalisa Salvato, Erika Giorgia Quaranta, Ambra Pastori, Bianca Zecchin, Alice Fusaro, Isabella Monne, Calogero Terregino, Antonia Ricci        |
